# Supplementary material
Source: PubMed Central journal article supplement (PMC3229113)

## **Figure Legend**

### **Figure S1.**

Phylogenetic trees of bovine and human protein kinases. The phylogenetic trees were created by aligning the catalytic domain sequences of human and bovine protein kinases using the NJ method. Each empty node has a bootstrap value of 100. H, Human; B, Bovine.

AGC

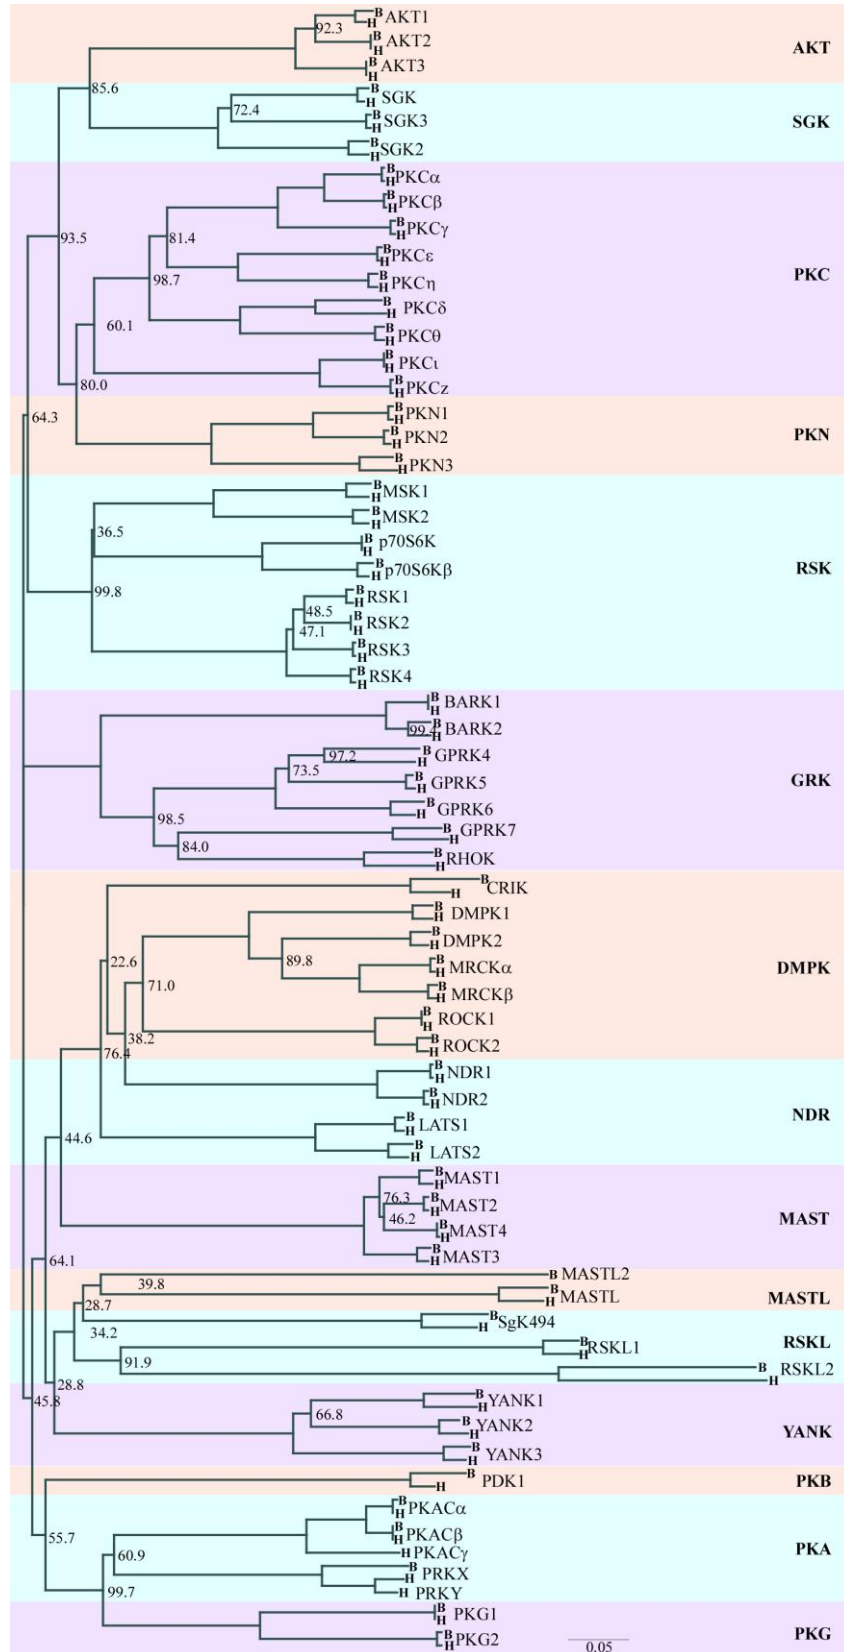

# CAMK

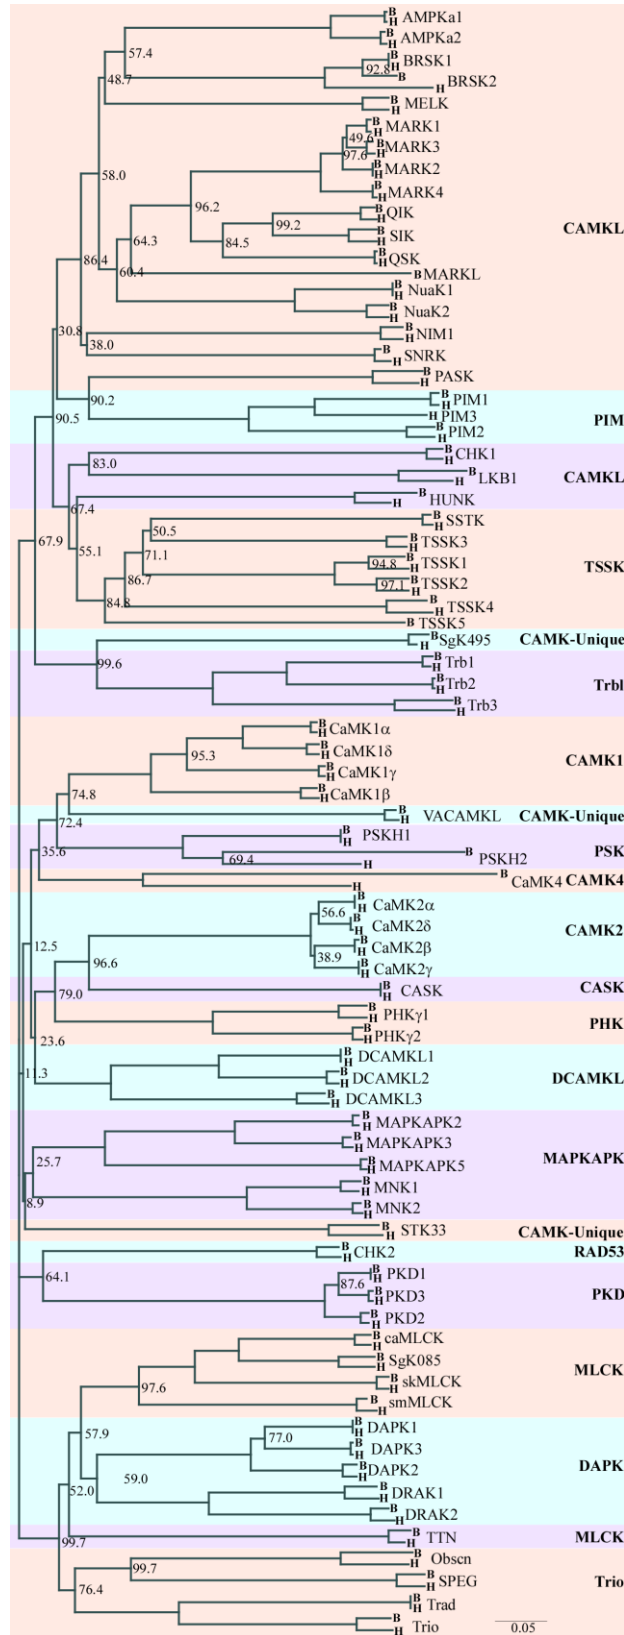

# CK1

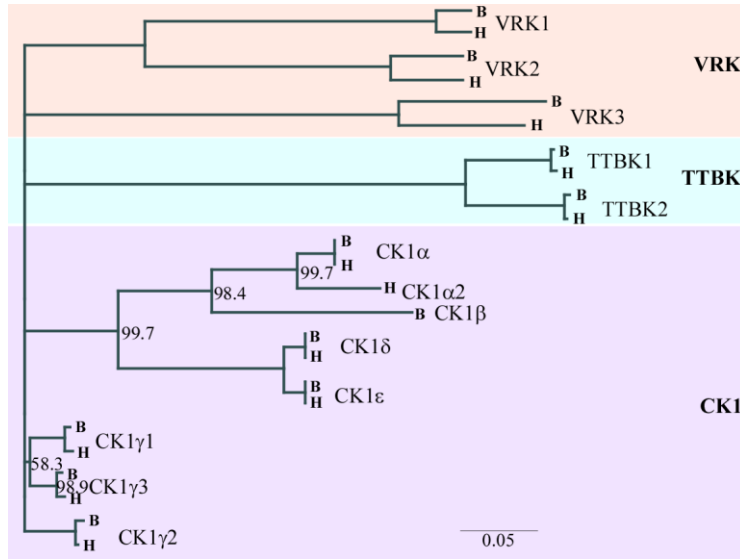

CMGC

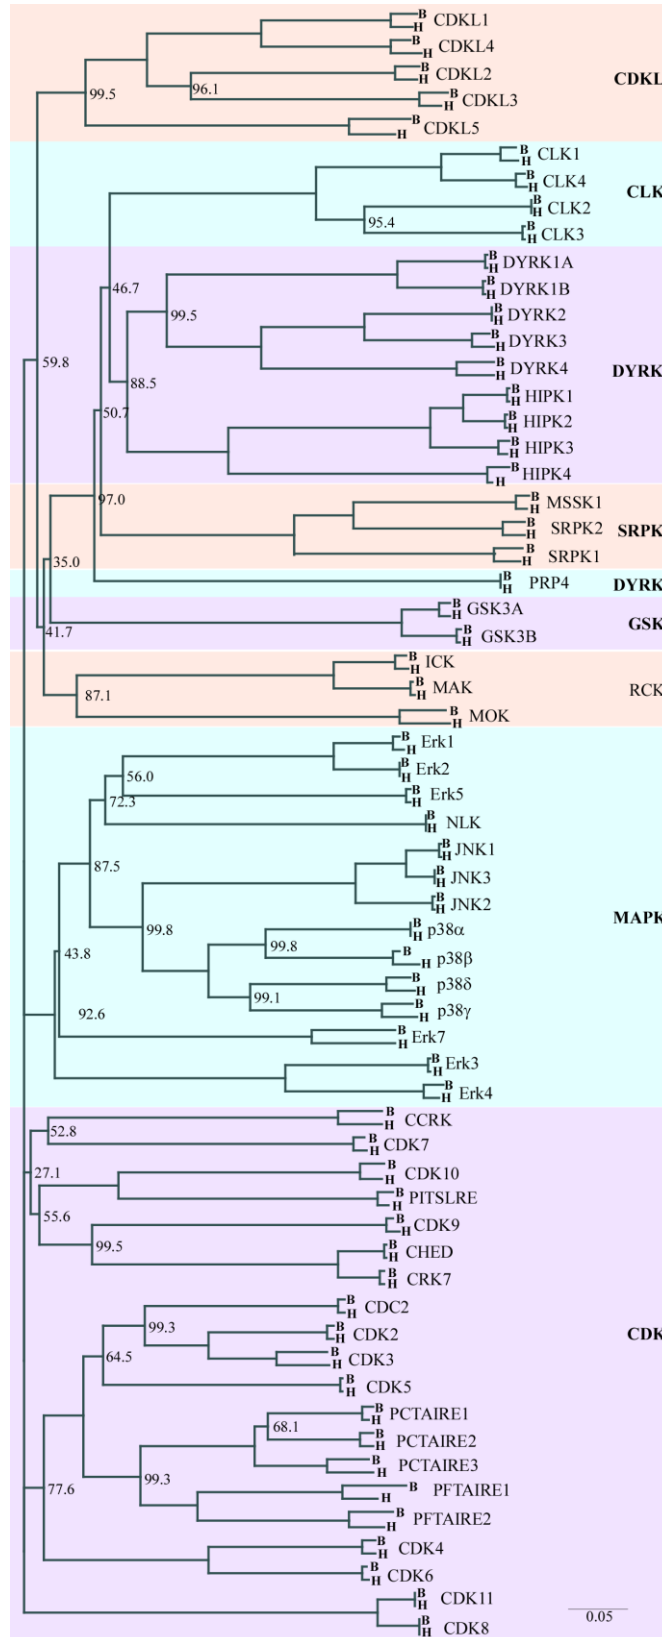

Other

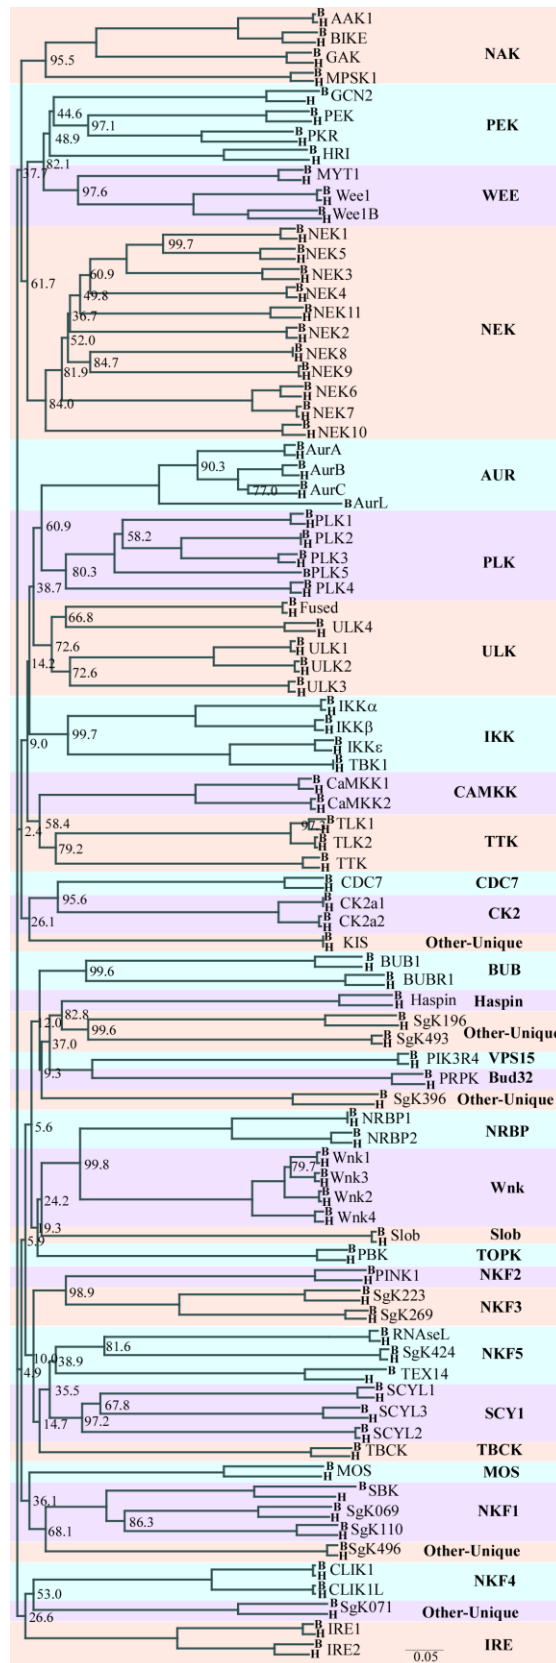

# RGC

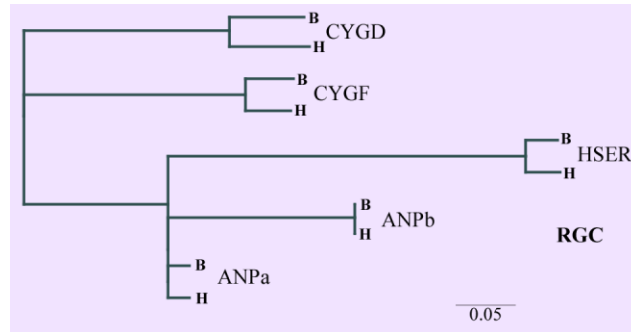

# STE

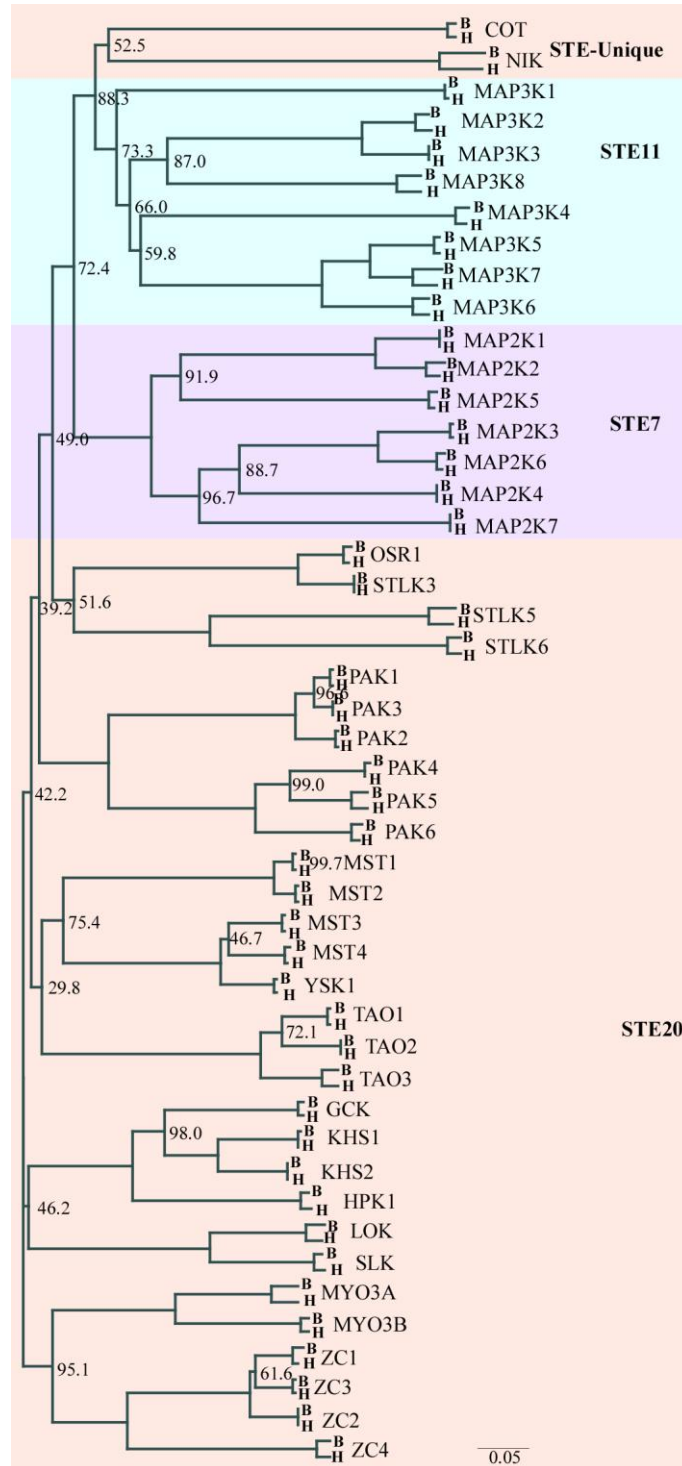



TK

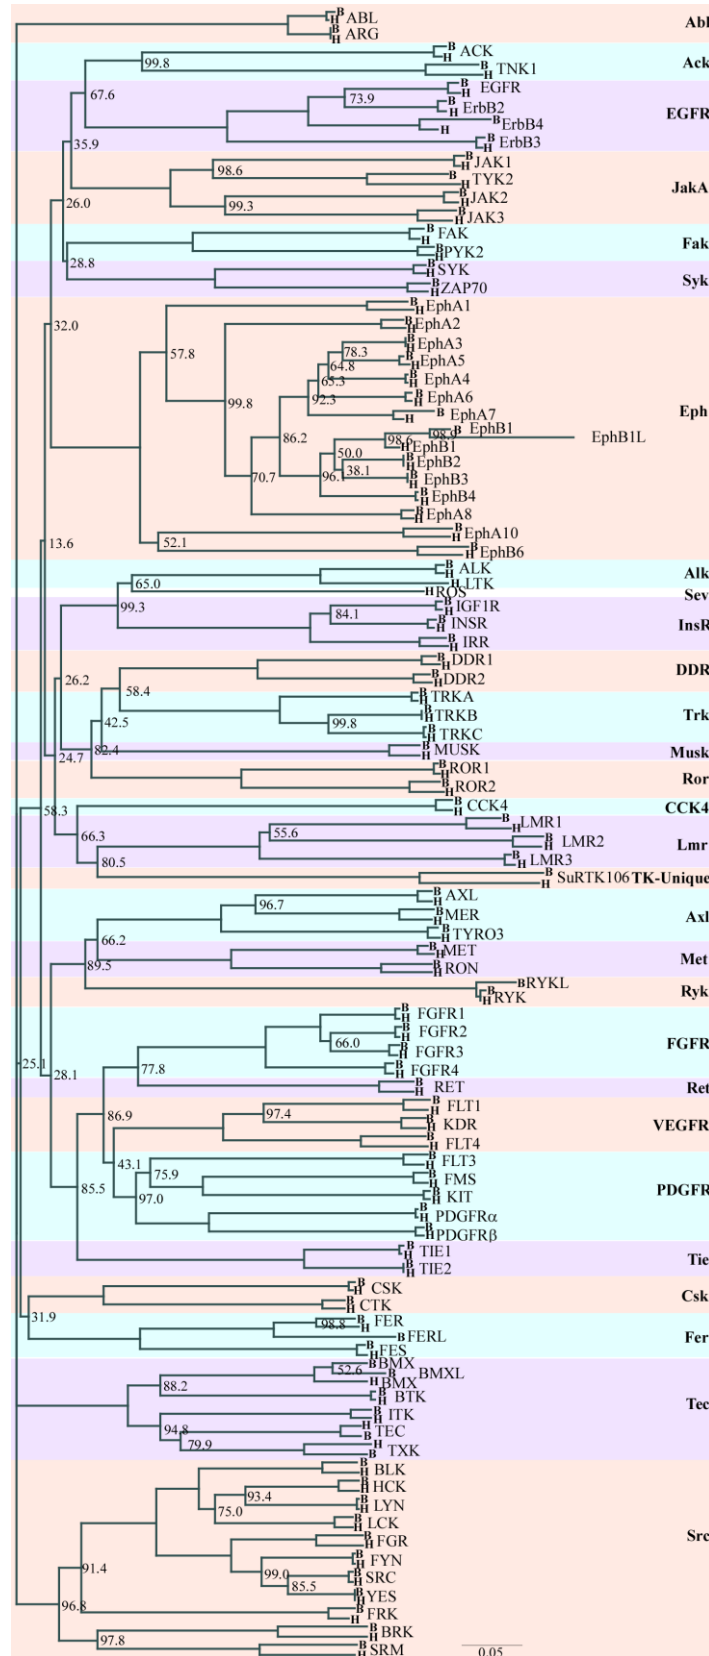

**TKL**

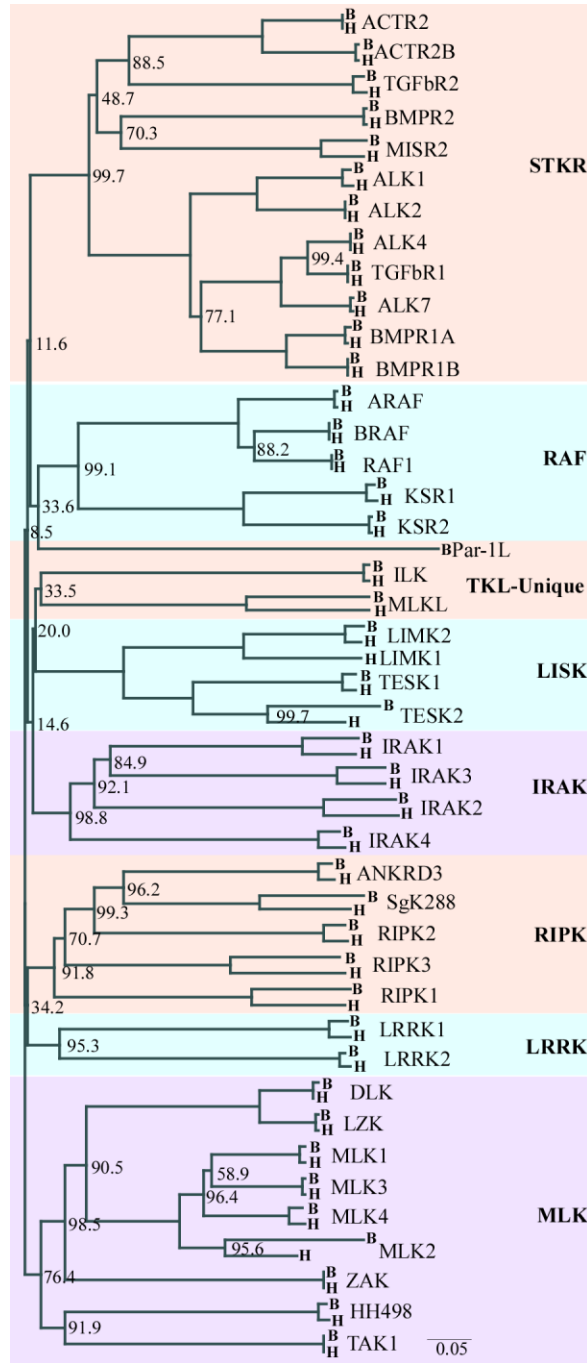

Supplement: gmb-34-1-587-gfigsuppl1.pdf [file gmb-34-1-587-gfigsuppl1.pdf]
