# Supplementary material
Source: PubMed Central journal article supplement (PMC3229113)
Supplement: gmb-34-1-587-suppl1.pdf [file gmb-34-1-587-suppl1.pdf]

| Line # | Name    | Symbol   | Group | Family | Subfamily | GeneID    |
|--------|---------|----------|-------|--------|-----------|-----------|
| 1      | AKT1    | AKT1     | AGC   | AKT    |           | 280991    |
| 2      | AKT2    | AKT2     | AGC   | AKT    |           | 534923    |
| 3      | AKT3    | AKT3     | AGC   | AKT    |           | 100137872 |
| 4      | DMPK1   |          | AGC   | DMPK   | GEK       |           |
| 5      | DMPK2   | CDC42BPG | AGC   | DMPK   | GEK       | 518121    |
| 6      | MRCKa   | CDC42BPA | AGC   | DMPK   | GEK       | 538392    |
| 7      | MRCKb   |          | AGC   | DMPK   | GEK       |           |
| 8      | ROCK1   | ROCK1    | AGC   | DMPK   | ROCK      | 785911    |
| 9      | ROCK2   | ROCK2    | AGC   | DMPK   | ROCK      | 282041    |
| 10     | CRIK    |          | AGC   | DMPK   |           |           |
| 11     | BARK1   | ADRBK1   | AGC   | GRK    | BARK      | 282682    |
| 12     | BARK2   | ADRBK2   | AGC   | GRK    | BARK      | 282136    |
| 13     | GPRK4   | GRK4     | AGC   | GRK    | GRK       | 512489    |
| 14     | GPRK5   | GRK5     | AGC   | GRK    | GRK       | 281801    |
| 15     | GPRK6   |          | AGC   | GRK    | GRK       |           |
| 16     | GPRK7   | GRK7     | AGC   | GRK    | GRK       | 281802    |
| 17     | RHOK    | GRK1     | AGC   | GRK    | GRK       | 281457    |
| 18     | MAST1   | MAST1    | AGC   | MAST   |           | 539825    |
| 19     | MAST2   |          | AGC   | MAST   |           |           |
| 20     | MAST3   | MAST3    | AGC   | MAST   |           | 534230    |
| 21     | MAST4   |          | AGC   | MAST   |           |           |
| 22     | MASTL   | MASTL    | AGC   | MASTL  |           | 540206    |
| 23     | MASTL2  |          | AGC   | MASTL  |           |           |
| 24     | LATS1   | LATS1    | AGC   | NDR    |           | 535935    |
| 25     | LATS2   | LATS2    | AGC   | NDR    |           | 508208    |
| 26     | NDR1    | STK38    | AGC   | NDR    |           | 533677    |
| 27     | NDR2    | STK38L   | AGC   | NDR    |           | 514787    |
| 28     | PKACa   | PRKACA   | AGC   | PKA    |           | 282322    |
| 29     | PKACb   | PRKACB   | AGC   | PKA    |           | 282323    |
| 30     | PRKX    | PRKX     | AGC   | PKA    |           | 505773    |
| 31     | PDK1    | PDK1     | AGC   | PKB    |           | 100138102 |
| 32     | PKCi    | PRKCI    | AGC   | PKC    | Atypical  | 528478    |
| 33     | PKCz    | PRKCZ    | AGC   | PKC    | Atypical  | 286877    |
| 34     | PKCa    | PRKCA    | AGC   | PKC    | Classical | 282001    |
| 35     | PKCb    | PRKCB1   | AGC   | PKC    | Classical | 282325    |
| 36     | PKCg    | PRKCG    | AGC   | PKC    | Classical | 282002    |
| 37     | PKCd    | PRKCD    | AGC   | PKC    | Nobel     | 505708    |
| 38     | PKCe    | PRKCE    | AGC   | PKC    | Nobel     | 507041    |
| 39     | PKCh    | PRKCH    | AGC   | PKC    | Nobel     | 518542    |
| 40     | PKCt    | PRKCQ    | AGC   | PKC    | Nobel     | 505901    |
| 41     | PKG1    | PRKG1    | AGC   | PKG    |           | 282004    |
| 42     | PKG2    | PRKG2    | AGC   | PKG    |           | 533330    |
| 43     | PKN1    | PKN1     | AGC   | PKN    |           | 509080    |
| 44     | PKN2    | PKN2     | AGC   | PKN    |           | 519754    |
| 45     | PKN3    | PKN3     | AGC   | PKN    |           | 505353    |
| 46     | MSK1    | RPS6KA5  | AGC   | RSK    | MSK       | 504408    |
| 47     | MSK2    |          | AGC   | RSK    | MSK       | 523746    |
| 48     | p70S6K  | RPS6KB1  | AGC   | RSK    | p70       | 404181    |
| 49     | p70S6Kb | RPS6KB2  | AGC   | RSK    | p70       | 506083    |

|    |         |         |          |       |        |           |
|----|---------|---------|----------|-------|--------|-----------|
| 50 | RSK1    | RPS6KA2 | AGC      | RSK   | RSK    | 517953    |
| 51 | RSK2    | RPS6KA3 | AGC      | RSK   | RSK    | 511190    |
| 52 | RSK3    | RPS6KA1 | AGC      | RSK   | RSK    | 533908    |
| 53 | RSK4    | RPS6KA6 | AGC      | RSK   | RSK    | 526227    |
| 54 | RSKL1   | RPS6KC1 | AGC      | RSKL  |        | 533192    |
| 55 | RSKL2   | RPS6KL1 | AGC      | RSKL  |        | 530047    |
| 56 | SgK494  | SGK494  | AGC      | RSKL  |        | 527796    |
| 57 | SGK     | SGK1    | AGC      | SGK   |        | 515854    |
| 58 | SGK2    | SGK2    | AGC      | SGK   |        | 517909    |
| 59 | SGK3    | SGK3    | AGC      | SGK   |        | 504480    |
| 60 | YANK1   | STK32A  | AGC      | YANK  |        | 100125774 |
| 61 | YANK2   | STK32B  | AGC      | YANK  |        | 529134    |
| 62 | YANK3   | STK32C  | AGC      | YANK  |        | 524218    |
| 63 | A6      | TWF1    | Atypical | A6    |        | 506683    |
| 64 | A6r     | TWF2    | Atypical | A6    |        | 282024    |
| 65 | ADCK3   | CABC1   | Atypical | ABC1  | ABC1-A | 536925    |
| 66 | ADCK4   | ADCK4   | Atypical | ABC1  | ABC1-A | 514322    |
| 67 | ADCK1   | ADCK1   | Atypical | ABC1  | ABC1-B | 533372    |
| 68 | ADCK5   | ADCK5   | Atypical | ABC1  | ABC1-B | 522614    |
| 69 | ADCK2   | ADCK2   | Atypical | ABC1  | ABC1-C | 539345    |
| 70 | ChaK1   | TRPM7   | Atypical | Alpha | ChaK   | 514642    |
| 71 | ChaK2   | TRPM6   | Atypical | Alpha | ChaK   | 527597    |
| 72 | eEF2K   | EEF2K   | Atypical | Alpha | eEF2K  | 521730    |
| 73 | AlphaK1 | ALPK3   | Atypical | Alpha |        |           |
| 74 | AlphaK2 | ALPK2   | Atypical | Alpha |        | 510218    |
| 75 | AlphaK3 | ALPK1   | Atypical | Alpha |        | 524375    |
| 76 | BCR     | BCR     | Atypical | BCR   |        | 789892    |
| 77 | BRD2    | BRD2    | Atypical | BRD   |        | 505358    |
| 78 | BRD3    | BRD3    | Atypical | BRD   |        | 525051    |
| 79 | BRD4    | BRD4    | Atypical | BRD   |        | 614048    |
| 80 | BRDT    | BRDT    | Atypical | BRD   |        | 523971    |
| 81 | FASTK   | FASTK   | Atypical | FAST  |        | 509781    |
| 82 | G11     | STK19   | Atypical | G11   |        | 508320    |
| 83 | H11     | HSPB8   | Atypical | H11   |        | 539524    |
| 84 | BCKDK   | BCKDK   | Atypical | PDHK  |        | 505005    |
| 85 | PDHK1   | PDK1    | Atypical | PDHK  |        | 528655    |
| 86 | PDHK2   | PDK2    | Atypical | PDHK  |        | 524075    |
| 87 | PDHK3   | PDK3    | Atypical | PDHK  |        | 510841    |
| 88 | PDHK4   | PDK4    | Atypical | PDHK  |        | 507367    |
| 89 | ATM     | ATM     | Atypical | PIKK  | ATM    | 526824    |
| 90 | ATR     | ATR     | Atypical | PIKK  | ATR    | 504869    |
| 91 | DNAPK   | PRKDC   | Atypical | PIKK  | DNAPK  | 512740    |
| 92 | FRAP    | MTOR    | Atypical | PIKK  | FRAP   | 100139219 |
| 93 | SMG1    | SMG1    | Atypical | PIKK  | SMG1   | 525143    |
| 94 | TRRAP   | TRRAP   | Atypical | PIKK  | TRRAP  | 507169    |
| 95 | RIOK1   | RIOK1   | Atypical | RIO   | RIO1   | 516289    |
| 96 | RIOK2   | RIOK2   | Atypical | RIO   | RIO2   | 540772    |
| 97 | RIOK3   | RIOK3   | Atypical | RIO   | RIO3   | 522917    |
| 98 | TAF1    | TAF1    | Atypical | TAF1  |        | 504792    |
| 99 | TIF1a   | TRIM33  | Atypical | TIF1  |        | 533296    |

|     |          |            |          |             |         |           |
|-----|----------|------------|----------|-------------|---------|-----------|
| 100 | TIF1b    |            | Atypical | TIF1        |         |           |
| 101 | TIF1g    | TRIM24     | Atypical | TIF1        |         | 537246    |
| 102 | CaMK1a   | CAMK1      | CAMK     | CAMK1       |         | 520498    |
| 103 | CaMK1b   | PNCK       | CAMK     | CAMK1       |         | 614251    |
| 104 | CaMK1d   | CAMK1D     | CAMK     | CAMK1       |         | 526873    |
| 105 | CaMK1g   | CAMK1G     | CAMK     | CAMK1       |         | 511504    |
| 106 | CaMK2a   | CAMK2A     | CAMK     | CAMK2       |         | 530719    |
| 107 | CaMK2b   | CAMK2B     | CAMK     | CAMK2       |         | 525416    |
| 108 | CaMK2d   | CAMK2D     | CAMK     | CAMK2       |         | 532713    |
| 109 | CaMK2g   | CAMK2G     | CAMK     | CAMK2       |         | 282162    |
| 110 | CaMK4    | OC10033708 | CAMK     | CAMK4       |         | 100337083 |
| 111 | AMPKa1   | PRKAA1     | CAMK     | CAMKL       | AMPK    | 540404    |
| 112 | AMPKa2   | PRKAA2     | CAMK     | CAMKL       | AMPK    | 538954    |
| 113 | BRSK1    | BRSK1      | CAMK     | CAMKL       | BRSK    | 538009    |
| 114 | BRSK2    | BRSK2      | CAMK     | CAMKL       | BRSK    | 535868    |
| 115 | CHK1     | CHEK1      | CAMK     | CAMKL       | CHK1    | 513678    |
| 116 | HUNK     | HUNK       | CAMK     | CAMKL       | HUNK    | 537640    |
| 117 | LKB1     | STK11      | CAMK     | CAMKL       | LKB     | 515245    |
| 118 | MARK1    | MARK1      | CAMK     | CAMKL       | MARK    | 539563    |
| 119 | MARK2    | MARK2      | CAMK     | CAMKL       | MARK    | 535197    |
| 120 | MARK3    | MARK3      | CAMK     | CAMKL       | MARK    | 534872    |
| 121 | MARK4    | MARK4      | CAMK     | CAMKL       | MARK    | 525675    |
| 122 | MARKL    | LOC618482  | CAMK     | CAMKL       | MARK    | 618482    |
| 123 | MELK     | MELK       | CAMK     | CAMKL       | MELK    | 520088    |
| 124 | NIM1     | LOC530210  | CAMK     | CAMKL       | NIM1    | 530210    |
| 125 | NuaK1    | NUAK1      | CAMK     | CAMKL       | NuaK    | 519892    |
| 126 | NuaK2    | NUAK2      | CAMK     | CAMKL       | NuaK    | 518632    |
| 127 | PASK     | PASK       | CAMK     | CAMKL       | PASK    | 512154    |
| 128 | QIK      | SNF1LK2    | CAMK     | CAMKL       | QIK     | 539570    |
| 129 | QSK      | SIK3       | CAMK     | CAMKL       | QIK     | 506539    |
| 130 | SIK      | SIK        | CAMK     | CAMKL       | QIK     |           |
| 131 | SNRK     | SNRK       | CAMK     | CAMKL       | SNRK    | 536909    |
| 132 | SgK495   | STK40      | CAMK     | CAMK-Unique |         | 515723    |
| 133 | STK33    | STK33      | CAMK     | CAMK-Unique |         | 528309    |
| 134 | VACAMKL  | CAMKV      | CAMK     | CAMK-Unique |         | 525741    |
| 135 | CASK     | CASK       | CAMK     | CASK        |         | 404149    |
| 136 | DAPK1    | DAPK1      | CAMK     | DAPK        |         | 540873    |
| 137 | DAPK2    | DAPK2      | CAMK     | DAPK        |         | 529131    |
| 138 | DAPK3    | DAPK3      | CAMK     | DAPK        |         | 525506    |
| 139 | DRAK1    | STK17A     | CAMK     | DAPK        |         | 513665    |
| 140 | DRAK2    | STK17B     | CAMK     | DAPK        |         | 511373    |
| 141 | DCAMKL1  |            | CAMK     | DCAMKL      |         |           |
| 142 | DCAMKL2  | DCLK2      | CAMK     | DCAMKL      |         | 536110    |
| 143 | DCAMKL3  | DCLK3      | CAMK     | DCAMKL      |         | 507205    |
| 144 | MAPKAPK2 | MAPKAPK2   | CAMK     | MAPKAPK     | MAPKAPK | 788091    |
| 145 | MAPKAPK3 | MAPKAPK3   | CAMK     | MAPKAPK     | MAPKAPK | 615215    |
| 146 | MAPKAPK5 | MAPKAPK5   | CAMK     | MAPKAPK     | MAPKAPK | 535625    |
| 147 | MNK1     | MKNK1      | CAMK     | MAPKAPK     | MNK     | 525647    |
| 148 | MNK2     | MKNK2      | CAMK     | MAPKAPK     | MNK     | 538519    |
| 149 | caMLCK   | MYLK3      | CAMK     | MLCK        |         | 526379    |

|     |        |            |      |       |       |           |
|-----|--------|------------|------|-------|-------|-----------|
| 150 | SgK085 | MYLK4      | CAMK | MLCK  |       | 518025    |
| 151 | skMLCK | MYLK2      | CAMK | MLCK  |       | 533378    |
| 152 | smMLCK | MYLK       | CAMK | MLCK  |       | 338037    |
| 153 | TTN    | TTN        | CAMK | MLCK  |       | 540561    |
| 154 | PHKg1  | PHKG1      | CAMK | PHK   |       | 540682    |
| 155 | PHKg2  | PHKG2      | CAMK | PHK   |       | 512670    |
| 156 | PIM1   | PIM1       | CAMK | PIM   |       | 281402    |
| 157 | PIM2   | PIM2       | CAMK | PIM   |       | 508424    |
| 158 | PIM3   | OC10033665 | CAMK | PIM   |       | 100336651 |
| 159 | PKD1   | PRKD1      | CAMK | PKD   |       | 533270    |
| 160 | PKD2   | PRKD2      | CAMK | PKD   |       | 782793    |
| 161 | PKD3   | PRKD3      | CAMK | PKD   |       | 538447    |
| 162 | PSKH1  | PSKH1      | CAMK | PSK   |       | 509656    |
| 163 | CHK2   | CHEK2      | CAMK | RAD53 |       | 518897    |
| 164 | Trb1   | TRIB1      | CAMK | Trbl  |       | 521857    |
| 165 | Trb2   | TRIB2      | CAMK | Trbl  |       | 352960    |
| 166 | Trb3   | TRIB3      | CAMK | Trbl  |       | 538465    |
| 167 | Obscn  | OBSCN      | CAMK | Trio  |       | 508247    |
| 168 | SPEG   | SPEG       | CAMK | Trio  |       | 523490    |
| 169 | Trad   | KALRN      | CAMK | Trio  |       | 540675    |
| 170 | Trio   | TRIO       | CAMK | Trio  |       | 538292    |
| 171 | SSTK   | TSSK6      | CAMK | TSSK  |       | 539707    |
| 172 | TSSK1  | TSSK1B     | CAMK | TSSK  |       | 529193    |
| 173 | TSSK2  | TSSK2      | CAMK | TSSK  |       |           |
| 174 | TSSK3  | TSSK3      | CAMK | TSSK  |       | 538659    |
| 175 | TSSK4  | TSSK4      | CAMK | TSSK  |       | 539477    |
| 176 | TSSK5  | LOC523023  | CAMK | TSSK  |       | 523023    |
| 177 | CK1a   | CSNK1A1    | CK1  | CK1   |       | 282684    |
| 178 | CK1b   | CSNK1B     | CK1  | CK1   |       | 785423    |
| 179 | CK1d   | CSNK1D     | CK1  | CK1   |       | 523542    |
| 180 | CK1e   | CSNK1E     | CK1  | CK1   |       | 768234    |
| 181 | CK1g1  | CSNK1G1    | CK1  | CK1   |       | 527889    |
| 182 | CK1g2  | CSNK1G2    | CK1  | CK1   |       | 506060    |
| 183 | CK1g3  |            | CK1  | CK1   |       |           |
| 184 | TTBK1  |            | CK1  | TTBK  |       |           |
| 185 | TTBK2  | TTBK2      | CK1  | TTBK  |       | 541215    |
| 186 | VRK1   | VRK1       | CK1  | VRK   |       | 618880    |
| 187 | VRK2   | VRK2       | CK1  | VRK   |       | 523902    |
| 188 | VRK3   | VRK3       | CK1  | VRK   |       | 520302    |
| 189 | CDC2   | CDC2       | CMGC | CDK   | CDC2  | 281061    |
| 190 | CDK2   | CDK2       | CMGC | CDK   | CDC2  | 519217    |
| 191 | CDK3   | CDK3       | CMGC | CDK   | CDC2  | 618631    |
| 192 | CDK10  | CDK10      | CMGC | CDK   | CDK10 | 615171    |
| 193 | CDK4   | CDK4       | CMGC | CDK   | CDK4  | 510618    |
| 194 | CDK6   | CDK6       | CMGC | CDK   | CDK4  | 511754    |
| 195 | CDK5   | CDK5       | CMGC | CDK   | CDK5  | 281066    |
| 196 | CDK7   | CDK7       | CMGC | CDK   | CDK7  | 515462    |
| 197 | CDK11  | CDC2L6     | CMGC | CDK   | CDK8  | 511802    |
| 198 | CDK8   | CDK8       | CMGC | CDK   | CDK8  | 507149    |
| 199 | CDK9   | CDK9       | CMGC | CDK   | CDK9  | 520580    |

|     |          |           |      |      |         |        |
|-----|----------|-----------|------|------|---------|--------|
| 200 | CHED     | CDC2L5    | CMGC | CDK  | CRK7    | 511147 |
| 201 | CRK7     | CRKRS     | CMGC | CDK  | CRK7    | 511513 |
| 202 | PITSLRE  | CDC2L1    | CMGC | CDK  | PITSLRE | 493708 |
| 203 | PCTAIRE1 | PCTK1     | CMGC | CDK  | TAIRE   | 613810 |
| 204 | PCTAIRE2 | PCTK2     | CMGC | CDK  | TAIRE   | 539655 |
| 205 | PCTAIRE3 | PCTK3     | CMGC | CDK  | TAIRE   | 534048 |
| 206 | PFTAIRE1 | CDK14     | CMGC | CDK  | TAIRE   | 784403 |
| 207 | PFTAIRE2 | CDK15     | CMGC | CDK  | TAIRE   | 616118 |
| 208 | CCRK     | CCRK      | CMGC | CDK  |         | 510920 |
| 209 | CDKL1    | CDKL1     | CMGC | CDKL |         | 523900 |
| 210 | CDKL2    | CDKL2     | CMGC | CDKL |         | 533114 |
| 211 | CDKL3    | CDKL3     | CMGC | CDKL |         | 541279 |
| 212 | CDKL4    | CDKL4     | CMGC | CDKL |         | 517478 |
| 213 | CDKL5    | CDKL5     | CMGC | CDKL |         | 538337 |
| 214 | CLK1     | CLK1      | CMGC | CLK  |         | 613808 |
| 215 | CLK2     | CLK2      | CMGC | CLK  |         | 512737 |
| 216 | CLK3     | CLK3      | CMGC | CLK  |         | 505499 |
| 217 | CLK4     | CLK4      | CMGC | CLK  |         | 529633 |
| 218 | DYRK1A   | DYRK1A    | CMGC | DYRK | Dyrk1   | 532989 |
| 219 | DYRK1B   | DYRK1B    | CMGC | DYRK | Dyrk1   | 507571 |
| 220 | DYRK2    | DYRK2     | CMGC | DYRK | Dyrk2   | 514916 |
| 221 | DYRK3    | DYRK3     | CMGC | DYRK | Dyrk2   | 505149 |
| 222 | DYRK4    | LOC531276 | CMGC | DYRK | Dyrk2   | 531276 |
| 223 | HIPK1    | HIPK1     | CMGC | DYRK | HIPK    | 512233 |
| 224 | HIPK2    | HIPK2     | CMGC | DYRK | HIPK    | 510158 |
| 225 | HIPK3    | HIPK3     | CMGC | DYRK | HIPK    | 538866 |
| 226 | HIPK4    | HIPK4     | CMGC | DYRK | HIPK    | 520157 |
| 227 | PRP4     | PRPF4B    | CMGC | DYRK | PRP4    | 512236 |
| 228 | GSK3A    | GSK3A     | CMGC | GSK  |         | 536561 |
| 229 | GSK3B    | GSK3B     | CMGC | GSK  |         | 790875 |
| 230 | Erk1     | MAPK3     | CMGC | MAPK | ERK     | 531391 |
| 231 | Erk2     | MAPK1     | CMGC | MAPK | ERK     | 327672 |
| 232 | Erk3     | MAPK6     | CMGC | MAPK | ERK     | 538094 |
| 233 | Erk4     | MAPK4     | CMGC | MAPK | ERK     | 529183 |
| 234 | Erk5     | MAPK7     | CMGC | MAPK | ERK     | 537703 |
| 235 | Erk7     | MAPK15    | CMGC | MAPK | Erk7    | 512125 |
| 236 | JNK1     | MAPK8     | CMGC | MAPK | JNK     | 539941 |
| 237 | JNK2     | MAPK9     | CMGC | MAPK | JNK     | 534125 |
| 238 | JNK3     | MAPK10    | CMGC | MAPK | JNK     | 537631 |
| 239 | NLK      | NLK       | CMGC | MAPK | nmo     | 507204 |
| 240 | p38a     | MAPK14    | CMGC | MAPK | p38     | 534492 |
| 241 | p38b     | MAPK11    | CMGC | MAPK | p38     | 618906 |
| 242 | p38d     | MAPK13    | CMGC | MAPK | p38     | 535327 |
| 243 | p38g     | MAPK12    | CMGC | MAPK | p38     | 512943 |
| 244 | ICK      | ICK       | CMGC | RCK  |         | 506286 |
| 245 | MAK      | MAK       | CMGC | RCK  |         | 536048 |
| 246 | MOK      | RAGE      | CMGC | RCK  |         | 616277 |
| 247 | MSSK1    | SRPK3     | CMGC | SRPK |         | 508325 |
| 248 | SRPK1    | SRPK1     | CMGC | SRPK |         | 512631 |
| 249 | SRPK2    | SRPK2     | CMGC | SRPK |         | 505945 |

|     |        |           |       |              |      |           |
|-----|--------|-----------|-------|--------------|------|-----------|
| 250 | AurA   | AURKA     | Other | AUR          |      | 504437    |
| 251 | AurB   | AURKB     | Other | AUR          |      | 360192    |
| 252 | AurC   | AURKC     | Other | AUR          |      | 618599    |
| 253 | AurL   |           | Other | AUR          |      |           |
| 254 | BUB1   | BUB1      | Other | BUB          |      | 514777    |
| 255 | BUBR1  | BUB1B     | Other | BUB          |      | 537027    |
| 256 | PRPK   | TP53RK    | Other | Bud32        |      | 619100    |
| 257 | CaMKK1 | CAMKK1    | Other | CAMKK        | Meta | 510260    |
| 258 | CaMKK2 | CAMKK2    | Other | CAMKK        | Meta | 509084    |
| 259 | CDC7   | CDC7      | Other | CDC7         |      | 516094    |
| 260 | CK2a1  | CSNK2A1   | Other | CK2          |      | 282419    |
| 261 | CK2a2  | CSNK2A2   | Other | CK2          |      | 282420    |
| 262 | Haspin | GSG2      | Other | Haspin       |      | 767819    |
| 263 | IKKa   | CHUK      | Other | IKK          |      | 281073    |
| 264 | IKKb   | IKBKB     | Other | IKK          |      | 281854    |
| 265 | IKKe   | IKBKE     | Other | IKK          |      | 533216    |
| 266 | TBK1   | TBK1      | Other | IKK          |      | 533141    |
| 267 | IRE1   | IRE1      | Other | IRE          |      |           |
| 268 | IRE2   | IRE2      | Other | IRE          |      |           |
| 269 | MOS    | MOS       | Other | MOS          |      | 444869    |
| 270 | AAK1   | AAK1      | Other | NAK          |      | 532546    |
| 271 | BIKE   | BIKE      | Other | NAK          |      | 505766    |
| 272 | GAK    | GAK       | Other | NAK          |      | 511296    |
| 273 | MPSK1  | STK16     | Other | NAK          |      | 521237    |
| 274 | NEK1   |           | Other | NEK          |      |           |
| 275 | NEK10  | NEK10     | Other | NEK          |      | 522335    |
| 276 | NEK11  | NEK11     | Other | NEK          |      | 614924    |
| 277 | NEK2   | NEK2      | Other | NEK          |      | 523998    |
| 278 | NEK3   | NEK3      | Other | NEK          |      | 505876    |
| 279 | NEK4   | NEK4      | Other | NEK          |      | 511455    |
| 280 | NEK5   | NEK5      | Other | NEK          |      | 100138147 |
| 281 | NEK6   | NEK6      | Other | NEK          |      | 515816    |
| 282 | NEK7   | NEK7      | Other | NEK          |      | 781355    |
| 283 | NEK8   | NEK8      | Other | NEK          |      | 532332    |
| 284 | NEK9   | NEK9      | Other | NEK          |      | 534652    |
| 285 | SBK    | LOC614815 | Other | NKF1         |      | 614815    |
| 286 | SgK069 | SBK2      | Other | NKF1         |      | 615123    |
| 287 | SgK110 | LOC789661 | Other | NKF1         |      | 789661    |
| 288 | PINK1  | PINK1     | Other | NKF2         |      | 510683    |
| 289 | SgK223 | SgK223    | Other | NKF3         |      |           |
| 290 | SgK269 | SgK269    | Other | NKF3         |      |           |
| 291 | CLIK1  | STK35     | Other | NKF4         |      | 540979    |
| 292 | CLIK1L | PDIK1L    | Other | NKF4         |      | 510253    |
| 293 | SgK424 | LOC785881 | Other | NKF5         |      | 785881    |
| 294 | TEX14  | TEX14     | Other | NKF5         |      | 522810    |
| 295 | NRBP1  | NRBP1     | Other | NRBP         |      | 532919    |
| 296 | NRBP2  | NRBP2     | Other | NRBP         |      | 504664    |
| 297 | KIS    | UHMK1     | Other | Other-Unique |      | 538770    |
| 298 | RNAseL | RNASEL    | Other | Other-Unique |      | 100048947 |
| 299 | SgK071 | LOC614899 | Other | Other-Unique |      | 614899    |

|     |        |           |       |              |      |        |
|-----|--------|-----------|-------|--------------|------|--------|
| 300 | SgK196 | MGC151666 | Other | Other-Unique |      | 514490 |
| 301 | SgK396 | STK31     | Other | Other-Unique |      | 781749 |
| 302 | SgK493 | PKDCC     | Other | Other-Unique |      | 539467 |
| 303 | SgK496 | RIPK5     | Other | Other-Unique |      | 534684 |
| 304 | GCN2   | GCN2      | Other | PEK          | GCN2 |        |
| 305 | PEK    | EIF2AK3   | Other | PEK          | PEK  | 535820 |
| 306 | HRI    | EIF2AK1   | Other | PEK          |      | 507689 |
| 307 | PKR    | EIF2AK2   | Other | PEK          |      | 347700 |
| 308 | PLK1   | PLK1      | Other | PLK          |      | 538238 |
| 309 | PLK2   | PLK2      | Other | PLK          |      | 539449 |
| 310 | PLK3   | PLK3      | Other | PLK          |      | 504282 |
| 311 | PLK4   | PLK4      | Other | PLK          |      | 514405 |
| 312 | PLK5   | LOC511891 | Other | PLK          |      | 511891 |
| 313 | SCYL1  | SCYL1     | Other | SCY1         |      | 515247 |
| 314 | SCYL2  | SCYL2     | Other | SCY1         |      | 782059 |
| 315 | SCYL3  | SCYL3     | Other | SCY1         |      | 506600 |
| 316 | Slob   | PXK       | Other | Slob         |      | 614093 |
| 317 | TBCK   | TBCK      | Other | TBCK         |      | 528650 |
| 318 | TLK1   | TLK1      | Other | TLK          |      | 537517 |
| 319 | TLK2   | TLK2      | Other | TLK          |      | 534705 |
| 320 | PBK    | PBK       | Other | TOPK         |      | 534781 |
| 321 | TTK    | TTK       | Other | TTK          |      | 524925 |
| 322 | Fused  | STK36     | Other | ULK          |      | 508408 |
| 323 | ULK1   | ULK1      | Other | ULK          |      | 526310 |
| 324 | ULK2   | ULK2      | Other | ULK          |      | 618601 |
| 325 | ULK3   | ULK3      | Other | ULK          |      | 506063 |
| 326 | ULK4   | ULK4      | Other | ULK          |      | 531267 |
| 327 | PIK3R4 | PIK3R4    | Other | VPS15        |      | 507414 |
| 328 | MYT1   | PKMYT1    | Other | WEE          |      | 522613 |
| 329 | Wee1   | WEE1      | Other | WEE          |      | 540322 |
| 330 | Wee1B  | WEE2      | Other | WEE          |      | 520049 |
| 331 | Wnk1   | WNK1      | Other | Wnk          |      | 506433 |
| 332 | Wnk2   | WNK2      | Other | Wnk          |      | 506520 |
| 333 | Wnk3   | WNK3      | Other | Wnk          |      | 533409 |
| 334 | Wnk4   | WNK4      | Other | Wnk          |      |        |
| 335 | ANPa   | NPR1      | RGC   | RGC          |      | 533048 |
| 336 | ANPb   | NPR2      | RGC   | RGC          |      | 281357 |
| 337 | CYGD   | GUCY2D    | RGC   | RGC          |      | 282245 |
| 338 | CYGF   | GUCY2F    | RGC   | RGC          |      | 282246 |
| 339 | HSER   | GUCY2C    | RGC   | RGC          |      | 282244 |
| 340 | MAP3K1 | MAP3K1    | STE   | STE11        |      | 523962 |
| 341 | MAP3K2 | MAP3K2    | STE   | STE11        |      | 504592 |
| 342 | MAP3K3 | MAP3K3    | STE   | STE11        |      | 508943 |
| 343 | MAP3K4 | MAP3K4    | STE   | STE11        |      | 511779 |
| 344 | MAP3K5 | MAP3K5    | STE   | STE11        |      | 537380 |
| 345 | MAP3K6 | MAP3K6    | STE   | STE11        |      | 614598 |
| 346 | MAP3K7 | MAP3K15   | STE   | STE11        |      | 529335 |
| 347 | MAP3K8 | YSK4      | STE   | STE11        |      | 538897 |
| 348 | OSR1   | OSR1      | STE   | STE20        | FRAY |        |
| 349 | STLK3  | STK39     | STE   | STE20        | FRAY | 522103 |

|     |        |            |     |            |       |           |
|-----|--------|------------|-----|------------|-------|-----------|
| 350 | GCK    | MAP4K2     | STE | STE20      | KHS   | 520058    |
| 351 | HPK1   | MAP4K1     | STE | STE20      | KHS   | 522002    |
| 352 | KHS1   | MAP4K5     | STE | STE20      | KHS   | 781335    |
| 353 | KHS2   | MAP4K3     | STE | STE20      | KHS   | 507624    |
| 354 | ZC1    | ZC1        | STE | STE20      | MSN   |           |
| 355 | ZC2    | TNIK       | STE | STE20      | MSN   | 539627    |
| 356 | ZC3    | MINK1      | STE | STE20      | MSN   | 519558    |
| 357 | ZC4    | NRK        | STE | STE20      | MSN   | 783774    |
| 358 | MST1   | STK4       | STE | STE20      | MST   | 514886    |
| 359 | MST2   | STK3       | STE | STE20      | MST   | 533815    |
| 360 | MYO3A  | MYO3A      | STE | STE20      | NinaC | 535824    |
| 361 | MYO3B  | MYO3B      | STE | STE20      | NinaC | 536123    |
| 362 | PAK1   | PAK1       | STE | STE20      | PAKA  | 533729    |
| 363 | PAK2   | LOC513673  | STE | STE20      | PAKA  | 513673    |
| 364 | PAK3   | PAK3       | STE | STE20      | PAKA  | 534526    |
| 365 | PAK4   | PAK4       | STE | STE20      | PAKB  | 539742    |
| 366 | PAK5   | PAK7       | STE | STE20      | PAKB  | 513432    |
| 367 | PAK6   | PAK6       | STE | STE20      | PAKB  | 539224    |
| 368 | LOK    | STK10      | STE | STE20      | SLK   | 526376    |
| 369 | SLK    | SLK        | STE | STE20      | SLK   | 535342    |
| 370 | STLK5  | LYK5       | STE | STE20      | STLK  | 515024    |
| 371 | STLK6  | STRADB     | STE | STE20      | STLK  | 506029    |
| 372 | TAO1   | TAOK1      | STE | STE20      | TAO   | 536532    |
| 373 | TAO2   | TAOK2      | STE | STE20      | TAO   | 533897    |
| 374 | TAO3   | TAOK3      | STE | STE20      | TAO   | 534620    |
| 375 | MST3   | STK24-LIKE | STE | STE20      | YSK   | 532455    |
| 376 | MST4   | MST4       | STE | STE20      | YSK   | 539445    |
| 377 | YSK1   | STK25      | STE | STE20      | YSK   | 373543    |
| 378 | MAP2K1 | MAP2K1     | STE | STE7       |       | 533199    |
| 379 | MAP2K2 | MAP2K2     | STE | STE7       |       | 510434    |
| 380 | MAP2K3 | MAP2K3     | STE | STE7       |       | 516039    |
| 381 | MAP2K4 | MAP2K4     | STE | STE7       |       | 526469    |
| 382 | MAP2K5 | MAP2K5     | STE | STE7       |       | 100295732 |
| 383 | MAP2K6 | MAP2K6     | STE | STE7       |       | 286883    |
| 384 | MAP2K7 | MAP2K7     | STE | STE7       |       | 787278    |
| 385 | COT    | MAP3K8     | STE | STE-Unique |       | 535622    |
| 386 | NIK    | MAP3K14    | STE | STE-Unique |       | 508367    |
| 387 | ABL    | ABL1       | TK  | Abl        |       | 540876    |
| 388 | ARG    | ABL2       | TK  | Abl        |       | 511845    |
| 389 | ACK    | ACK1       | TK  | Ack        |       | 280710    |
| 390 | TNK1   | TNK1       | TK  | Ack        |       | 510356    |
| 391 | ALK    | ALK        | TK  | Alk        |       | 536642    |
| 392 | AXL    | AXL        | TK  | Axl        |       | 516598    |
| 393 | MER    | MERTK      | TK  | Axl        |       | 504429    |
| 394 | TYRO3  | TYRO3      | TK  | Axl        |       | 788224    |
| 395 | CCK4   | PTK7       | TK  | CCK4       |       | 514819    |
| 396 | CSK    | CSK        | TK  | Csk        |       | 509246    |
| 397 | CTK    | MATK       | TK  | Csk        |       | 504668    |
| 398 | DDR1   | DDR1       | TK  | DDR        |       | 534092    |
| 399 | DDR2   | DDR2       | TK  | DDR        |       | 533523    |



|     |        |           |    |       |  |        |
|-----|--------|-----------|----|-------|--|--------|
| 400 | EGFR   | EGFR      | TK | EGFR  |  | 407217 |
| 401 | ErbB2  | ERBB2     | TK | EGFR  |  |        |
| 402 | ErbB3  | ERBB3     | TK | EGFR  |  | 785655 |
| 403 | ErbB4  | ERBB4     | TK | EGFR  |  | 522419 |
| 404 | EphA1  | EPHA1     | TK | Eph   |  | 525946 |
| 405 | EphA10 | EPHA10    | TK | Eph   |  | 540439 |
| 406 | EphA2  | EPHA2     | TK | Eph   |  | 512798 |
| 407 | EphA3  | EPHA3     | TK | Eph   |  | 537951 |
| 408 | EphA4  | EPHA4     | TK | Eph   |  | 520192 |
| 409 | EphA5  | EPHA5     | TK | Eph   |  | 538224 |
| 410 | EphA6  | EPHA6     | TK | Eph   |  | 616165 |
| 411 | EphA7  | EPHA7     | TK | Eph   |  | 538797 |
| 412 | EphA8  | EPHA8     | TK | Eph   |  | 517368 |
| 413 | EphB1  | EPHB1     | TK | Eph   |  | 534731 |
| 414 | EphB1L | LOC618263 | TK | Eph   |  | 618263 |
| 415 | EphB2  | EPHB2     | TK | Eph   |  | 535137 |
| 416 | EphB3  | EPHB3     | TK | Eph   |  | 540907 |
| 417 | EphB4  | EPHB4     | TK | Eph   |  | 515756 |
| 418 | EphB6  | EPHB6     | TK | Eph   |  | 529800 |
| 419 | FAK    | PTK2      | TK | Fak   |  | 506270 |
| 420 | PYK2   | PTK2B     | TK | Fak   |  | 541008 |
| 421 | FER    | FER       | TK | Fer   |  | 536759 |
| 422 | FERL   |           | TK | Fer   |  |        |
| 423 | FES    | FES       | TK | Fer   |  | 507304 |
| 424 | FGFR1  | FGFR1     | TK | FGFR  |  | 281768 |
| 425 | FGFR2  | FGFR2     | TK | FGFR  |  | 404193 |
| 426 | FGFR3  | FGFR3     | TK | FGFR  |  | 281769 |
| 427 | FGFR4  | FGFR4     | TK | FGFR  |  | 317696 |
| 428 | IGF1R  | IGF1R     | TK | InsR  |  | 281848 |
| 429 | INSR   | INSR      | TK | InsR  |  | 408017 |
| 430 | IRR    | INSRR     | TK | InsR  |  | 787068 |
| 431 | JAK1   | JAK1      | TK | JakA  |  | 537201 |
| 432 | JAK2   | JAK2      | TK | JakA  |  | 525246 |
| 433 | JAK3   | JAK3      | TK | JakA  |  | 538276 |
| 434 | TYK2   | TYK2      | TK | JakA  |  | 512484 |
| 435 | LMR1   | AATK      | TK | Lmr   |  | 511515 |
| 436 | LMR2   | LMTK2     | TK | Lmr   |  | 512290 |
| 437 | LMR3   | LMR3      | TK | Lmr   |  |        |
| 438 | MET    | MET       | TK | Met   |  | 280855 |
| 439 | RON    | MST1R     | TK | Met   |  | 525504 |
| 440 | MUSK   | MUSK      | TK | Musk  |  | 540052 |
| 441 | FLT3   | FLT3      | TK | PDGFR |  | 512700 |
| 442 | FMS    | FMS       | TK | PDGFR |  |        |
| 443 | KIT    | KIT       | TK | PDGFR |  | 280832 |
| 444 | PDGFRa | PDGFRA    | TK | PDGFR |  | 282301 |
| 445 | PDGFRb | PDGFRB    | TK | PDGFR |  | 527165 |
| 446 | RET    | RET       | TK | Ret   |  | 515924 |
| 447 | ROR1   | ROR1      | TK | Ror   |  | 783965 |
| 448 | ROR2   | ROR2      | TK | Ror   |  | 785924 |
| 449 | RYK    | RYK       | TK | Ryk   |  | 781353 |

|     |          |           |     |           |       |           |
|-----|----------|-----------|-----|-----------|-------|-----------|
| 450 | RYKL     |           | TK  | Ryk       |       |           |
| 451 | BLK      | BLK       | TK  | Src       |       | 532587    |
| 452 | BRK      | PTK6      | TK  | Src       |       | 529814    |
| 453 | FGR      | FGR       | TK  | Src       |       | 516133    |
| 454 | FRK      | FRK       | TK  | Src       |       | 509227    |
| 455 | FYN      | FYN       | TK  | Src       |       | 527263    |
| 456 | HCK      | HCK       | TK  | Src       |       | 280814    |
| 457 | LCK      | LCK       | TK  | Src       |       | 508890    |
| 458 | LYN      | LYN       | TK  | Src       |       | 534996    |
| 459 | SRC      | SRC       | TK  | Src       |       | 535742    |
| 460 | SRM      | SRMS      | TK  | Src       |       | 521816    |
| 461 | YES      | YES1      | TK  | Src       |       | 507632    |
| 462 | SYK      | SYK       | TK  | Syk       |       | 515515    |
| 463 | ZAP70    | ZAP70     | TK  | Syk       |       | 504509    |
| 464 | BMX      | BMX       | TK  | Tec       |       | 531514    |
| 465 | BTK      | BTK       | TK  | Tec       |       | 533459    |
| 466 | ITK      | ITK       | TK  | Tec       |       | 522311    |
| 467 | TEC      | TEC       | TK  | Tec       |       | 504733    |
| 468 | TXK      | TXK       | TK  | Tec       |       | 504782    |
| 469 | TIE1     | TIE1      | TK  | Tie       |       | 280941    |
| 470 | TIE2     | TEK       | TK  | Tie       |       | 280939    |
| 471 | SuRTK106 | STYK1     | TK  | TK-Unique |       | 513920    |
| 472 | TRKA     | NTRK1     | TK  | Trk       |       | 353111    |
| 473 | TRKB     | TRKB      | TK  | Trk       |       |           |
| 474 | TRKC     | NTRK3     | TK  | Trk       |       | 539126    |
| 475 | FLT1     | FLT1      | TK  | VEGFR     |       | 503620    |
| 476 | FLT4     | FLT4      | TK  | VEGFR     |       | 338031    |
| 477 | KDR      | KDR       | TK  | VEGFR     |       | 407170    |
| 478 | IRAK1    | IRAK1     | TKL | IRAK      |       | 533953    |
| 479 | IRAK2    | IRAK2     | TKL | IRAK      |       | 515034    |
| 480 | IRAK3    | IRAK3     | TKL | IRAK      |       | 510342    |
| 481 | IRAK4    | IRAK4     | TKL | IRAK      |       | 533692    |
| 482 | LIMK1    | LIMK1     | TKL | LISK      | LIMK  | 535225    |
| 483 | LIMK2    | LIMK2     | TKL | LISK      | LIMK  | 513539    |
| 484 | TESK1    | TESK1     | TKL | LISK      | TESK  | 527643    |
| 485 | TESK2    | TESK2     | TKL | LISK      | TESK  | 539979    |
| 486 | LRRK1    | LRRK1     | TKL | LRRK      |       | 513994    |
| 487 | LRRK2    | LRRK2     | TKL | LRRK      |       | 535652    |
| 488 | HH498    | TNNI3K    | TKL | MLK       | HH498 | 535940    |
| 489 | DLK      | DLK       | TKL | MLK       | LZK   |           |
| 490 | LZK      | MAP3K13   | TKL | MLK       | LZK   | 505369    |
| 491 | MLK1     | LOC538340 | TKL | MLK       | MLK   | 538340    |
| 492 | MLK2     | MAP3K10   | TKL | MLK       | MLK   | 781037    |
| 493 | MLK3     | MAP3K11   | TKL | MLK       | MLK   | 514210    |
| 494 | MLK4     | LOC616014 | TKL | MLK       | MLK   | 616014    |
| 495 | ZAK      | ZAK       | TKL | MLK       | MLK   | 519251    |
| 496 | TAK1     | MAP3K7    | TKL | MLK       | TAK1  | 529146    |
| 497 | ARAF     | ARAF      | TKL | RAF       |       | 540421    |
| 498 | BRAF     | BRAF      | TKL | RAF       |       | 536051    |
| 499 | KSR1     | KSR1      | TKL | RAF       |       | 100138565 |

|     |        |        |     |            |       |        |
|-----|--------|--------|-----|------------|-------|--------|
| 500 | KSR2   | KSR2   | TKL | RAF        |       | 617325 |
| 501 | RAF1   | RAF1   | TKL | RAF        |       | 521196 |
| 502 | ANKRD3 | RIPK4  | TKL | RIPK       |       | 508668 |
| 503 | RIPK1  | RIPK1  | TKL | RIPK       |       | 504727 |
| 504 | RIPK2  | RIPK2  | TKL | RIPK       |       | 534407 |
| 505 | RIPK3  | RIPK3  | TKL | RIPK       |       | 507427 |
| 506 | SgK288 | SgK288 | TKL | RIPK       |       |        |
| 507 | ALK1   | ACVRL1 | TKL | STKR       | Type1 | 534536 |
| 508 | ALK2   | ACVR1  | TKL | STKR       | Type1 | 338068 |
| 509 | ALK4   | ACVR1B | TKL | STKR       | Type1 | 539315 |
| 510 | ALK7   | ACVR1C | TKL | STKR       | Type1 | 536380 |
| 511 | BMPR1A | BMPR1A | TKL | STKR       | Type1 | 404101 |
| 512 | BMPR1B | BMPR1B | TKL | STKR       | Type1 | 407128 |
| 513 | TGFbR1 | TGFBR1 | TKL | STKR       | Type1 | 282382 |
| 514 | ACTR2  | ACVR2A | TKL | STKR       | Type2 | 281598 |
| 515 | ACTR2B | ACVR2B | TKL | STKR       | Type2 | 282131 |
| 516 | BMPR2  | BMPR2  | TKL | STKR       | Type2 | 407127 |
| 517 | MISR2  |        | TKL | STKR       | Type2 |        |
| 518 | TGFbR2 | TGFBR2 | TKL | STKR       | Type2 | 535376 |
| 519 | ILK    | ILK    | TKL | TKL-Unique | ILK   | 540207 |
| 520 | MLKL   | MLKL   | TKL | TKL-Unique |       | 790225 |
| 521 | Par-1L |        | TKL | TKL-Unique |       |        |

| <b>Protein Acc</b> | <b>RNA acc</b> | <b>Synonyms</b> |
|--------------------|----------------|-----------------|
| NP_776411.1        | NM_173986.2    | -               |
| XP_870006.1        | XM_864913.2    | -               |
| NP_001178238.1     | NM_001191309.1 |                 |
| NP_001095972.1     | NM_001102502.1 | MGC155045       |
| XP_618596.3        | XM_618596.3    | -               |
| XP_001253770.1     | XM_001253769.1 | -               |
| NP_776877.1        | NM_174452.2    | -               |
| NP_777135.1        | NM_174710.2    | GRK2            |
| NP_776925.1        | NM_174500.2    | -               |
| XP_590012.3        | XM_590012.3    | -               |
| NP_776756.1        | NM_174331.2    | GPRK5           |
| NP_776757.1        | NM_174332.3    | GPRK7           |
| NP_776598.1        | NM_174173.2    | RHOK            |
| XP_002704808.1     | XM_002704762.1 |                 |
| XP_613922.3        | XM_613922.3    | -               |
| NP_001107237.1     | NM_001113765.1 | -               |
| XP_616050.3        | XM_616050.3    | -               |
| XP_584953.3        | XM_584953.3    | -               |
| NP_001075071.1     | NM_001081602.1 | MGC155151       |
| NP_001094562.1     | NM_001101092.1 | -               |
| NP_777009.1        | NM_174584.2    | -               |
| NP_777010.1        | NM_174585.2    | -               |
| XP_582115.3        | XM_582115.3    | -               |
| XP_001788715.1     | XM_001788663.2 |                 |
| XP_606901.3        | XM_606901.3    | -               |
| NP_001071301.1     | NM_001077833.1 | -               |
| NP_776860.1        | NM_174435.1    | PKRCA           |
| NP_777012.1        | NM_174587.1    | -               |
| XP_602125.3        | XM_602125.3    | -               |
| NP_001071323.1     | NM_001077855.1 | -               |
| NP_001104590.1     | NM_001111120.1 | -               |
| NP_001070331.1     | NM_001076863.1 | -               |
| XP_582266.3        | XM_582266.3    | -               |
| NP_776861.1        | NM_174436.2    | CGKI cGKI-beta  |
| XP_612707.3        | XM_612707.3    | -               |
| NP_001073715.1     | NM_001080246.1 | MGC142408       |
| XP_883499.2        | XM_878406.2    | -               |
| XP_581630.2        | XM_581630.3    | -               |
| XP_580522.3        | XM_580522.3    | MSK1            |
| NP_001178329.1     | NM_001191400.1 |                 |
| NP_991385.1        | NM_205816.1    | -               |
| XP_582478.3        | XM_582478.3    | -               |

|                |                |                 |
|----------------|----------------|-----------------|
| XP_596135.3    | XM_596135.3    | -               |
| NP_001092407.1 | NM_001098937.1 | MGC160087       |
| NP_001077191.1 | NM_001083722.1 | MGC139400       |
| XP_604590.3    | XM_604590.3    | -               |
| XP_870724.1    | XM_865631.2    | -               |
| NP_001032549.1 | NM_001037472.1 | MGC128730       |
| XP_606198.2    | XM_606198.3    | -               |
| NP_001095503.1 | NM_001102033.1 | MGC166421       |
| NP_001069228.1 | NM_001075760.1 | MGC139463       |
| XP_870723.1    | XM_865630.2    | -               |
| NP_001098517.1 | NM_001105047.1 | MGC148827       |
| XP_607574.3    | XM_607574.3    | -               |
| XP_602539.3    | XM_602539.3    | -               |
| NP_001020491.1 | NM_001025320.1 | MGC137976       |
| NP_001098794.1 | NM_001105324.1 | PTK9L MGC148415 |
| NP_001039884.1 | NM_001046419.1 | MGC137459       |
| XP_001790539.1 | XM_001790487.1 |                 |
| NP_001070363.1 | NM_001076895.1 | MGC142877       |
| NP_001094580.1 | NM_001101110.1 |                 |
| XP_586554.2    | XM_586554.3    |                 |
| XP_870587.2    | XM_865494.3    |                 |
| XP_605991.3    | XM_605991.3    |                 |
| XP_599997.2    | XM_599997.3    | -               |
|                |                |                 |
| XP_587341.3    | XM_587341.4    |                 |
| XP_602698.4    | XM_602698.4    |                 |
| XP_001256514.1 | XM_001256513.1 |                 |
| NP_001039331.1 | NM_001045866.1 |                 |
| NP_001070341.1 | NM_001076873.1 | MGC142472       |
| XP_002704782.1 | XM_002704736.1 |                 |
| NP_001069320.1 | NM_001075852.1 | MGC151933       |
| NP_001030249.2 | NM_001035077.2 |                 |
| NP_001091466.1 | NM_001097997.1 |                 |
| NP_001014955.1 | NM_001014955.1 | PTK9            |
| NP_001039371.1 | NM_001045906.1 | MGC127910       |
| XP_607085.4    | XM_607085.4    |                 |
| NP_001069321.1 | NM_001075853.1 |                 |
| NP_001095404.1 | NM_001101934.1 | MGC166016       |
| NP_001095353.1 | NM_001101883.1 | MGC166250       |
| XP_605200.3    | XM_605200.4    |                 |
| XP_581054.3    | XM_581054.4    |                 |
| XP_879315.2    | XM_874222.3    |                 |
| XP_002694089.1 | XM_002694043.1 |                 |
| XP_603490.3    | XM_603490.4    |                 |
| XP_583735.3    | XM_583735.3    |                 |
| XP_594442.2    | XM_594442.3    | -               |
| NP_001178220.1 | NM_001191291.1 |                 |
| NP_001069304.1 | NM_001075836.1 | MGC138071       |
| XP_580963.3    | XM_580963.3    |                 |
| XP_001250500.1 | XM_001250499.2 |                 |

|                |                |                     |
|----------------|----------------|---------------------|
|                |                |                     |
| XP_617403.3    | XM_617403.4    |                     |
| NP_001070336.1 | NM_001076868.1 | MGC142688           |
| NP_001069787.1 | NM_001076319.1 | MGC142416           |
| XP_002692107.1 | XM_002692061.1 | -                   |
| NP_001070304.1 | NM_001076836.1 | MGC142748           |
| NP_001069406.1 | NM_001075938.1 | MGC139375 MGC155201 |
| NP_001030434.1 | NM_001035357.1 | MGC128545           |
| NP_001039798.1 | NM_001046333.1 | MGC128576           |
| NP_001091033.1 | NM_001097564.1 | -                   |
| XP_002691060.1 | XM_002691014.1 | -                   |
| NP_001103272.1 | NM_001109802.1 | MGC165837           |
| XP_583885.3    | XM_583885.3    | -                   |
| XP_618200.3    | XM_618200.3    | -                   |
| XP_615982.3    | XM_615982.3    | -                   |
| NP_001091492.1 | NM_001098023.1 | -                   |
| XP_617816.3    | XM_617816.3    | -                   |
| XP_593229.3    | XM_593229.3    | -                   |
| XP_588081.3    | XM_588081.3    | -                   |
| NP_001095652.1 | NM_001102182.1 | MGC140219           |
| XP_614792.3    | XM_614792.3    | -                   |
| NP_001030436.1 | NM_001035359.1 | -                   |
| XP_875908.2    | XM_870815.2    | -                   |
| NP_001104730.1 | NM_001111260.1 | -                   |
| XP_608675.2    | XM_608675.3    | -                   |
| XP_001789835.1 | XM_001789783.1 |                     |
| XP_001256004.1 | XM_001256003.1 | -                   |
| XP_589604.3    | XM_589604.3    | -                   |
| XP_588111.3    | XM_588111.3    | -                   |
| XP_582999.3    | XM_582999.3    | -                   |
|                |                |                     |
| XP_002702780.1 | XM_002702734.1 |                     |
| NP_001069195.1 | NM_001075727.1 | MGC139116           |
| NP_001069376.1 | NM_001075908.1 | MGC139553           |
| NP_001069344.1 | NM_001075876.1 | MGC142730           |
| NP_001095951.1 | NM_001102481.1 | MGC139144           |
| XP_613544.3    | XM_613544.3    | -                   |
| XP_002690922.1 | XM_002690876.1 | -                   |
| NP_001094594.1 | NM_001101124.1 | -                   |
| NP_001076891.1 | NM_001083422.1 | MGC140096           |
| NP_001033169.1 | NM_001038080.1 | MGC134048           |
|                |                |                     |
| XP_616231.3    | XM_616231.3    | -                   |
| XP_583775.3    | XM_583775.3    | -                   |
| XP_001255255.1 | XM_001255254.1 | -                   |
| NP_001029951.1 | NM_001034779.1 | MGC127030           |
| XP_615733.3    | XM_615733.3    | -                   |
| NP_001030435.1 | NM_001035358.1 | MGC133983           |
| XP_580870.3    | XM_580870.3    | -                   |
| XP_604749.3    | XM_604749.3    | -                   |

|                |                |            |
|----------------|----------------|------------|
| XP_596207.3    | XM_596207.3    | -          |
| NP_001077188.1 | NM_001083719.1 | MGC155182  |
| NP_788809.1    | NM_176636.2    | -          |
| XP_002703630.1 | XM_002703584.1 |            |
| NP_001039951.1 | NM_001046486.1 | MGC137450  |
| NP_001039593.1 | NM_001046128.1 | MGC129049  |
| NP_776569.1    | NM_174144.2    | -          |
| XP_585196.3    | XM_585196.3    | -          |
| XP_002688056.1 | XM_002688010.1 |            |
| XP_612625.3    | XM_612625.3    | -          |
| XP_001251452.1 | XM_001251451.1 | -          |
| XP_580387.3    | XM_580387.3    | -          |
| NP_001068881.1 | NM_001075413.1 | -          |
| NP_001029703.1 | NM_001034531.1 | -          |
| NP_001094575.1 | NM_001101105.1 | -          |
| NP_847887.2    | NM_178317.3    | TRB-2 TRB2 |
| NP_001069571.1 | NM_001076103.1 | MGC142660  |
| XP_585000.3    | XM_585000.3    | -          |
| XP_873585.2    | XM_868492.2    | -          |
| NP_001178293.1 | NM_001191364.1 |            |
| NP_001095682.1 | NM_001102212.1 | MGC154976  |
| XP_588888.3    | XM_588888.3    | -          |
| NP_001077179.1 | NM_001083710.1 | TSSK2      |
|                |                |            |
| XP_581847.2    | XM_581847.3    | -          |
| XP_870097.1    | XM_865004.2    | -          |
| XP_601315.3    | XM_601315.3    | -          |
| NP_777136.1    | NM_174711.2    | MGC133860  |
| NP_001091628.1 | NM_001098159.1 |            |
| NP_001095550.1 | NM_001102080.1 | MGC166392  |
| NP_001071577.1 | NM_001078109.1 | MGC143296  |
| NP_001033235.1 | NM_001038146.1 | MGC134312  |
| NP_001094526.1 | NM_001101056.1 | -          |
|                |                |            |
|                |                |            |
| XP_615092.2    | XM_615092.3    | -          |
| NP_001033313.1 | NM_001038224.1 | MGC128186  |
| NP_001069319.1 | NM_001075851.1 | -          |
| NP_001039716.1 | NM_001046251.1 | MGC133825  |
| NP_776441.1    | NM_174016.2    | MGC134454  |
| NP_001014934.1 | NM_001014934.1 | -          |
| NP_001092648.1 | NM_001099178.1 | MGC160000  |
| NP_001033666.1 | NM_001038577.2 | MGC134436  |
| NP_001032683.1 | NM_001037594.1 | MGC133903  |
| XP_589151.3    | XM_589151.3    | -          |
| NP_776442.1    | NM_174017.2    | MGC140720  |
| NP_001069183.1 | NM_001075715.1 | MGC140417  |
| XP_589209.3    | XM_589209.3    | -          |
| XP_583707.3    | XM_583707.3    | -          |
| NP_001014935.2 | NM_001014935.2 | MGC139578  |

|                |                |                     |
|----------------|----------------|---------------------|
| XP_001251167.1 | XM_001251166.1 | -                   |
| XP_588861.2    | XM_588861.3    | -                   |
| NP_001007812.2 | NM_001007811.2 | -                   |
| NP_001094696.1 | NM_001101226.1 | -                   |
| XP_588580.3    | XM_588580.3    | -                   |
| NP_001076942.1 | NM_001083473.1 | MGC155091           |
| XP_001789714.2 | XM_001789662.2 | PFTK1               |
| XP_873177.3    | XM_868084.3    | PFTK2               |
| NP_001092403.1 | NM_001098933.1 | MGC154961 MGC166397 |
| NP_001094586.1 | NM_001101116.1 | -                   |
| NP_001096744.1 | NM_001103274.1 | MGC142906           |
| NP_001179783.1 | NM_001192854.1 | -                   |
| NP_001033218.1 | NM_001038129.1 | MGC133738           |
| XP_002700425.1 | XM_002700379.1 | -                   |
| NP_001095741.1 | NM_001102271.1 | MGC148790           |
| XP_874270.2    | XM_869177.2    | -                   |
| NP_001029420.1 | NM_001034248.1 | MGC128892           |
| XP_870005.1    | XM_864912.2    | -                   |
| XP_612233.2    | XM_612233.3    | -                   |
| NP_001074984.1 | NM_001081515.1 | DYRK1A MGC155217    |
| XP_592833.3    | XM_592833.3    | -                   |
| NP_001093768.1 | NM_001100298.1 | -                   |
| XP_609767.3    | XM_609767.3    | -                   |
| XP_001250674.1 | XM_001250673.1 | -                   |
| NP_001095392.1 | NM_001101922.1 | MGC152387           |
| XP_870428.2    | XM_865335.2    | -                   |
| XP_598392.3    | XM_598392.3    | -                   |
| NP_001069025.1 | NM_001075557.1 | MGC139658           |
| NP_001095662.1 | NM_001102192.1 | MGC159759           |
| NP_001094780.1 | NM_001101310.1 | -                   |
| NP_001103488.1 | NM_001110018.1 | ERK1                |
| NP_786987.1    | NM_175793.2    | ERK2                |
| XP_605323.3    | XM_605323.3    | -                   |
| NP_001069388.1 | NM_001075920.1 | MGC152151           |
| NP_001092550.1 | NM_001099080.1 | MGC148520           |
| NP_001039575.1 | NM_001046110.1 | MGC138052           |
| XP_869760.1    | XM_864667.2    | JNK1                |
| NP_001039834.1 | NM_001046369.1 | MGC137545           |
| NP_001077197.1 | NM_001083728.1 | -                   |
| XP_886284.2    | XM_881191.2    | -                   |
| NP_001095644.1 | NM_001102174.1 | MGC142910           |
| NP_001073804.1 | NM_001080335.1 | MGC139500           |
| NP_001014947.1 | NM_001014947.1 | -                   |
| NP_001092423.1 | NM_001098953.1 | MGC160082           |
| NP_001092357.1 | NM_001098887.1 | MGC157129           |
| NP_001039880.2 | NM_001046415.2 | -                   |
| XP_873352.1    | XM_868259.2    | -                   |
| NP_001076859.1 | NM_001083390.1 | MGC143354 MSSK1     |
| XP_590178.3    | XM_590178.3    | -                   |
| XP_590213.3    | XM_590213.3    | -                   |



|                |                |                  |
|----------------|----------------|------------------|
| NP_001033117.1 | NM_001038028.1 | MGC134472        |
| NP_898907.2    | NM_183084.2    | MGC142782 STK12  |
| XP_876025.1    | XM_870932.2    | -                |
|                |                |                  |
| NP_001095481.1 | NM_001102011.1 | MGC148432        |
| XP_617181.3    | XM_617181.3    | -                |
| NP_001092650.1 | NM_001099180.1 | MGC159543        |
| XP_587386.3    | XM_587386.3    | -                |
| NP_001068858.1 | NM_001075390.1 | MGC139717        |
| NP_001032545.1 | NM_001037468.1 | CDC7L1 MGC128732 |
| NP_777060.2    | NM_174635.2    | MGC137728        |
| NP_777061.1    | NM_174636.2    | -                |
| NP_001070012.1 | NM_001076544.1 | MGC137325        |
| NP_776446.1    | NM_174021.2    | -                |
| NP_776778.1    | NM_174353.2    | -                |
| NP_001039810.1 | NM_001046345.1 | MGC137373        |
| XP_612449.3    | XM_612449.3    | -                |
|                |                |                  |
|                |                |                  |
| XP_590874.2    | XM_590874.3    | C-MOS            |
| XP_611658.3    | XM_611658.3    | -                |
|                |                |                  |
| NP_001039549.1 | NM_001046084.1 | MGC127293        |
| NP_001039720.1 | NM_001046255.1 | MGC137500        |
|                |                |                  |
| XP_600615.3    | XM_600615.3    | -                |
| XP_871668.2    | XM_866575.2    | -                |
| NP_001039735.1 | NM_001046270.1 | MGC137163        |
| NP_001077112.1 | NM_001083643.1 | MGC143098        |
| NP_001095414.1 | NM_001101944.1 | MGC159441        |
| XM_001788409.1 | XP_001788461.1 |                  |
| NP_001092458.1 | NM_001098988.1 | MGC149008        |
| XP_001249770.1 | XM_001249769.1 | -                |
| XP_610844.3    | XM_610844.3    | -                |
| XP_614489.3    | XM_614489.3    | -                |
| XP_871544.2    | XM_866451.2    | -                |
| XP_871937.2    | XM_866844.3    | -                |
| XP_001256345.1 | XM_001256344.1 | -                |
| NP_001093171.1 | NM_001099701.1 | -                |
|                |                |                  |
|                |                |                  |
| NP_001107240.1 | NM_001113768.1 | -                |
| XP_587377.2    | XM_587377.3    | -                |
| XP_001253752.1 | XM_001253751.1 | -                |
| XP_601098.3    | XM_601098.3    | -                |
| NP_001070357.1 | NM_001076889.1 | MGC139974        |
| XP_001256461.1 | XM_001256460.1 | -                |
| XP_582577.2    | XM_582577.3    | -                |
| NP_001091634.1 | NM_001098165.1 | -                |
| XP_871637.2    | XM_866544.2    | -                |

|                |                |           |
|----------------|----------------|-----------|
| NP_001091496.1 | NM_001098027.1 | -         |
| XP_001250240.1 | XM_001250239.1 | -         |
| XP_002700787.1 | XM_002700741.1 | -         |
| NP_001019995.1 | NM_001024824.1 | -         |
|                |                |           |
| NP_001091555.1 | NM_001098086.1 | -         |
| NP_001033142.1 | NM_001038053.1 | MGC134528 |
| NP_835210.2    | NM_178109.2    | PKR PRKR  |
| NP_001033262.1 | NM_001038173.1 | MGC133927 |
| XP_587229.3    | XM_587229.3    | -         |
| NP_001068621.1 | NM_001075153.1 | MGC142543 |
| NP_001076896.1 | NM_001083427.1 | PLK-4     |
| XP_589317.3    | XM_589317.3    | -         |
| NP_001095491.1 | NM_001102021.1 | MGC165975 |
| NP_001095999.1 | NM_001102529.1 | MGC138084 |
| XP_001787951.1 | XM_001787899.1 |           |
| NP_001092602.1 | NM_001099132.1 | MGC139332 |
| XP_607080.3    | XM_607080.3    | -         |
| XP_617685.3    | XM_617685.3    | -         |
| XP_614568.3    | XM_614568.3    | -         |
| NP_001095648.1 | NM_001102178.1 | MGC165897 |
| XP_603264.3    | XM_603264.3    | -         |
| XP_585177.3    | XM_585177.3    | -         |
| XP_604678.3    | XM_604678.3    | -         |
| NP_001095791.1 | NM_001102321.1 |           |
| NP_001039399.2 | NM_001045934.2 |           |
| XP_609757.3    | XM_609757.3    | -         |
| NP_001093784.1 | NM_001100314.1 | -         |
| XP_600897.2    | XM_600897.3    | -         |
| NP_001094675.1 | NM_001101205.1 | -         |
| XP_598279.3    | XM_598279.3    | -         |
| XP_582882.3    | XM_582882.3    | -         |
| XP_582977.3    | XM_582977.3    | -         |
| XP_612806.5    | XM_612806.3    | -         |
|                |                |           |
| XP_612318.2    | XM_612318.3    | -         |
| NP_776551.1    | NM_174126.2    | -         |
| NP_776973.1    | NM_174548.2    | -         |
| NP_776974.1    | NM_174549.2    | -         |
| NP_776972.1    | NM_174547.2    | -         |
| XP_602275.3    | XM_602275.3    | -         |
| XP_580739.2    | XM_580739.3    | -         |
| XP_886022.2    | XM_880929.2    | -         |
| XP_589178.3    | XM_589178.3    | -         |
| NP_001137553.1 | NM_001144081.1 | ASK1      |
| XP_882494.1    | XM_877401.2    | -         |
| XP_607781.3    | XM_607781.3    | -         |
| XP_583510.2    | XM_583510.2    | -         |
|                |                |           |
| NP_001069294.1 | NM_001075826.1 | -         |

|                |                |                     |
|----------------|----------------|---------------------|
| XP_874795.2    | XM_869702.2    | -                   |
| NP_001069293.2 | NM_001075825.2 | -                   |
| XP_001249611.1 | XM_001249610.1 | -                   |
| XP_584270.3    | XM_584270.3    | -                   |
|                |                | HGK                 |
| XP_588438.3    | XM_588438.3    | -                   |
| NP_001092846.1 | NM_001099376.1 | MINK                |
| XP_001251137.1 | XM_001251136.1 | -                   |
| NP_001015602.1 | NM_001015602.1 | -                   |
| XP_001250083.1 | XM_001250082.1 | -                   |
| XP_615938.3    | XM_615938.3    | -                   |
| XP_616244.3    | XM_616244.3    | -                   |
| NP_001070366.1 | NM_001076898.1 | MGC139676           |
| XP_591400.3    | XM_591400.3    | -                   |
| XP_001252146.1 | XM_001252145.1 | -                   |
| NP_001069652.1 | NM_001076184.1 | MGC138047           |
| XP_591106.3    | XM_591106.3    | -                   |
| XP_585734.1    | XM_585734.3    | -                   |
| XP_604746.3    | XM_604746.3    | -                   |
| XP_001252985.1 | XM_001252984.1 | -                   |
| NP_001015603.1 | NM_001015603.1 | -                   |
| XP_582418.3    | XM_582418.3    | -                   |
| XP_616664.3    | XM_616664.3    | -                   |
| XP_872869.2    | XM_867776.2    | -                   |
| XP_614451.3    | XM_614451.3    | -                   |
| XP_610976.3    | XM_610976.3    | -                   |
| XP_587191.3    | XM_587191.3    | -                   |
| NP_899666.1    | NM_183407.2    | MGC128993           |
| XP_612526.3    | XM_612526.3    | -                   |
| NP_001033160.2 | NM_001038071.2 | MGC134398 MGC140486 |
| NP_001077162.1 | NM_001083693.1 | MGC151903           |
| NP_001092508.1 | NM_001099038.1 | MGC140244           |
| XP_002700545.1 | XM_002700499.1 |                     |
| NP_001029217.1 | NM_001034045.1 | -                   |
| XP_001254724.1 | XM_001254723.3 | -                   |
| NP_001092541.1 | NM_001099071.1 | MGC159463           |
| XP_585134.3    | XM_585134.3    | -                   |
| XP_613548.2    | XM_613548.3    | -                   |
| XP_001253285.1 | XM_001253284.1 | ABLL                |
| NP_776310.2    | NM_173885.2    | ACK MGC137695       |
| XP_881345.1    | XM_876252.2    | -                   |
| XP_616782.3    | XM_616782.3    | -                   |
| XP_594754.3    | XM_594754.3    | -                   |
| XP_580552.3    | XM_580552.3    | -                   |
| XP_001253887.1 | XM_001253886.1 | -                   |
| XP_869603.2    | XM_864510.2    | -                   |
| NP_001068865.1 | NM_001075397.1 | MGC142896           |
| NP_001030183.1 | NM_001035011.1 | -                   |
| NP_001069480.2 | NM_001076012.2 | -                   |
| NP_001077189.1 | NM_001083720.1 | MGC140218           |

|                |                |                      |
|----------------|----------------|----------------------|
| XP_592211.3    | XM_592211.3    | -                    |
|                |                |                      |
| NP_001096575.1 | NM_001103105.1 | MGC143211            |
| XP_002703751.1 | XM_002703705.1 |                      |
| XP_604305.2    | XM_604305.3    | 525946               |
| XP_594054.3    | XM_594054.3    | -                    |
| XP_590380.3    | XM_590380.3    | -                    |
| XP_618140.3    | XM_618140.3    | -                    |
| NP_001076910.1 | NM_001083441.1 |                      |
| XP_618422.3    | XM_618422.3    | -                    |
| XP_001788053.1 | XM_001788001.2 | -                    |
| XP_611161.3    | XM_611161.3    | -                    |
| XP_595537.3    | XM_595537.3    | -                    |
| XP_614602.3    | XM_614602.3    | -                    |
| XP_875687.2    | XM_870594.2    | -                    |
| NP_001178427.1 | NM_001191498.1 |                      |
| XP_613645.2    | XM_613645.3    | -                    |
| XP_874493.2    | XM_869400.2    | -                    |
| NP_001091536.2 | NM_001098067.1 |                      |
| NP_001068718.2 | NM_001075250.2 | FADK                 |
| NP_001095722.1 | NM_001102252.1 | MGC139227            |
| NP_001178265.1 | NM_001191336.1 | -                    |
|                |                |                      |
| NP_001027471.1 | NM_001032300.1 | -                    |
| NP_001103677.1 | NM_001110207.1 | MGC151817            |
| XP_885574.2    | XM_880481.2    | FGFR                 |
| NP_776743.1    | NM_174318.3    | -                    |
| XP_602166.3    | XM_602166.3    | -                    |
| XP_606794.3    | XM_606794.3    | -                    |
| XP_590552.2    | XM_590552.3    | ir-A                 |
| XP_001254386.1 | XM_001254385.1 | -                    |
| XP_001790676.2 | XM_001790624.2 |                      |
| XP_002689649.1 | XM_002689603.1 | -                    |
| XP_002704759.1 | XM_002704713.1 |                      |
| NP_001107236.1 | NM_001113764.1 | -                    |
| XP_588863.3    | XM_588863.3    | -                    |
| XP_589779.3    | XM_589779.3    | -                    |
|                |                |                      |
| NP_001013017.2 | NM_001012999.2 | HGFR MGC166072 c-met |
| XP_603857.3    | XM_603857.3    | -                    |
| XP_591182.3    | XM_591182.3    | -                    |
| XP_590263.3    | XM_590263.3    | -                    |
|                |                |                      |
| XP_612028.3    | XM_612028.3    | c-kit                |
| XP_590921.3    | XM_590921.3    | -                    |
| NP_001069364.2 | NM_001075896.2 |                      |
| XP_002703399.1 | XM_002703353.1 |                      |
| XP_001789312.2 | XM_001789260.2 | -                    |
| NP_001098934.2 | NM_001105464.2 |                      |
| XP_001249767.1 | XM_001249766.1 | -                    |

|                |                |                  |
|----------------|----------------|------------------|
| NP_001069436.1 | NM_001075968.1 | MGC142356        |
| XP_608273.2    | XM_608273.2    | -                |
| NP_001092461.1 | NM_001098991.1 | MGC159776        |
| XP_586141.3    | XM_586141.3    | -                |
| NP_001071440.1 | NM_001077972.1 | -                |
| NP_001103664.1 | NM_001110194.1 | -                |
| NP_001029506.1 | NM_001034334.1 | MGC126900        |
| XP_614963.2    | XM_614963.3    | -                |
| NP_001104274.1 | NM_001110804.1 | -                |
| XP_600086.3    | XM_600086.3    | -                |
| NP_001094530.1 | NM_001101060.1 | -                |
| NP_001032542.1 | NM_001037465.1 | MGC127145        |
| XP_870655.1    | XM_865562.2    | -                |
| NP_001179636.1 | NM_001192707.1 | -                |
| NP_001029761.1 | NM_001034589.1 | MGC126902        |
| NP_001098858.1 | NM_001105388.1 | MGC165932        |
| XP_580898.3    | XM_580898.3    | -                |
| XP_870050.2    | XM_864957.2    | -                |
| NP_776390.1    | NM_173965.2    | TIE              |
| NP_776389.1    | NM_173964.2    | MGC139569        |
| XP_591681.3    | XM_591681.3    | SYTK1            |
| XP_613650.2    | XM_613650.3    | TRKA             |
|                |                |                  |
| XP_002696558.1 | XM_002696512.1 | -                |
| NP_001178061.1 | NM_001191132.1 | VEGFR1           |
| NP_001178273.1 | NM_001191344.1 |                  |
| NP_001103470.1 | NM_001110000.1 | VEGFR2 flk-1     |
| NP_001035645.1 | NM_001040555.1 | -                |
| NP_001069164.1 | NM_001075696.1 | IRAK-2           |
| XP_587469.2    | XM_587469.3    | -                |
| NP_001069466.1 | NM_001075998.1 | IRAK-4 MGC137816 |
| XP_002698230.1 | XM_002698184.1 |                  |
| NP_001033187.1 | NM_001038098.1 | MGC134164        |
| XP_606040.2    | XM_606040.3    | -                |
| XP_590674.3    | XM_590674.3    | -                |
| XP_591774.3    | XM_591774.3    | -                |
| XP_615760.3    | XM_615760.3    | -                |
| XP_001250856.1 | XM_001250855.1 | MGC152244        |
|                |                |                  |
| NP_001095323.1 | NM_001101853.1 | MGC179376        |
| XP_002691037.1 | XM_002690991.1 | -                |
| XP_001249388.1 | XM_001249387.1 | -                |
| NP_001095461.1 | NM_001101991.1 | MGC165851        |
| XP_873070.2    | XM_867977.2    | -                |
| XP_870499.1    | XM_865406.2    | -                |
| NP_001075064.1 | NM_001081595.1 | MGC154981        |
| NP_001014964.1 | NM_001014964.1 | MGC128775        |
| XP_002687048.1 | XM_002687002.1 | -                |
| XP_001788801.1 | XM_001788749.1 |                  |

|                |                |                            |
|----------------|----------------|----------------------------|
| XP_874651.2    | XM_869558.2    | -                          |
| NP_001095975.1 | NM_001102505.1 | MGC165882                  |
| NP_001093797.1 | NM_001100327.1 | -                          |
| NP_001030184.1 | NM_001035012.1 | MGC127532                  |
| NP_001029782.1 | NM_001034610.1 | MGC127456                  |
| NP_001095354.1 | NM_001101884.1 | MGC152488                  |
|                |                |                            |
| NP_001076948.1 | NM_001083479.1 | MGC139457                  |
| NP_788836.2    | NM_176663.3    | ActR-IA                    |
| XP_586402.3    | XM_586402.3    | -                          |
| XP_616508.3    | XM_616508.3    | -                          |
| NP_001070268.1 | NM_001076800.1 | BMPR-IA                    |
| NP_001098798.1 | NM_001105328.1 | ALK6 BMP15 BMPR-IB BMPRIIB |
| NP_777046.1    | NM_174621.2    | -                          |
| NP_776652.1    | NM_174227.3    | ACVR2                      |
| NP_776920.1    | NM_174495.2    | ActR-IIB ActRIIB           |
| XP_617592.3    | XM_617592.3    | bmprii                     |
|                |                |                            |
| XP_615445.2    | XM_615445.3    | -                          |
| NP_001029865.1 | NM_001034693.1 | MGC129022                  |
| XP_001256760.1 | XM_001256759.1 | -                          |
|                |                |                            |

| Description                                             |
|---------------------------------------------------------|
| v-akt murine thymoma viral oncogene homolog 1           |
| v-akt murine thymoma viral oncogene homolog 2           |
| v-akt murine thymoma viral oncogene homolog 3           |
|                                                         |
| CDC42 binding protein kinase gamma                      |
| CDC42 binding protein kinase alpha (DMPK-like)          |
|                                                         |
| Rho-associated, coiled-coil containing protein kinase 1 |
| Rho-associated, coiled-coil containing protein kinase 2 |
|                                                         |
| adrenergic, beta, receptor kinase 1                     |
| adrenergic, beta, receptor kinase 2                     |
| G protein-coupled receptor kinase 4                     |
| G protein-coupled receptor kinase 5                     |
|                                                         |
| G protein-coupled receptor kinase 7                     |
| G protein-coupled receptor kinase 1                     |
| microtubule associated serine/threonine kinase 1        |
|                                                         |
| microtubule associated serine/threonine kinase 3        |
|                                                         |
| microtubule associated serine/threonine kinase-like     |
|                                                         |
| LATS, large tumor suppressor, homolog 1 (Drosophila)    |
| LATS, large tumor suppressor, homolog 2 (Drosophila)    |
| serine/threonine kinase 38                              |
| serine/threonine kinase 38 like                         |
| protein kinase, cAMP-dependent, catalytic, alpha        |
| protein kinase, cAMP-dependent, catalytic, beta         |
| protein kinase, X-linked                                |
| 3-phosphoinositide dependent protein kinase-1           |
| protein kinase C, iota                                  |
| protein kinase C, zeta                                  |
| protein kinase C, alpha                                 |
| protein kinase C, beta 1                                |
| protein kinase C, gamma                                 |
| protein kinase C, delta                                 |
| protein kinase C, epsilon                               |
| protein kinase C, eta                                   |
| protein kinase C, theta                                 |
| protein kinase, cGMP-dependent, type I                  |
| protein kinase, cGMP-dependent, type II                 |
| protein kinase N1                                       |
| protein kinase N2                                       |
| protein kinase N3                                       |
| ribosomal protein S6 kinase, 90kDa, polypeptide 5       |
| ribosomal protein S6 kinase, 90kDa, polypeptide 4       |
| ribosomal protein S6 kinase, 70kDa, polypeptide 1       |
| ribosomal protein S6 kinase, 70kDa, polypeptide 2       |

|                                                                                  |
|----------------------------------------------------------------------------------|
| ribosomal protein S6 kinase, 90kDa, polypeptide 2                                |
| ribosomal protein S6 kinase, 90kDa, polypeptide 3                                |
| ribosomal protein S6 kinase, 90kDa, polypeptide 1                                |
| ribosomal protein S6 kinase, 90kDa, polypeptide 6                                |
| ribosomal protein S6 kinase, 52kDa, polypeptide 1                                |
| ribosomal protein S6 kinase-like 1                                               |
| similar to Putative serine/threonine-protein kinase F31E3.2                      |
| serum/glucocorticoid regulated kinase 1                                          |
| serum/glucocorticoid regulated kinase 2                                          |
| serum/glucocorticoid regulated kinase family, member 3                           |
| serine/threonine kinase 32A                                                      |
| serine/threonine kinase 32B                                                      |
| serine/threonine kinase 32C                                                      |
| twinfilin, actin-binding protein, homolog 1 (Drosophila)                         |
| twinfilin, actin-binding protein, homolog 2 (Drosophila)                         |
| chaperone, ABC1 activity of bc1 complex homolog (S. pombe)                       |
| aarF domain containing kinase 4                                                  |
| aarF domain containing kinase 1                                                  |
| aarF domain containing kinase 5                                                  |
| aarF domain containing kinase 2                                                  |
| transient receptor potential cation channel, subfamily M, member 7               |
| transient receptor potential cation channel, subfamily M, member 6               |
| eukaryotic elongation factor-2 kinase                                            |
| alpha-kinase 2                                                                   |
| alpha-kinase 1                                                                   |
| breakpoint cluster region                                                        |
| bromodomain containing 2                                                         |
| bromodomain containing 3                                                         |
| bromodomain containing 4                                                         |
| bromodomain, testis-specific                                                     |
| Fas-activated serine/threonine kinase                                            |
| serine/threonine kinase 19                                                       |
| heat shock 22kDa protein 8                                                       |
| branched chain ketoacid dehydrogenase kinase                                     |
| pyruvate dehydrogenase kinase, isozyme 1                                         |
| pyruvate dehydrogenase kinase, isozyme 2                                         |
| pyruvate dehydrogenase kinase, isozyme 3                                         |
| pyruvate dehydrogenase kinase, isozyme 4                                         |
| ataxia telangiectasia mutated                                                    |
| ataxia telangiectasia and Rad3 related                                           |
| protein kinase, DNA-activated, catalytic polypeptide                             |
| mechanistic target of rapamycin (serine/threonine kinase)                        |
| SMG1 homolog, phosphatidylinositol 3-kinase-related kinase (C. elegans)          |
| transformation/transcription domain-associated protein                           |
| RIO kinase 1 (yeast)                                                             |
| RIO kinase 2 (yeast)                                                             |
| RIO kinase 3 (yeast)                                                             |
| TAF1 RNA polymerase II, TATA box binding protein (TBP)-associated factor, 250kDa |
| tripartite motif-containing 33                                                   |



|                                                                                          |
|------------------------------------------------------------------------------------------|
|                                                                                          |
| tripartite motif-containing 24                                                           |
| calcium/calmodulin-dependent protein kinase I                                            |
| pregnancy upregulated non-ubiquitously expressed CaM kinase                              |
| similar to Calcium/calmodulin-dependent protein kinase ID                                |
| calcium/calmodulin-dependent protein kinase IG                                           |
| calcium/calmodulin-dependent protein kinase (CaM kinase) II alpha                        |
| calcium/calmodulin-dependent protein kinase (CaM kinase) II beta                         |
| calcium/calmodulin-dependent protein kinase (CaM kinase) II delta                        |
| calcium/calmodulin-dependent protein kinase (CaM kinase) II gamma                        |
| similar to Calcium/calmodulin-dependent protein kinase type IV (CAM kinase-GR) (CaMK IV) |
| protein kinase, AMP-activated, alpha 1 catalytic subunit                                 |
| protein kinase, AMP-activated, alpha 2 catalytic subunit                                 |
| BR serine/threonine kinase 1                                                             |
| BR serine/threonine kinase 2                                                             |
| CHK1 checkpoint homolog ( <i>S. pombe</i> )                                              |
| hormonally upregulated Neu-associated kinase                                             |
| serine/threonine kinase 11                                                               |
| MAP/microtubule affinity-regulating kinase 1                                             |
| MAP/microtubule affinity-regulating kinase 2                                             |
| MAP/microtubule affinity-regulating kinase 3                                             |
| MAP/microtubule affinity-regulating kinase 4                                             |
| hypothetical LOC618482                                                                   |
| maternal embryonic leucine zipper kinase                                                 |
| hypothetical LOC530210                                                                   |
| NUAK family, SNF1-like kinase, 1                                                         |
| NUAK family, SNF1-like kinase, 2                                                         |
| PAS domain containing serine/threonine kinase                                            |
| SNF1-like kinase 2                                                                       |
| similar to KIAA0999 protein                                                              |
|                                                                                          |
| SNF related kinase                                                                       |
| serine/threonine kinase 40                                                               |
| serine/threonine kinase 33                                                               |
| CaM kinase-like vesicle-associated                                                       |
| calcium/calmodulin-dependent serine protein kinase (MAGUK family)                        |
| death-associated protein kinase 1                                                        |
| death-associated protein kinase 2                                                        |
| death-associated protein kinase 3                                                        |
| serine/threonine kinase 17a                                                              |
| serine/threonine kinase 17b                                                              |
|                                                                                          |
| doublecortin-like kinase 2                                                               |
| doublecortin-like kinase 3                                                               |
| mitogen-activated protein kinase-activated protein kinase 2                              |
| mitogen-activated protein kinase-activated protein kinase 3                              |
| mitogen-activated protein kinase-activated protein kinase 5                              |
| MAP kinase interacting serine/threonine kinase 1                                         |
| MAP kinase interacting serine/threonine kinase 2                                         |
| myosin light chain kinase 3                                                              |

|                                                                |
|----------------------------------------------------------------|
| myosin light chain kinase family, member 4                     |
| myosin light chain kinase 2                                    |
| myosin light chain kinase                                      |
| titin                                                          |
| phosphorylase kinase, gamma 1 (muscle)                         |
| phosphorylase kinase, gamma 2 (testis)                         |
| pim-1 oncogene                                                 |
| pim-2 oncogene                                                 |
| serine/threonine protein kinase pim-3-like                     |
| protein kinase D1                                              |
| protein kinase D2                                              |
| protein kinase D3                                              |
| protein serine kinase H1                                       |
| CHK2 checkpoint homolog (S. pombe)                             |
| tribbles homolog 1 (Drosophila)                                |
| tribbles homolog 2 (Drosophila)                                |
| tribbles homolog 3 (Drosophila)                                |
| obscurin, cytoskeletal calmodulin and titin-interacting RhoGEF |
| SPEG complex locus                                             |
| kalirin, RhoGEF kinase                                         |
| triple functional domain (PTPRF interacting)                   |
| testis-specific serine kinase 6                                |
| testis-specific serine kinase 2                                |
| testis-specific serine kinase 3                                |
| testis-specific serine kinase 4                                |
| similar to testis-specific serine kinase 5                     |
| casein kinase 1, alpha 1                                       |
| casein kinase I beta                                           |
| casein kinase 1, delta                                         |
| casein kinase 1, epsilon                                       |
| casein kinase 1, gamma 1                                       |
| casein kinase 1, gamma 2                                       |
|                                                                |
| tau tubulin kinase 2                                           |
| vaccinia related kinase 1                                      |
| vaccinia related kinase 2                                      |
| vaccinia related kinase 3                                      |
| cell division cycle 2, G1 to S and G2 to M                     |
| cyclin-dependent kinase 2                                      |
| cyclin-dependent kinase 3                                      |
| cyclin-dependent kinase 10                                     |
| cyclin-dependent kinase 4                                      |
| cyclin-dependent kinase 6                                      |
| cyclin-dependent kinase 5                                      |
| cyclin-dependent kinase 7                                      |
| cell division cycle 2-like 6 (CDK8-like)                       |
| cyclin-dependent kinase 8                                      |
| cyclin-dependent kinase 9                                      |

|                                                                                |
|--------------------------------------------------------------------------------|
| cell division cycle 2-like 5 (cholinesterase-related cell division controller) |
| Cdc2-related kinase, arginine/serine-rich                                      |
| cell division cycle 2-like 1 (PITSLRE proteins)                                |
| PCTAIRE protein kinase 1                                                       |
| PCTAIRE protein kinase 2                                                       |
| PCTAIRE protein kinase 3                                                       |
| cyclin-dependent kinase 14                                                     |
| cyclin-dependent kinase 15                                                     |
| cell cycle related kinase                                                      |
| cyclin-dependent kinase-like 1 (CDC2-related kinase)                           |
| cyclin-dependent kinase-like 2 (CDC2-related kinase)                           |
| cyclin-dependent kinase-like 3                                                 |
| cyclin-dependent kinase-like 4                                                 |
|                                                                                |
| CDC-like kinase 1                                                              |
| CDC-like kinase 2                                                              |
| CDC-like kinase 3                                                              |
| CDC-like kinase 4                                                              |
| dual-specificity tyrosine-(Y)-phosphorylation regulated kinase 1A              |
| dual-specificity tyrosine-(Y)-phosphorylation regulated kinase 1B              |
| similar to Dual-specificity tyrosine-(Y)-phosphorylation regulated kinase 2    |
| dual-specificity tyrosine-(Y)-phosphorylation regulated kinase 3               |
| hypothetical LOC531276                                                         |
| homeodomain interacting protein kinase 1                                       |
| homeodomain interacting protein kinase 2                                       |
| homeodomain interacting protein kinase 3                                       |
| homeodomain interacting protein kinase 4                                       |
| PRP4 pre-mRNA processing factor 4 homolog B (yeast)                            |
| glycogen synthase kinase 3 alpha                                               |
| glycogen synthase kinase 3 beta                                                |
| mitogen-activated protein kinase 3                                             |
| mitogen-activated protein kinase 1                                             |
| mitogen-activated protein kinase 6                                             |
| mitogen-activated protein kinase 4                                             |
| mitogen-activated protein kinase 7                                             |
| mitogen-activated protein kinase 15                                            |
| mitogen-activated protein kinase 8                                             |
| mitogen-activated protein kinase 9                                             |
| mitogen-activated protein kinase 10                                            |
| nemo-like kinase                                                               |
| mitogen-activated protein kinase 14                                            |
| mitogen-activated protein kinase 11                                            |
| mitogen-activated protein kinase 13                                            |
| mitogen-activated protein kinase 12                                            |
| intestinal cell (MAK-like) kinase                                              |
| male germ cell-associated kinase                                               |
| renal tumor antigen                                                            |
| SFRS protein kinase 3                                                          |
| SFRS protein kinase 1                                                          |
| SFRS protein kinase 2                                                          |

|                                                                               |
|-------------------------------------------------------------------------------|
| aurora kinase A                                                               |
| aurora kinase B                                                               |
| aurora kinase C                                                               |
|                                                                               |
| BUB1 budding uninhibited by benzimidazoles 1 homolog (yeast)                  |
| BUB1 budding uninhibited by benzimidazoles 1 homolog beta (yeast)             |
| TP53 regulating kinase                                                        |
| calcium/calmodulin-dependent protein kinase kinase 1, alpha                   |
| calcium/calmodulin-dependent protein kinase kinase 2, beta                    |
| cell division cycle 7 homolog ( <i>S. cerevisiae</i> )                        |
| casein kinase 2, alpha 1 polypeptide                                          |
| casein kinase 2, alpha prime polypeptide                                      |
| germ cell associated 2 (haspin)                                               |
| conserved helix-loop-helix ubiquitous kinase                                  |
| inhibitor of kappa light polypeptide gene enhancer in B-cells, kinase beta    |
| inhibitor of kappa light polypeptide gene enhancer in B-cells, kinase epsilon |
| TANK-binding kinase 1                                                         |
|                                                                               |
|                                                                               |
| v-mos Moloney murine sarcoma viral oncogene homolog                           |
| AP2 associated kinase 1                                                       |
|                                                                               |
| cyclin G associated kinase                                                    |
| serine/threonine kinase 16                                                    |
|                                                                               |
| NIMA (never in mitosis gene a)- related kinase 10                             |
| NIMA (never in mitosis gene a)- related kinase 11                             |
| NIMA (never in mitosis gene a)-related kinase 2                               |
| NIMA (never in mitosis gene a)-related kinase 3                               |
| NIMA (never in mitosis gene a)-related kinase 4                               |
| NIMA (never in mitosis gene a)-related kinase 5                               |
| NIMA (never in mitosis gene a)-related kinase 6                               |
| NIMA (never in mitosis gene a)-related kinase 7                               |
| NIMA (never in mitosis gene a)- related kinase 8                              |
| NIMA (never in mitosis gene a)- related kinase 9                              |
| similar to SH3-binding kinase                                                 |
| SH3-binding domain kinase family, member 2                                    |
| similar to protein kinase                                                     |
| PTEN induced putative kinase 1                                                |
|                                                                               |
|                                                                               |
| serine/threonine kinase 35                                                    |
| PDLIM1 interacting kinase 1 like                                              |
| similar to Gene model 1082, (NCBI)                                            |
| testis expressed 14                                                           |
| nuclear receptor binding protein 1                                            |
| nuclear receptor binding protein 2                                            |
| U2AF homology motif (UHM) kinase 1                                            |
| ribonuclease L (2',5'-oligoadenylate synthetase-dependent)                    |
| hypothetical LOC614899                                                        |

|                                                                                    |
|------------------------------------------------------------------------------------|
| hypothetical LOC514490                                                             |
| serine/threonine kinase 31                                                         |
| protein kinase domain containing, cytoplasmic homolog (mouse)                      |
| receptor interacting protein kinase 5                                              |
|                                                                                    |
| eukaryotic translation initiation factor 2-alpha kinase 3                          |
| eukaryotic translation initiation factor 2-alpha kinase 1                          |
| eukaryotic translation initiation factor 2-alpha kinase 2                          |
| polo-like kinase 1 (Drosophila)                                                    |
| polo-like kinase 2 (Drosophila)                                                    |
| polo-like kinase 3 (Drosophila)                                                    |
| polo-like kinase 4                                                                 |
| similar to Serine/threonine-protein kinase PLK5 (Polo-like kinase 5) (PLK-5)       |
| SCY1-like 1 ( <i>S. cerevisiae</i> )                                               |
| SCY1-like 2 ( <i>S. cerevisiae</i> )                                               |
| SCY1-like 3 ( <i>S. cerevisiae</i> )                                               |
| PX domain containing serine/threonine kinase                                       |
| TBC1 domain containing kinase                                                      |
| tousled-like kinase 1                                                              |
| tousled-like kinase 2                                                              |
| PDZ binding kinase                                                                 |
| TTK protein kinase                                                                 |
| serine/threonine kinase 36, fused homolog (Drosophila)                             |
| unc-51-like kinase 1 ( <i>C. elegans</i> )                                         |
| unc-51-like kinase 2 ( <i>C. elegans</i> )                                         |
| unc-51-like kinase 3 ( <i>C. elegans</i> )                                         |
| unc-51-like kinase 4 ( <i>C. elegans</i> )                                         |
| phosphoinositide-3-kinase, regulatory subunit 4                                    |
| protein kinase, membrane associated tyrosine/threonine 1                           |
| WEE1 homolog ( <i>S. pombe</i> )                                                   |
| WEE1 homolog 2 ( <i>S. pombe</i> )                                                 |
| WNK lysine deficient protein kinase 1                                              |
| WNK lysine deficient protein kinase 2                                              |
| WNK lysine deficient protein kinase 3                                              |
|                                                                                    |
| natriuretic peptide receptor A/guanylate cyclase A (atriuretic peptide receptor A) |
| natriuretic peptide receptor B/guanylate cyclase B (atriuretic peptide receptor B) |
| guanylate cyclase 2D, membrane (retina-specific)                                   |
| guanylate cyclase 2F, retinal                                                      |
| guanylate cyclase 2C (heat stable enterotoxin receptor)                            |
| mitogen-activated protein kinase kinase kinase 1                                   |
| mitogen-activated protein kinase kinase kinase 2                                   |
| mitogen-activated protein kinase kinase kinase 3                                   |
| mitogen-activated protein kinase kinase kinase 4                                   |
| mitogen-activated protein kinase kinase kinase 5                                   |
| mitogen-activated protein kinase kinase kinase 6                                   |
| mitogen-activated protein kinase kinase kinase 15                                  |
| yeast Sps1/Ste20-related kinase 4 ( <i>S. cerevisiae</i> )                         |
|                                                                                    |
| serine threonine kinase 39 (STE20/SPS1 homolog, yeast)                             |

|                                                                                    |
|------------------------------------------------------------------------------------|
| mitogen-activated protein kinase kinase kinase kinase 2                            |
| mitogen-activated protein kinase kinase kinase kinase 1                            |
| mitogen-activated protein kinase kinase kinase kinase 5                            |
| mitogen-activated protein kinase kinase kinase kinase 3                            |
|                                                                                    |
| TRAF2 and NCK interacting kinase                                                   |
| misshapen-like kinase 1 (zebrafish)                                                |
| Nik related kinase                                                                 |
| serine/threonine kinase 4                                                          |
| serine/threonine kinase 3 (STE20 homolog, yeast)                                   |
| myosin IIIA                                                                        |
| myosin IIIB                                                                        |
| p21/Cdc42/Rac1-activated kinase 1 (STE20 homolog, yeast)                           |
| similar to serine/threonine kinase                                                 |
| p21 (CDKN1A)-activated kinase 3                                                    |
| p21(CDKN1A)-activated kinase 4                                                     |
| p21(CDKN1A)-activated kinase 7                                                     |
| p21(CDKN1A)-activated kinase 6                                                     |
| serine/threonine kinase 10                                                         |
| STE20-like kinase (yeast)                                                          |
| protein kinase LYK5                                                                |
| STE20-related kinase adaptor beta                                                  |
| TAO kinase 1                                                                       |
| TAO kinase 2                                                                       |
| TAO kinase 3                                                                       |
| serine/threonine kinase 24 (STE20 homolog, yeast)-like                             |
| serine/threonine protein kinase MST4                                               |
| serine/threonine kinase 25 (STE20 homolog, yeast)                                  |
| mitogen-activated protein kinase kinase 1                                          |
| mitogen-activated protein kinase kinase 2                                          |
| mitogen-activated protein kinase kinase 3                                          |
| mitogen-activated protein kinase kinase 4                                          |
| mitogen-activated protein kinase kinase 5                                          |
| mitogen-activated protein kinase kinase 6                                          |
| mitogen-activated protein kinase kinase 7                                          |
| mitogen-activated protein kinase kinase kinase 8                                   |
| mitogen-activated protein kinase kinase kinase 14                                  |
| c-abl oncogene 1, receptor tyrosine kinase                                         |
| v-abl Abelson murine leukemia viral oncogene homolog 2 (arg, Abelson-related gene) |
| activated p21cdc42Hs kinase                                                        |
| tyrosine kinase, non-receptor, 1                                                   |
| anaplastic lymphoma receptor tyrosine kinase                                       |
| AXL receptor tyrosine kinase                                                       |
| c-mer proto-oncogene tyrosine kinase                                               |
| TYRO3 protein tyrosine kinase                                                      |
| PTK7 protein tyrosine kinase 7                                                     |
| c-src tyrosine kinase                                                              |
| megakaryocyte-associated tyrosine kinase                                           |
| discoidin domain receptor tyrosine kinase 1                                        |
| discoidin domain receptor tyrosine kinase 2                                        |

|                                                                                                                      |
|----------------------------------------------------------------------------------------------------------------------|
| epidermal growth factor receptor (erythroblastic leukemia viral (v-erb-b) oncogene homolog, avian)                   |
|                                                                                                                      |
| v-erb-b2 erythroblastic leukemia viral oncogene homolog 3 (avian)                                                    |
| v-erb-a erythroblastic leukemia viral oncogene homolog 4                                                             |
| EPH receptor A1                                                                                                      |
| EPH receptor A10                                                                                                     |
| EPH receptor A2                                                                                                      |
| EPH receptor A3                                                                                                      |
| EPH receptor A4                                                                                                      |
| EPH receptor A5                                                                                                      |
| EPH receptor A6                                                                                                      |
| EPH receptor A7                                                                                                      |
| EPH receptor A8                                                                                                      |
| EPH receptor B1                                                                                                      |
| similar to protein tyrosine kinase                                                                                   |
| EPH receptor B2                                                                                                      |
| EPH receptor B3                                                                                                      |
| EPH receptor B4                                                                                                      |
| EPH receptor B6                                                                                                      |
| PTK2 protein tyrosine kinase 2                                                                                       |
| PTK2B protein tyrosine kinase 2 beta                                                                                 |
| fer (fps/fes related) tyrosine kinase                                                                                |
|                                                                                                                      |
| feline sarcoma oncogene                                                                                              |
| fibroblast growth factor receptor 1 (fms-related tyrosine kinase 2, Pfeiffer syndrome)                               |
| acteria-expressed kinase, keratinocyte growth factor receptor, craniofacial dysostosis 1, Crouzon syndrome, Pfeiffer |
| fibroblast growth factor receptor 3 (achondroplasia, thanatophoric dwarfism)                                         |
| fibroblast growth factor receptor 4                                                                                  |
| insulin-like growth factor 1 receptor                                                                                |
| insulin receptor                                                                                                     |
| insulin receptor-related receptor                                                                                    |
| Janus kinase 1                                                                                                       |
| Janus kinase 2 (a protein tyrosine kinase)                                                                           |
| similar to Janus kinase 3                                                                                            |
| tyrosine kinase 2                                                                                                    |
| apoptosis-associated tyrosine kinase                                                                                 |
| lemur tyrosine kinase 2                                                                                              |
|                                                                                                                      |
| met proto-oncogene (hepatocyte growth factor receptor)                                                               |
| macrophage stimulating 1 receptor (c-met-related tyrosine kinase)                                                    |
| muscle, skeletal, receptor tyrosine kinase                                                                           |
| fms-related tyrosine kinase 3                                                                                        |
|                                                                                                                      |
| v-kit Hardy-Zuckerman 4 feline sarcoma viral oncogene homolog                                                        |
| platelet-derived growth factor receptor, alpha polypeptide                                                           |
| platelet-derived growth factor receptor, beta polypeptide                                                            |
| ret proto-oncogene                                                                                                   |
| receptor tyrosine kinase-like orphan receptor 1                                                                      |
| receptor tyrosine kinase-like orphan receptor 2                                                                      |
| RYK receptor-like tyrosine kinase                                                                                    |

|                                                                                                          |
|----------------------------------------------------------------------------------------------------------|
|                                                                                                          |
| B lymphoid tyrosine kinase                                                                               |
| PTK6 protein tyrosine kinase 6                                                                           |
| Gardner-Rasheed feline sarcoma viral (v-fgr) oncogene homolog                                            |
| fyn-related kinase                                                                                       |
| FYN oncogene related to SRC, FGR, YES                                                                    |
| hemopoietic cell kinase                                                                                  |
| lymphocyte-specific protein tyrosine kinase                                                              |
| v-yes-1 Yamaguchi sarcoma viral related oncogene homolog                                                 |
| v-src sarcoma (Schmidt-Ruppin A-2) viral oncogene homolog (avian)                                        |
| src-related kinase lacking C-terminal regulatory tyrosine and N-terminal myristylation sites             |
| v-yes-1 Yamaguchi sarcoma viral oncogene homolog 1                                                       |
| spleen tyrosine kinase                                                                                   |
| zeta-chain (TCR) associated protein kinase 70kDa                                                         |
| BMX non-receptor tyrosine kinase                                                                         |
| Bruton agammaglobulinemia tyrosine kinase                                                                |
| IL2-inducible T-cell kinase                                                                              |
| tec protein tyrosine kinase                                                                              |
| TXK tyrosine kinase                                                                                      |
| tyrosine kinase with immunoglobulin-like and EGF-like domains 1                                          |
| TEK tyrosine kinase, endothelial (venous malformations, multiple cutaneous and mucosal)                  |
| serine/threonine/tyrosine kinase 1                                                                       |
| neurotrophic tyrosine kinase, receptor, type 1                                                           |
|                                                                                                          |
| neurotrophic tyrosine kinase, receptor, type 3                                                           |
| fms-related tyrosine kinase 1 (vascular endothelial growth factor/vascular permeability factor receptor) |
| fms-related tyrosine kinase 4                                                                            |
| kinase insert domain receptor (a type III receptor tyrosine kinase)                                      |
| interleukin-1 receptor-associated kinase 1                                                               |
| interleukin-1 receptor-associated kinase 2                                                               |
| interleukin-1 receptor-associated kinase 3                                                               |
| interleukin-1 receptor-associated kinase 4                                                               |
| LIM domain kinase 1                                                                                      |
| LIM domain kinase 2                                                                                      |
| testis-specific kinase 1                                                                                 |
| testis-specific kinase 2                                                                                 |
| leucine-rich repeat kinase 1                                                                             |
| leucine-rich repeat kinase 2                                                                             |
| TNNI3 interacting kinase                                                                                 |
|                                                                                                          |
| mitogen-activated protein kinase kinase kinase 13                                                        |
| mitogen-activated protein kinase kinase kinase 9                                                         |
| mitogen-activated protein kinase kinase kinase 10                                                        |
| mitogen-activated protein kinase kinase kinase 11                                                        |
| similar to mixed lineage kinase 4 (KIAA1804)                                                             |
| sterile alpha motif and leucine zipper containing kinase AZK                                             |
| mitogen-activated protein kinase kinase kinase 7                                                         |
| v-raf murine sarcoma 3611 viral oncogene homolog                                                         |
| v-raf murine sarcoma viral oncogene homolog B1                                                           |
| kinase suppressor of ras 1                                                                               |



|                                                                                             |
|---------------------------------------------------------------------------------------------|
| kinase suppressor of ras 2                                                                  |
| v-raf-1 murine leukemia viral oncogene homolog 1                                            |
| receptor-interacting serine-threonine kinase 4                                              |
| receptor (TNFRSF)-interacting serine-threonine kinase 1                                     |
| receptor-interacting serine-threonine kinase 2                                              |
| receptor-interacting serine-threonine kinase 3                                              |
|                                                                                             |
| activin A receptor type II-like 1                                                           |
| activin A receptor, type I                                                                  |
| activin A receptor, type IB                                                                 |
| activin A receptor, type IC                                                                 |
| bone morphogenetic protein receptor, type IA                                                |
| bone morphogenetic protein receptor, type IB                                                |
| transforming growth factor, beta receptor I (activin A receptor type II-like kinase, 53kDa) |
| activin A receptor, type IIA                                                                |
| activin A receptor, type IIB                                                                |
| bone morphogenetic protein receptor, type II (serine/threonine kinase)                      |
|                                                                                             |
| transforming growth factor, beta receptor II (70/80kDa)                                     |
| integrin-linked kinase                                                                      |
| mixed lineage kinase domain-like                                                            |
|                                                                                             |

| Chr | cDNA lenght | ORF length | Protein size | kinase domain (KD)n size |
|-----|-------------|------------|--------------|--------------------------|
| 21  | 1691        | 1443       | 480          | 259                      |
| 18  | 3460        | 1446       | 481          | 258                      |
| 16  | 1776        | 1440       | 479          | 258                      |
| 18  | 2434        | 1857       | 618          | 269                      |
| 29  | 5018        | 4632       | 1543         | 266                      |
| 16  | 5265        | 5265       | 1754         | 267                      |
| 21  | 6560        | 5271       | 1756         | 267                      |
| 24  | 4793        | 4104       | 1367         | 263                      |
| 11  | 5053        | 4167       | 1388         | 263                      |
| 17  | 5837        | NA         | 1820         | 110                      |
| 29  | 2520        | 2070       | 689          | 263                      |
| 17  | 2791        | 2067       | 688          | 263                      |
| 6   | 1752        | 1752       | 583          | 263                      |
| 26  | 2539        | 1773       | 590          | 263                      |
| 7   | 2853        | 1725       | 574          | 259                      |
| 1   | 2227        | 1659       | 552          | 264                      |
| 12  | 2898        | 1686       | 561          | 266                      |
| 7   | 4719        | 4719       | 1572         | 274                      |
| 3   | 5414        | 5136       | 1711         | 274                      |
| 7   | 5651        | 4101       | 1366         | 274                      |
| 20  | 7677        | 7302       | 2433         | 274                      |
| 13  | 2736        | 2643       | 880          | 276                      |
| 3   | 795         | 795        | 264          | 161                      |
| 9   | 7537        | 3372       | 1123         | 306                      |
| 12  | 4733        | 3048       | 1015         | 305                      |
| 23  | 3545        | 1398       | 465          | 294                      |
| 5   | 4209        | 1395       | 464          | 294                      |
| 7   | 2522        | 1056       | 351          | 255                      |
| 3   | 1750        | 1056       | 351          | 255                      |
| X   | 1139        | 957        | 318          | 255                      |
| 25  | 1820        | 1605       | 534          | 265                      |
| 1   | 2813        | 1791       | 596          | 269                      |
| 16  | 2240        | 1785       | 594          | 267                      |
| 19  | 2324        | 2019       | 672          | 259                      |
| 25  | 2955        | 2022       | 673          | 259                      |
| 18  | 3032        | 2094       | 697          | 264                      |
| 22  | 3019        | 2031       | 676          | 255                      |
| 11  | 5491        | 2214       | 737          | 261                      |
| 10  | 2389        | 2049       | 682          | 260                      |
| 13  | 3181        | 2121       | 706          | 255                      |
| 26  | 2775        | 2016       | 671          | 260                      |
| 6   | 2289        | 2289       | 762          | 259                      |
| 7   | 3059        | 2835       | 944          | 260                      |
| 3   | 3226        | 2946       | 981          | 260                      |
| 11  | 3386        | 2661       | 886          | 260                      |
| 10  | 4103        | 2346       | 781          | 270                      |
| 29  | 3061        | 2316       | 771          | 269                      |
| 19  | 1585        | 1584       | 527          | 262                      |
| 29  | 1791        | 1560       | 519          | 262                      |

|    |       |       |      |     |
|----|-------|-------|------|-----|
| 9  | 3605  | 2202  | 733  | 260 |
| X  | 2927  | 2223  | 740  | 260 |
| 2  | 3157  | 2208  | 735  | 260 |
| X  | 2635  | 2235  | 744  | 258 |
| 16 | 4415  | 3186  | 1061 | 232 |
| 10 | 3608  | 1326  | 441  | 283 |
| 19 | 1628  | 819   | 272  | 171 |
| 9  | 2382  | 1296  | 431  | 258 |
| 13 | 1755  | 1104  | 367  | 258 |
| 14 | 3363  | 1473  | 490  | 258 |
| 7  | 1852  | 1101  | 366  | 259 |
| 6  | 1479  | 1479  | 492  | 261 |
| 26 | 3409  | 2889  | 962  | 261 |
| 5  | 1242  | 1053  | 350  | NA  |
| 22 | 1614  | 1050  | 349  | NA  |
| 16 | 2903  | 1947  | 648  | NA  |
| 18 | 2149  | 1578  | 525  | NA  |
| 10 | 2274  | 1572  | 523  | NA  |
| 14 | 1927  | 1743  | 580  | NA  |
| 4  | 2160  | 1878  | 625  | NA  |
| 10 | 7214  | 5601  | 1866 | NA  |
| 8  | 6756  | 6480  | 2159 | NA  |
| 25 | 5774  | 2172  | 723  | NA  |
| 21 | 5352  | NA    | 1783 | NA  |
| 24 | 6916  | 6360  | 2119 | NA  |
| 6  | 4289  | 3774  | 1257 | NA  |
| 17 | 3127  | 2967  | 988  | NA  |
| 23 | 2412  | 2412  | 803  | NA  |
| 11 | 3093  | 2169  | 722  | NA  |
| 7  | 5608  | 4107  | 1368 | NA  |
| 3  | 2936  | 2808  | 935  | NA  |
| 4  | 1829  | 1632  | 543  | NA  |
| 23 | 2416  | 510   | 169  | NA  |
| 17 | 1906  | 591   | 196  | NA  |
| 25 | 1872  | 1239  | 412  | NA  |
| 2  | 3859  | 1317  | 438  | NA  |
| 19 | 2277  | 1032  | 343  | NA  |
| X  | 2082  | 1248  | 415  | NA  |
| 4  | 3805  | 1224  | 407  | NA  |
| 15 | 9406  | 9165  | 3054 | NA  |
| 1  | 8268  | 7935  | 2644 | NA  |
| 14 | 12953 | 12375 | 4124 | NA  |
| 16 | 8303  | 7656  | 2551 | NA  |
| 25 | 15784 | 10977 | 3658 | NA  |
| 25 | 12190 | 11496 | 3831 | NA  |
| 23 | 1952  | NA    | 544  | NA  |
| 7  | 1871  | 1656  | 551  | NA  |
| 24 | 4335  | 1560  | 519  | NA  |
| X  | 7765  | 6090  | 2029 | NA  |
| 3  | 3622  | 3330  | 1109 | NA  |

|    |      |      |      |     |
|----|------|------|------|-----|
| 18 | 2934 | 2202 | 733  | NA  |
| 4  | 3365 | 2808 | 935  | NA  |
| 22 | 1456 | 1113 | 370  | 257 |
| X  | 1410 | 1029 | 342  | 256 |
| 13 | 1510 | 1140 | 379  | 272 |
| 16 | 2357 | 1425 | 474  | 255 |
| 7  | 3032 | 1437 | 478  | 259 |
| 4  | 1912 | 1629 | 542  | 259 |
| 6  | 1537 | 1500 | 499  | 259 |
| 28 | 1780 | 1488 | 495  | 259 |
| 10 | 1532 | 1392 | 463  | 255 |
| 20 | 1698 | 1698 | 565  | 268 |
| 3  | 2153 | 1659 | 552  | 253 |
| 18 | 3018 | 2481 | 826  | 252 |
| 29 | 2175 | 2175 | 724  | 265 |
| 29 | 2276 | 1431 | 476  | 257 |
| 1  | 2028 | 2028 | 675  | 261 |
| 7  | 1623 | 1326 | 441  | 264 |
| 16 | 2681 | 2388 | 795  | 252 |
| 29 | 2274 | 2274 | 757  | 252 |
| 21 | 2995 | 2379 | 792  | 252 |
| 18 | 1947 | 1329 | 442  | 252 |
| 14 | 1518 | 1518 | 505  | 250 |
| 8  | 2445 | 1953 | 650  | 253 |
| 20 | 2122 | 1311 | 436  | 252 |
| 5  | 2227 | 1989 | 662  | 252 |
| 16 | 1476 | 1476 | 491  | 251 |
| 3  | 4495 | 4128 | 1375 | 253 |
| 15 | 3639 | 2721 | 906  | 252 |
| 15 | 6891 | 3945 | 1314 | 252 |
| 1  | 1797 | NA   | 599  | 255 |
| 22 | 5000 | 2085 | 694  | 254 |
| 3  | 1749 | 1311 | 436  | 195 |
| 15 | 2228 | 1461 | 486  | 266 |
| 22 | 2932 | 1515 | 504  | 263 |
| X  | 3302 | 2727 | 908  | 265 |
| 8  | 2519 | 4293 | 1430 | 263 |
| 10 | 1579 | 1452 | 483  | 263 |
| 7  | 3120 | 1365 | 454  | 263 |
| 4  | 1760 | 1245 | 414  | 261 |
| 2  | 1577 | 1119 | 372  | 260 |
| 12 | 1296 | NA   | 431  | 258 |
| 17 | 2304 | 2304 | 767  | 258 |
| 22 | 2607 | 2607 | 868  | 258 |
| 16 | 1747 | 1212 | 403  | 262 |
| 22 | 2654 | 1155 | 384  | 261 |
| 17 | 1751 | 1419 | 472  | 285 |
| 3  | 2553 | 1263 | 420  | 286 |
| 7  | 1504 | 1395 | 464  | 286 |
| 18 | 2457 | 2361 | 786  | 256 |

|    |       |      |      |     |
|----|-------|------|------|-----|
| 23 | 1206  | 1206 | 401  | 256 |
| 13 | 2249  | 1872 | 623  | 256 |
| 1  | 3983  | 3531 | 1176 | 256 |
| 2  | 5     | NA   | NA   | 255 |
| 25 | 2042  | 1164 | 387  | 269 |
| 25 | 1717  | 1221 | 406  | 268 |
| 23 | 2753  | 942  | 313  | 253 |
| X  | 2155  | 1233 | 410  | 255 |
| 5  | 1888  | 981  | 326  | 254 |
| 21 | 3323  | 2553 | 850  | 257 |
| 18 | 2894  | 2652 | 883  | 257 |
| 11 | 5173  | 2673 | 890  | 257 |
| 18 | 3390  | 1275 | 424  | 258 |
| 17 | 1992  | 1605 | 534  | 267 |
| 14 | 3504  | 1119 | 372  | 245 |
| 11 | 3047  | 1032 | 343  | 245 |
| 13 | 1988  | 1074 | 357  | 245 |
| 7  | 5737  | 5643 | 1880 | 254 |
| 2  | 10000 | 9846 | 3281 | 254 |
| 1  | 8961  | 8961 | 2986 | 255 |
| 20 | 4672  | 4212 | 1403 | 255 |
| 7  | 1350  | 822  | 273  | 256 |
| 17 | 1459  | 1104 | 367  | 261 |
| 17 | 1548  | 1077 | 358  | 261 |
| 2  | 1240  | 810  | 269  | 256 |
| 10 | 1220  | 1017 | 338  | 281 |
| 14 | 1639  | 1188 | 395  | 277 |
| 7  | 1429  | 978  | 325  | 261 |
| X  | 1903  | 1011 | 336  | 261 |
| 19 | 3533  | 1230 | 409  | 261 |
| 5  | 2133  | 1401 | 466  | 261 |
| 10 | 1924  | 1314 | 437  | 264 |
| 7  | 2383  | 1245 | 414  | 263 |
| 7  | 4603  | 1341 | 446  | 262 |
| 23 | 3834  | 3834 | 1277 | 254 |
| 10 | 5466  | 3732 | 1243 | 256 |
| 5  | 1525  | 1191 | 396  | 267 |
| 11 | 2106  | 1296 | 431  | 264 |
| 18 | 1956  | 1356 | 451  | 240 |
| 28 | 1258  | 894  | 297  | 284 |
| 5  | 1369  | 897  | 298  | 283 |
| 19 | 1576  | 918  | 305  | 283 |
| 18 | 1644  | 1086 | 361  | 285 |
| 5  | 1369  | 912  | 303  | 290 |
| 4  | 1619  | 981  | 326  | 288 |
| 4  | 1100  | 879  | 292  | 283 |
| 20 | 1376  | 1041 | 346  | 284 |
| 9  | 2895  | 1503 | 500  | 316 |
| 12 | 2484  | 1332 | 443  | 293 |
| 11 | 1747  | 1119 | 372  | 297 |

|    |      |      |      |     |
|----|------|------|------|-----|
| 4  | 7268 | 4539 | 1512 | 294 |
| 19 | 5981 | 4473 | 1490 | 294 |
| 16 | 2916 | 2316 | 771  | 286 |
| X  | 3105 | 1491 | 496  | 282 |
| 5  | 3625 | 1572 | 523  | 282 |
| 16 | 2847 | 1416 | 471  | 282 |
| 4  | 1605 | 1486 | 494  | 285 |
| 2  | 1305 | 1305 | 434  | 285 |
| 8  | 2119 | 1041 | 346  | 285 |
| 10 | 1889 | 1059 | 352  | 284 |
| 6  | 2549 | 1710 | 569  | 284 |
| 7  | 1776 | 1776 | 591  | 283 |
| 11 | 1216 | 948  | 315  | 283 |
| X  | 2949 | 2949 | 982  | 285 |
| 2  | 1831 | 1458 | 485  | 317 |
| 3  | 2131 | 1500 | 499  | 317 |
| 21 | 1901 | 1473 | 490  | 317 |
| 7  | 2081 | 1446 | 481  | 316 |
| 1  | 5114 | 2292 | 763  | 321 |
| 18 | 2567 | 2067 | 688  | 321 |
| 5  | 1800 | 1800 | 599  | 314 |
| 16 | 2180 | 1764 | 587  | 314 |
| 5  | 1914 | 1914 | 637  | 297 |
| 3  | 3645 | 3645 | 1214 | 331 |
| 4  | 3606 | 3573 | 1190 | 329 |
| 15 | 4874 | 3651 | 1216 | 329 |
| 18 | 3360 | 1851 | 616  | 337 |
| 23 | 4163 | 3027 | 1008 | 313 |
| 18 | 2506 | 1488 | 495  | 285 |
| 1  | 1861 | 1299 | 432  | 298 |
| 25 | 2135 | 1089 | 362  | 289 |
| 17 | 1272 | 1083 | 360  | 289 |
| 10 | 3901 | 2169 | 722  | 297 |
| 24 | 1755 | 1080 | 359  | 265 |
| 19 | 3054 | 2346 | 781  | 293 |
| 14 | 1959 | 1611 | 536  | 292 |
| 28 | 3047 | 1284 | 427  | 296 |
| 7  | 4602 | 1275 | 424  | 296 |
| 6  | 2913 | 1281 | 426  | 296 |
| 19 | 4073 | 1584 | 527  | 290 |
| 23 | 4284 | 1083 | 360  | 285 |
| 5  | 2290 | 1056 | 351  | 272 |
| 23 | 1402 | 1101 | 366  | 284 |
| 5  | 1727 | 1104 | 367  | 285 |
| 23 | 4005 | 1887 | 628  | 281 |
| 23 | 2257 | 1872 | 623  | 281 |
| 21 | 1731 | 1302 | 433  | 282 |
| X  | 2100 | 1698 | 565  | 486 |
| 23 | 4291 | 1968 | 655  | 574 |
| 4  | 5185 | 2133 | 710  | 606 |

|    |      |      |      |     |
|----|------|------|------|-----|
| 13 | 2000 | 1209 | 402  | 251 |
| 19 | 2164 | 1035 | 344  | 251 |
| 18 | 1071 | 915  | 304  | 251 |
| 20 | 1053 | 1053 | 350  | 233 |
| 11 | 3750 | 3237 | 1078 | 269 |
| 10 | 4018 | 3189 | 1062 | 265 |
| 13 | 1406 | 762  | 253  | 220 |
| 19 | 2043 | 1518 | 505  | 285 |
| 17 | 1957 | 1740 | 579  | 282 |
| 3  | 3466 | 1731 | 576  | 514 |
| 13 | 2328 | 1176 | 391  | 285 |
| 18 | 1529 | 1053 | 350  | 286 |
| 19 | 2999 | 2346 | 781  | 314 |
| 26 | 3442 | 2223 | 740  | 274 |
| 27 | 3490 | 2271 | 756  | 275 |
| 16 | 3106 | 2157 | 718  | 318 |
| 5  | 3348 | 2190 | 729  | 296 |
| 19 | 2955 | 2931 | 976  | 262 |
| 25 | 2937 | 2778 | 925  | 262 |
| 14 | 1130 | 1023 | 340  | 272 |
| 11 | 3195 | 2877 | 958  | 275 |
| 6  | 3437 | 3375 | 1124 | 291 |
| 6  | 4394 | 3807 | 1268 | 274 |
| 2  | 1482 | 918  | 305  | 271 |
| 8  | 1272 | NA   | 424  | 255 |
| 22 | 2505 | 2505 | 834  | 246 |
| 1  | 1731 | 1731 | 576  | 259 |
| 16 | 2142 | 1338 | 445  | 264 |
| 12 | 2089 | 1488 | 495  | 254 |
| 22 | 3480 | 2364 | 787  | 256 |
| 12 | 1644 | 1644 | 547  | 256 |
| 11 | 2550 | 942  | 313  | 261 |
| 16 | 1680 | 912  | 303  | 262 |
| 19 | 2147 | 2097 | 698  | 255 |
| 10 | 5508 | 2934 | 977  | 257 |
| 25 | 1077 | 1077 | 358  | 265 |
| 18 | 1503 | 1503 | 500  | 264 |
| 18 | 1095 | 1095 | 364  | 262 |
| 2  | 2971 | 1767 | 588  | 352 |
| 27 | 4155 | NA   | 1384 | 313 |
| 21 | 4647 | 4647 | 1548 | 337 |
| 13 | 1540 | 1209 | 402  | 329 |
| 2  | 1394 | 1290 | 429  | 333 |
| 18 | 2025 | 2025 | 674  | 111 |
| 19 | 4808 | 4482 | 1493 | 305 |
| 11 | 2165 | 1608 | 535  | 264 |
| 14 | 3298 | 1500 | 499  | 270 |
| 3  | 2115 | 1260 | 419  | 282 |
| 16 | 2779 | 2172 | 723  | 110 |
| 11 | 1965 | 1965 | 654  | 266 |

|    |      |      |      |     |
|----|------|------|------|-----|
| 27 | 3345 | 1053 | 350  | 251 |
| 4  | 2922 | 2922 | 973  | 237 |
| 11 | 2142 | 1482 | 493  | 228 |
| 16 | 5138 | 2787 | 928  | 264 |
| 10 | 5179 | 4956 | 1651 | 412 |
| 11 | 4607 | 3348 | 1115 | 484 |
| 25 | 2860 | 1899 | 632  | 418 |
| 11 | 2267 | 1602 | 533  | 256 |
| 25 | 2187 | 1809 | 602  | 253 |
| 20 | 2903 | 2058 | 685  | 253 |
| 3  | 2371 | 1944 | 647  | 253 |
| 17 | 3583 | 2682 | 893  | 254 |
| 7  | 1941 | 1941 | 646  | 255 |
| 29 | 2644 | 2424 | 807  | 231 |
| 5  | 5581 | 2790 | 929  | 296 |
| 16 | 2907 | 2259 | 752  | 221 |
| 22 | 2927 | 1740 | 579  | 248 |
| 6  | 2931 | 2931 | 976  | 256 |
| 2  | 3897 | 2289 | 762  | 279 |
| 19 | 3037 | 2313 | 770  | 280 |
| 8  | 1972 | 975  | 324  | 288 |
| 9  | 2971 | 2571 | 856  | 266 |
| 2  | 4460 | 3948 | 1315 | 251 |
| 17 | 3805 | 3168 | 1055 | 263 |
| 19 | 3522 | 3114 | 1037 | 264 |
| 21 | 2562 | 1419 | 472  | 257 |
| 22 | 3788 | 3678 | 1225 | 277 |
| 1  | 4994 | 4077 | 1358 | 284 |
| 25 | 2579 | 1494 | 497  | 250 |
| 15 | 2561 | 1269 | 422  | 271 |
| 4  | 1701 | 1701 | 566  | 275 |
| 5  | 8732 | NA   | 2118 | 226 |
| 8  | 6855 | 6681 | 2226 | 259 |
| Un | 2460 | NA   | 700  | 259 |
| 19 | 4010 | 3660 | 1219 | 259 |
| 3  | 3818 | 3195 | 1064 | 269 |
| 8  | 3276 | 3144 | 1047 | 270 |
| 19 | 4594 | 3333 | 1110 | 274 |
| X  | 5956 | 3312 | 1103 | 280 |
| 5  | 3772 | 3219 | 1072 | 273 |
| 20 | 4881 | 4530 | 1509 | 268 |
| 2  | 3025 | 1863 | 620  | 261 |
| 19 | 2187 | 1851 | 616  | 261 |
| 9  | 5630 | 4662 | 1553 | 259 |
| 9  | 5283 | 4101 | 1366 | 261 |
| 2  | 4109 | 3888 | 1295 | 254 |
| X  | 5876 | 4473 | 1490 | 256 |
| 2  | 3984 | 3984 | 1327 | 264 |
| 22 | 1833 | 1584 | 527  | 275 |
| 2  | 3229 | 1614 | 537  | 275 |



|    |      |      |      |     |
|----|------|------|------|-----|
| 29 | 2885 | 2466 | 821  | 258 |
| 18 | 2653 | 2463 | 820  | 258 |
| 10 | 4458 | 2541 | 846  | 258 |
| 11 | 4184 | 2685 | 894  | 258 |
| 11 | 4312 | 3999 | 1332 | 267 |
| 1  | 6668 | 3918 | 1305 | 248 |
| 19 | 4916 | 3933 | 1310 | 265 |
| X  | 5847 | 4761 | 1586 | 289 |
| 13 | 1911 | 1464 | 487  | 252 |
| 14 | 3034 | 1830 | 609  | 252 |
| 13 | 4908 | 4908 | 1635 | 267 |
| 2  | 2985 | 2985 | 994  | 267 |
| 29 | 3079 | 1635 | 544  | 252 |
| 9  | 4292 | 1038 | 345  | 252 |
| X  | 2336 | 1635 | 544  | 252 |
| 18 | 2616 | 1782 | 593  | 252 |
| 13 | 2511 | 2160 | 719  | 252 |
| 10 | 3868 | 2046 | 681  | 252 |
| 20 | 5256 | 2904 | 967  | 259 |
| 26 | 3176 | 2967 | 988  | 259 |
| 19 | 2294 | 1122 | 373  | 311 |
| 2  | 2001 | 1299 | 432  | 312 |
| 19 | 6255 | 3006 | 1001 | 254 |
| 25 | 4145 | 3150 | 1049 | 254 |
| 17 | 4101 | 2697 | 898  | 254 |
| 12 | 1744 | 1302 | 433  | 251 |
| X  | 1743 | 1365 | 454  | 251 |
| 3  | 1618 | 1284 | 427  | 251 |
| 10 | 2376 | 1182 | 393  | 294 |
| 7  | 1633 | 1203 | 400  | 298 |
| 19 | 2233 | 1044 | 347  | 262 |
| 19 | 3848 | 1239 | 412  | 266 |
| 10 | 1311 | 1311 | 436  | 253 |
| 19 | 1527 | 1005 | 334  | 262 |
| 7  | 3524 | 1407 | 468  | 261 |
| 13 | 2553 | 1407 | 468  | 253 |
| 19 | 4323 | 2862 | 953  | 267 |
| 11 | 3952 | 3456 | 1151 | 252 |
| 16 | 3539 | 3441 | 1146 | 252 |
| 1  | 4276 | 3216 | 1071 | 260 |
| 19 | 2611 | 1992 | 663  | 262 |
| 11 | 4866 | 4866 | 1621 | 270 |
| 18 | 4510 | 3012 | 1003 | 269 |
| 11 | 3474 | 2928 | 975  | 266 |
| 10 | 3746 | 2670 | 889  | 262 |
| 23 | 4281 | 3450 | 1149 | 266 |
| 21 | 2105 | 1353 | 450  | 246 |
| 7  | 1895 | 1458 | 485  | 244 |
| 23 | 3770 | 2748 | 915  | 295 |
| 3  | 3105 | 2568 | 855  | 287 |

|    |      |      |      |     |
|----|------|------|------|-----|
| 22 | 3633 | 3633 | 1210 | 258 |
| 19 | 3786 | 3786 | 1261 | 258 |
| 5  | 5448 | 4011 | 1336 | 257 |
| 2  | 3459 | 2190 | 1152 | 258 |
| 4  | 3207 | 2952 | 983  | 260 |
| 3  | 3027 | 3027 | 1008 | 255 |
| 2  | 3264 | 2928 | 975  | 257 |
| 1  | 3050 | 2955 | 984  | 257 |
| 2  | 3313 | 2973 | 990  | 257 |
| 6  | 1712 | NA   | 569  | 257 |
| 1  | 3182 | NA   | 1059 | 300 |
| 9  | 3321 | 2997 | 998  | 257 |
| 2  | 3156 | 3156 | 1051 | 258 |
| 1  | 3830 | 2889 | 962  | 260 |
| 3  | 504  | 504  | 167  | 85  |
| 2  | 3886 | 2898 | 965  | 260 |
| 1  | 3784 | 2994 | 997  | 260 |
| 25 | 3975 | 3021 | 1006 | 285 |
| 4  | 3175 | 2979 | 992  | 247 |
| 14 | 4541 | 3186 | 1061 | 264 |
| 8  | 4131 | 3030 | 1009 | 260 |
| 7  | 2636 | 2469 | 822  | 254 |
| X  | 516  | NA   | 172  | 138 |
| 21 | 2739 | 2469 | 822  | 256 |
| 27 | 3400 | 2463 | 820  | 277 |
| 26 | 3944 | 2469 | 822  | 277 |
| 6  | 2562 | 2409 | 802  | 277 |
| 7  | 2974 | 2403 | 800  | 277 |
| 21 | 4483 | 3615 | 1204 | 270 |
| 7  | 4770 | 3876 | 1291 | 268 |
| 3  | 3906 | 3906 | 1301 | 270 |
| 3  | 4331 | 3477 | 1158 | 278 |
| 8  | 4695 | 3399 | 1132 | 278 |
| 7  | 3775 | 3318 | 1105 | 283 |
| 7  | 5781 | 3558 | 1185 | 266 |
| 19 | 4706 | 4104 | 1367 | 274 |
| 25 | 4751 | NA   | 1422 | 275 |
| 18 | 4631 | NA   | 1431 | 320 |
| 4  | 4823 | 4155 | 1384 | 261 |
| 22 | 4489 | 4206 | 1401 | 253 |
| 8  | 3259 | 2610 | 869  | 281 |
| 12 | 3416 | 2925 | 974  | 334 |
| 7  | 3825 | 2895 | 964  | 330 |
| 6  | 5078 | 2967 | 988  | 336 |
| 6  | 3270 | 3270 | 1089 | 358 |
| 7  | 4452 | 3312 | 1103 | 359 |
| 28 | 3541 | 3342 | 1113 | 284 |
| 3  | 3299 | 2727 | 908  | 307 |
| 8  | 4006 | 2823 | 940  | 307 |
| 1  | 2593 | 1617 | 538  | 267 |

|    |      |      |      |     |
|----|------|------|------|-----|
| 8  | 660  | 660  | 219  | 218 |
| 8  | 2114 | 1506 | 501  | 251 |
| 13 | 1353 | 1353 | 450  | 253 |
| 2  | 2195 | 1584 | 527  | 250 |
| 9  | 3436 | 1545 | 514  | 258 |
| 9  | 2409 | 1614 | 537  | 250 |
| 13 | 2046 | 1512 | 503  | 251 |
| 2  | 2080 | 1530 | 509  | 251 |
| 14 | 2750 | 1539 | 512  | 252 |
| 13 | 1697 | 1629 | 542  | 249 |
| 13 | 1485 | 1485 | 494  | 251 |
| 24 | 4997 | 1626 | 541  | 250 |
| 8  | 2532 | 1818 | 605  | 249 |
| 11 | 3947 | 1854 | 617  | 249 |
| X  | 1965 | 1965 | 654  | 252 |
| X  | 2577 | 1980 | 659  | 252 |
| 7  | 4393 | 1863 | 620  | 250 |
| 6  | 2538 | 1956 | 651  | 250 |
| 6  | 2312 | 1584 | 527  | 252 |
| 3  | 3631 | 3411 | 1136 | 269 |
| 8  | 4625 | 3378 | 1125 | 269 |
| 5  | 1592 | 1269 | 422  | 269 |
| 3  | 2603 | 2388 | 795  | 275 |
| 8  | 3538 | 2514 | 837  | 273 |
| 21 | 3380 | 2478 | 825  | 272 |
| 12 | 4080 | 4080 | 1359 | 328 |
| 7  | 4383 | 4068 | 1355 | 325 |
| 6  | 5998 | 4071 | 1356 | 327 |
| X  | 2215 | 2157 | 718  | 310 |
| 22 | 2823 | 1866 | 621  | 268 |
| 5  | 2177 | 1743 | 580  | 279 |
| 5  | 2590 | 1386 | 461  | 269 |
| 25 | 3086 | 1944 | 647  | 266 |
| 17 | 2274 | 1917 | 638  | 271 |
| 8  | 2192 | 1893 | 630  | 258 |
| 3  | 1569 | 1569 | 522  | 260 |
| 21 | 6561 | 6048 | 2015 | 283 |
| 5  | 7871 | 7608 | 2535 | 246 |
| 3  | 3020 | 2508 | 835  | 261 |
| 5  | 3332 | 2685 | 894  | 239 |
| 1  | 3425 | 2901 | 966  | 240 |
| 10 | 3312 | 3312 | 1103 | 260 |
| 18 | 1077 | 1077 | 358  | 193 |
| 29 | 3595 | 2595 | 864  | 260 |
| 28 | 3147 | 3147 | 1048 | 275 |
| 2  | 2778 | 2403 | 800  | 244 |
| 9  | 3388 | 1740 | 579  | 248 |
| X  | 2355 | 1821 | 606  | 258 |
| 4  | 2492 | 2298 | 765  | 260 |
| 19 | 2913 | 2334 | 777  | 264 |

|    |      |      |     |     |
|----|------|------|-----|-----|
| 17 | 1836 | 1836 | 611 | 262 |
| 22 | 3209 | 2007 | 668 | 260 |
| 1  | 3794 | 2358 | 785 | 264 |
| 23 | 2403 | 1998 | 665 | 269 |
| 14 | 1688 | 1623 | 540 | 267 |
| 10 | 1802 | 1512 | 503 | 261 |
| 15 | 1884 | NA   | 628 | 215 |
| 5  | 2494 | 1512 | 503 | 288 |
| 2  | 2808 | 1530 | 509 | 288 |
| 5  | 2578 | 1518 | 505 | 288 |
| 2  | 1662 | 1479 | 492 | 288 |
| 28 | 4059 | 1599 | 532 | 288 |
| 6  | 3498 | 1509 | 502 | 288 |
| 8  | 2060 | 1500 | 499 | 288 |
| 2  | 4428 | 1542 | 513 | 281 |
| 22 | 1833 | 1539 | 512 | 291 |
| 2  | 3823 | 2745 | 914 | 307 |
| 5  | 1716 | 1716 | 571 | 312 |
| 22 | 4280 | 1704 | 567 | 295 |
| 15 | 1701 | 1359 | 452 | 257 |
| 18 | 2323 | 1407 | 468 | 263 |
| 14 | 759  | 759  | 252 | 177 |

| <b>VAIK</b> | <b>HRD</b> | <b>DFG</b> | <b>Catalytic activity</b> |
|-------------|------------|------------|---------------------------|
| YAMK        | YRD        | DFG        | Active                    |
| YAMK        | YRD        | DFG        | Active                    |
| YAMK        | YRD        | DFG        | Active                    |
| YAMK        | HRD        | DFG        | Active                    |
| FAMK        | HRD        | DFG        | Active                    |
| FAMK        | HRD        | DFG        | Active                    |
| YAMK        | HRD        | DFG        | Active                    |
| YAMK        | HRD        | DFD        | Active                    |
| YAMK        | HRD        | DFD        | Active                    |
|             |            |            | partial                   |
| YAMK        | YRD        | DLG        | Active                    |
| YAMK        | YRD        | DLG        | Active                    |
| YACK        | YRD        | DLG        | Active                    |
| YACK        | YRD        | DLG        | Active                    |
| YACK        | YRD        | DLG        | Active                    |
| YACK        | YRD        | DLG        | Active                    |
| YACK        | YRD        | DLG        | Active                    |
| FAMK        | HRD        | DFG        | Active                    |
| FAMK        | HRD        | DFG        | Active                    |
| FAIK        | HRD        | DFG        | Active                    |
| FAMK        | HRD        | DFG        | Active                    |
| YAVK        | HRD        | DFG        | Active                    |
| ---         | HRD        | DFG        | Inactive                  |
| YATK        | HRD        | DFG        | Active                    |
| YAMK        | HRD        | DFG        | Active                    |
| YAMK        | HRD        | DFG        | Active                    |
| YAMK        | HRD        | DFG        | Active                    |
| YAMK        | YRD        | DFG        | Active                    |
| YAMK        | YRD        | DFG        | Active                    |
| FALK        | YRD        | DFG        | Active                    |
| YAIK        | HRD        | DFG        | Active                    |
| YAMK        | YRD        | DYG        | Active                    |
| YAMK        | YRD        | DYG        | Active                    |
| YAIK        | YRD        | DFG        | Active                    |
| YAVK        | YRD        | DFG        | Active                    |
| YAIK        | YRD        | DFG        | Active                    |
| FAIK        | YRD        | DFG        | Active                    |
| YAVK        | YRD        | DFG        | Active                    |
| YAVK        | YRD        | DFG        | Active                    |
| FAIK        | YRD        | DFG        | Active                    |
| FAMK        | YRD        | DFG        | Active                    |
| FAMK        | YRD        | DFG        | Active                    |
| FAIK        | YRD        | DFG        | Active                    |
| FAIK        | YRD        | DFG        | Active                    |
| YAIK        | YRD        | DFG        | Active                    |
| YAMK        | YRD        | DFG        | Active                    |
| YAMK        | YRD        | DFG        | Active                    |
| FAMK        | YRD        | DFG        | Active                    |
| YAMK        | YRD        | DFG        | Active                    |



|      |     |     |          |
|------|-----|-----|----------|
|      |     |     | Atypical |
|      |     |     | Atypical |
| VAIK | HRD | DFG | Active   |
| VALK | HRD | DFG | Active   |
| FAVK | HRD | DFG | Active   |
| FALK | HRD | DFG | Active   |
| YAAK | HRD | DFG | Active   |
| YAAK | HRD | DFG | Active   |
| YAAK | HRD | DFG | Active   |
| YAAK | HRD | DFG | Active   |
| YALK | HRD | DRG | Active   |
| VAVK | HRD | DFG | Active   |
| VAVK | HRD | DFG | Active   |
| VAIK | HRD | DFG | Active   |
| VAVK | HRD | DFG | Active   |
| VAVK | HRD | DFG | Active   |
| VAIK | HRD | DFG | Active   |
| RAVK | HKD | DLG | Active   |
| VAVK | HRD | DFG | Active   |
| VAVK | HRD | DFG | Active   |
| VAIK | HRD | DFG | Active   |
| VAIK | HRD | DFG | Active   |
| VAIK | HRD | DFG | Active   |
| VAIK | HRD | DFG | Active   |
| VAIK | HRD | DFG | Active   |
| VAIK | HRD | DFG | Active   |
| VAIK | HRD | DFG | Active   |
| VAIK | HRD | DFG | Active   |
| VAVK | HRD | DFG | Active   |
| YVIK | FYD | DGR | Active   |
| WAIK | HRD | DFG | Active   |
| HTCK | HRN | DFH | Inactive |
| FAVK | HRD | GFG | Inactive |
| YAAK | HFD | DFG | Active   |
| YAAK | HFD | DFG | Active   |
| YAAK | HFD | DFG | Active   |
| FAAK | HLD | DFG | Active   |
| YAAK | HLD | DFG | Active   |
| YALK | HRD | DFG | Active   |
| FALK | HRD | DFG | Active   |
| YAMK | HRD | DFG | Active   |
| FALK | HRD | DFG | Active   |
| CALK | HRD | DFG | Active   |
| FALK | HRD | DFG | Active   |
| YAVK | HRD | DLG | Active   |
| YAVK | HRD | DLG | Active   |
| LAAK | HLD | DFG | Active   |

|      |     |            |          |
|------|-----|------------|----------|
| LAAK | HLD | DFG        | Active   |
| LAAK | HLD | DFG        | Active   |
| WAGK | HLD | DFG        | Active   |
| YMAK | HFD | <b>EFG</b> | Inactive |
| YAVK | HRD | DFG        | Active   |
| FAVK | HRD | DFG        | Active   |
| VAIK | HRD | DFG        | Active   |
| VAIK | HRD | DFG        | Active   |
| VAVK | HRD | DFG        | Active   |
| VAIK | HCD | DFG        | Active   |
| VAVK | HCD | DFG        | Active   |
| VAIK | HCD | DFG        | Active   |
| YAIK | HRD | DFG        | Active   |
| VAIK | HRD | DFG        | Active   |
| LRCK | LGD | <b>SLE</b> | Inactive |
| LVCK | LRD | <b>SLE</b> | Inactive |
| YICK | LRD | <b>NLE</b> | Inactive |
| CAAK | HLD | DFG        | Active   |
| FAAK | HLD | DFG        | Active   |
| VAVK | HLD | DLE        | Active   |
| VATK | HLD | DFG        | Active   |
| VAIK | HRD | DFG        | Active   |
| VAVK | HRD | DFG        | Active   |
| VAVK | HRD | DFG        | Active   |
| VAIK | HRD | DFG        | Active   |
| VAVK | GRD | DFG        | Active   |
| VAIK | HRD | DFG        | Active   |
| VAVK | HRD | DFG        | Active   |
| VAVK | HRD | DFG        | Active   |
| VAIK | HRD | DFG        | Active   |
| VAIK | HRD | DFG        | Active   |
| VAIK | YRD | DFG        | Active   |
| VAIK | YRD | DFG        | Active   |
| VAIK | YRD | DFG        | Active   |
| VALK | HRD | DFG        | Active   |
| VALK | HRD | DFG        | Active   |
| CVVK | HGD | DYG        | Active   |
| HVIK | HGD | DYG        | Active   |
| HQDK | HGN | <b>GYG</b> | Inactive |
| VAMK | HRD | DFG        | Active   |
| VALK | HRD | DFG        | Active   |
| VALK | HRD | DFG        | Active   |
| VALK | HRD | DFG        | Active   |
| VALK | HRD | DFG        | Active   |
| VALK | HRD | DFG        | Active   |
| VALK | HRD | DFG        | Active   |
| VAIK | HRD | DFG        | Active   |
| YALK | HRD | DMG        | Active   |
| YALK | HRD | DMG        | Active   |
| VALK | HRD | DFG        | Active   |



|      |     |     |        |
|------|-----|-----|--------|
| VALK | HRD | DFG | Active |
| VALK | HRD | DFG | Active |
| VALK | HRD | DFG | Active |
| VALK | HRD | DFG | Active |
| VALK | HRD | DFG | Active |
| VALK | HRD | DFG | Active |
| VALK | HRD | DFG | Active |
| VALK | HRD | DFG | Active |
| VALK | HRD | DFG | Active |
| VALK | HRD | DFG | Active |
| VAIK | HRD | DFG | Active |
| VAIK | HRD | DFG | Active |
| VAIK | HRD | DFG | Active |
| VAIK | HRD | DFG | Active |
| VELK | HRD | DFG | Active |
| VAVK | HTD | DFG | Active |
| VALK | HTD | DWD | Active |
| VALK | HTD | DFG | Active |
| VAVK | HTD | DFG | Active |
| VAIK | HCD | DFG | Active |
| VAIK | HCD | DFG | Active |
| VALK | HCD | DFG | Active |
| VALK | HCD | DFG | Active |
| VALK | HCD | DFG | Active |
| VAIK | HAD | DFG | Active |
| VAIK | HAD | DFG | Active |
| VAIK | HAD | DFG | Active |
| VAIK | HAD | DFG | Active |
| VAVK | HAD | DFG | Active |
| VAIK | HRD | DFG | Active |
| VAIK | HRD | DFG | Active |
| VAIK | HRD | DFG | Active |
| VAIK | HRD | DFG | Active |
| VAIK | HRD | DFG | Active |
| VAVK | HRD | DFG | Active |
| VAIK | HRD | DFG | Active |
| VAIK | HRD | DFG | Active |
| VAIK | HRD | DFG | Active |
| VAVK | HRD | DFG | Active |
| VAVK | HRD | DFG | Active |
| VAIK | HRD | DFG | Active |
| VAIK | HRD | DFG | Active |
| IAIK | HRD | DFG | Active |
| VAIK | HRD | DFG | Active |
| YACK | HRD | DFG | Active |
| VALK | HTD | DLG | Active |
| VAMK | HTD | DLG | Active |
| VAMK | HTD | DLG | Active |

|      |            |            |          |
|------|------------|------------|----------|
| LALK | HRD        | DFG        | Active   |
| VALK | HRD        | DFG        | Active   |
| VALK | HRD        | DFG        | Active   |
| VTLK | <b>RRD</b> | <b>LIS</b> | Inactive |
| FALK | HGD        | DLG        | Active   |
| TIK  | HGD        | DFS        | Active   |
| AVVK | HGD        | DFG        | Active   |
| YAMK | HRD        | DFG        | Active   |
| YAMK | HRD        | DFG        | Active   |
| IALK | HRD        | DFG        | Active   |
| VVVK | HRD        | DWG        | Active   |
| VVVK | HRD        | DWG        | Active   |
| VALK | HRD        | <b>TLN</b> | Inactive |
| IAIK | HRD        | DLG        | Active   |
| IAIK | HRD        | DLG        | Active   |
| VAVK | HRD        | DFG        | Active   |
| FAIK | HRD        | DFG        | Active   |
| VAVK | HRD        | DFG        | Active   |
| VAVK | HRD        | DFG        | Active   |
| VAVK | HLD        | DFG        | Active   |
| CALK | HRD        | DFG        | Active   |
| YALK | HRD        | DFG        | Active   |
| YALK | HRD        | DFG        | Active   |
| YALK | HRD        | DLG        | Active   |
| YVIK | HRD        | DFG        | Active   |
| LAMK | HRD        | DFG        | Active   |
| KVLK | HRD        | DFG        | Active   |
| LVVK | HRD        | DFG        | Active   |
| FAMK | HRD        | DFG        | Active   |
| YVIK | HRD        | DLG        | Active   |
| CVIK | HRD        | DFG        | Active   |
| VALK | HRD        | DLG        | Active   |
| VALK | HRD        | DLG        | Active   |
| VIK  | HRD        | DFG        | Active   |
| VVVK | HRD        | DYG        | Active   |
| MALK | HRD        | DFG        | Active   |
| LALK | YRD        | DFG        | Active   |
| VALK | HAD        | DLG        | Active   |
| LAIK | HRD        | DFG        | Active   |
| YAVK | HRD        | <b>NFL</b> | Inactive |
| YAVK | HCD        | <b>NFS</b> | Inactive |
| VAVK | HRD        | DFG        | Active   |
| VAVK | HRD        | DFG        | Active   |
| VKAK |            |            | partial  |
| VTVK | <b>HRS</b> | <b>NLE</b> | Inactive |
| VVWN | <b>HGN</b> | <b>VAP</b> | Inactive |
| VVWN | <b>HGN</b> | <b>VWH</b> | Inactive |
| GALK | HAD        | DFG        | Active   |
| VAVK | HQD        | DFD        | Active   |
| TKVK | <b>HRN</b> | DLS        | Inactive |

|             |            |            |          |
|-------------|------------|------------|----------|
| VALS        | <b>TRV</b> | <b>NFS</b> | Inactive |
| ILLK        | <b>HGS</b> | DFD        | Inactive |
| VALK        | LLD        | DLD        | Active   |
| CALK        | HRD        | DLG        | Active   |
| YAVK        | HRD        | DFG        | Active   |
| YAIK        | HRD        | DFG        | Active   |
| YAIK        | HRD        | DFG        | Active   |
| YVIK        | HRD        | DFG        | Active   |
| FAGK        | HRD        | DFG        | Active   |
| YAAK        | HRD        | DFG        | Active   |
| YAVK        | HRD        | DFG        | Active   |
| VAIK        | HRD        | DFG        | Active   |
| FALK        | HRD        | DLG        | Active   |
| VSIF        | <b>HNN</b> | GLD        | Inactive |
| VAVF        | HGN        | GFD        | Inactive |
| ASVF        | ARD        | <b>GME</b> | Inactive |
| LVLS        | <b>YGH</b> | DLE        | Inactive |
| LTPN        | <b>HRA</b> | <b>KFG</b> | Inactive |
| AAVK        | HYD        | DFG        | Active   |
| VAVK        | HYD        | DFG        | Active   |
| WAVK        | HGD        | DVG        | Active   |
| HAIK        | HSD        | DFG        | Active   |
| VALK        | HRD        | DFG        | Active   |
| VAVK        | HRD        | DFG        | Active   |
| VAIK        | HRD        | DFG        | Active   |
| VAIK        | HLD        | DFG        | Active   |
| <b>VAIL</b> | FCD        | <b>NFC</b> | Inactive |
| VVVK        | HGD        | DFA        | Active   |
| YAVK        | HLD        | DFG        | Active   |
| YAIK        | HMD        | DLG        | Active   |
| YAIK        | HLD        | DLG        | Active   |
| VAWC        | HRD        | DLG        | Active   |
| VAWC        | HRD        | DLG        | Active   |
| VAWC        | HRD        | DLG        | Active   |
| VAWC        | HRD        | DLG        | Active   |
| VAVK        | <b>HGN</b> | DYG        | Inactive |
| VAIK        | HGS        | DYG        | Inactive |
| VWLK        | <b>HGR</b> | DHG        | Inactive |
| VWLK        | <b>HGR</b> | DYG        | Inactive |
| VILK        | <b>HGR</b> | DFG        | Inactive |
| MAVK        | HRD        | DFG        | Active   |
| LAVK        | HRD        | DFG        | Active   |
| LASK        | HRD        | DFG        | Active   |
| MAMK        | HRD        | DFG        | Active   |
| IAIK        | HRD        | DFG        | Active   |
| IAIK        | HRD        | DFG        | Active   |
| IAIK        | HRD        | DFG        | Active   |
| IAVK        | HRD        | DFG        | Active   |
| VAIK        | HRD        | DFG        | Active   |
| VAIK        | HRD        | DFG        | Active   |

|      |            |            |          |
|------|------------|------------|----------|
| AAVK | HRD        | DFG        | Active   |
| VALK | HRD        | DFG        | Active   |
| AAVK | HRD        | DFG        | Active   |
| AAIK | HRD        | DFG        | Active   |
| AAIK | HRD        | DFG        | Active   |
| AAIK | HRD        | DFG        | Active   |
| AAIK | HRD        | DFG        | Active   |
| TAVK | HRD        | DFG        | Active   |
| VAIK | HRD        | DFG        | Active   |
| VAIK | HRD        | DFG        | Active   |
| AAVK | HRD        | DFG        | Active   |
| AAVK | HRD        | DFG        | Active   |
| VAIK | HRD        | DFG        | Active   |
| VAIK | HRD        | DFG        | Active   |
| VAIK | HRD        | DFG        | Active   |
| VAVK | HRD        | DFG        | Active   |
| VAVK | HRD        | DFG        | Active   |
| VAVK | HRD        | DFG        | Active   |
| AAAK | HRD        | DFG        | Active   |
| AAAK | HRD        | DFG        | Active   |
| VTVR | <b>HRS</b> | <b>GLR</b> | Inactive |
| VTIK | <b>HRS</b> | <b>GLS</b> | Inactive |
| VAIK | HRD        | DFG        | Active   |
| VAIK | HRD        | DFG        | Active   |
| VAIK | HRD        | DFG        | Active   |
| VAIK | HRD        | DFG        | Active   |
| VAIK | HRD        | DFG        | Active   |
| VAIK | HRD        | DFG        | Active   |
| MARK | HRD        | DFG        | Active   |
| MARK | HRD        | DFG        | Active   |
| MAVK | HRD        | DFG        | Active   |
| MAVK | HRD        | DFG        | Active   |
| LAVK | HRD        | DFG        | Active   |
| MAVK | HRD        | DFG        | Active   |
| IAVK | HRD        | DFG        | Active   |
| MACK | HHD        | DFG        | Active   |
| CAVK | HGD        | DFG        | Active   |
| VAVK | HRD        | DFG        | Active   |
| VAVK | HRD        | DFG        | Active   |
| VAVK | HRD        | DFG        | Active   |
| VAVK | HRD        | DFG        | Active   |
| VAVK | HRD        | DFG        | Active   |
| VAVK | HRD        | DFG        | Active   |
| VAVK | HRD        | DFG        | Active   |
| VAVK | HRD        | DFG        | Active   |
| VAVK | HRD        | DFG        | Active   |
| VAVK | HRD        | DFG        | Active   |
| VLVK | HKD        | <b>ALG</b> | Inactive |
| VAVK | HRD        | DFG        | Active   |
| VAVK | HRD        | DFG        | Active   |
| VAVK | HRD        | DFG        | Active   |
| VAVK | HRD        | DFG        | Active   |



|             |            |            |          |
|-------------|------------|------------|----------|
| AFVK        | HQD        | DNA        | Active   |
| VAIK        | HRD        | DFG        | Active   |
| VAIK        | HRD        | DFG        | Active   |
| VAVK        | HRD        | DFG        | Active   |
| VAVK        | HRD        | DFG        | Active   |
| VAIK        | HRD        | DFG        | Active   |
| VAVK        | HRD        | DFG        | Active   |
| VAVK        | HRD        | DFG        | Active   |
| VAVK        | HRD        | DFG        | Active   |
| VAIK        | HRD        | DFG        | Active   |
| VAVK        | HRD        | DFG        | Active   |
| VAIK        | HRD        | DFG        | Active   |
| VAVK        | HRD        | DFG        | Active   |
| VAIK        | HRD        | DFG        | Active   |
| VAVK        | HRD        | DFG        | Active   |
| VAIK        | HRD        | DFG        | Active   |
| VAIK        | HRD        | DFG        | Active   |
| VAIK        | HRD        | DFG        | Active   |
| VAIK        | HRD        | DFG        | Active   |
| AAIK        | HRD        | DFG        | Active   |
| AAIK        | HRD        | DFG        | Active   |
| VTLK        | HGD        | <b>GLG</b> | Inactive |
| VAVK        | HRD        | DFG        | Active   |
| VAVK        | HRD        | DFG        | Active   |
| VAVK        | HRD        | DFG        | Active   |
| VAVK        | HRD        | DFG        | Active   |
| VAVK        | HRD        | DFG        | Active   |
| VAVK        | HRD        | DFG        | Active   |
| VAVK        | HRD        | DFG        | Active   |
| YAVK        | HGD        | DFG        | Active   |
| FVFK        | HSN        | HSM        | Inactive |
| YAIK        | <b>CGS</b> | DFA        | Inactive |
| VAVK        | HRD        | DFG        | Active   |
| QAIK        | HRD        | DFG        | Active   |
| QAIK        | HRD        | DFG        | Active   |
| MVLK        | HRD        | DFG        | Active   |
| NVHK        | HRD        | DFG        | Active   |
| VAVK        | FCD        | DYG        | Active   |
| VAVK        | YRD        | DYG        | Active   |
| VAIK        | HRD        | DFG        | Active   |
| VAVK        | HRD        | DFG        | Active   |
| VAIK        | HRD        | DFG        | Active   |
| VAVK        | HRD        | DFG        | Active   |
| TVLK        | EID        | DFG        | Active   |
| VAVK        | HRD        | DFG        | Active   |
| VAVK        | HRD        | DFG        | Active   |
| VAVK        | HRD        | DFG        | Active   |
| VAIK        | HRD        | DFG        | Active   |
| VAVK        | HRD        | DFG        | Active   |
| VAVK        | HRD        | DFG        | Active   |
| <b>VAIR</b> | HKD        | DFG        | Inactive |

|             |            |            |          |
|-------------|------------|------------|----------|
| <b>VAIR</b> | HKD        | DFG        | Inactive |
| VAVK        | HRD        | DFG        | Active   |
| LAIK        | HLD        | DFG        | Active   |
| VILK        | HRD        | DLG        | Active   |
| VAVK        | HHD        | DFG        | Active   |
| VAVK        | HRD        | DFG        | Active   |
| EAAK        | HLD        | DFG        | Active   |
| VAVK        | HRD        | DLG        | Active   |
| VAVK        | HRD        | DLG        | Active   |
| VAVK        | HRD        | DLG        | Active   |
| VAVK        | HRD        | DLG        | Active   |
| VAVK        | HRD        | DLG        | Active   |
| VAVK        | HRD        | DLG        | Active   |
| VAVK        | HRD        | DLG        | Active   |
| VAVK        | HRD        | DFG        | Active   |
| VAVK        | HRD        | DFG        | Active   |
| VAVK        | HRD        | DFG        | Active   |
| VAIK        | HRD        | DLG        | Active   |
| VAVK        | HRD        | DFG        | Active   |
| IVVK        | <b>RHA</b> | ---        | Inactive |
| VAIK        | <b>HRN</b> | <b>ELS</b> | Inactive |
|             |            |            | partial  |

| Ensemble Pep       | Gene               | Transcript         | % identity in KD |
|--------------------|--------------------|--------------------|------------------|
|                    |                    |                    | 97,7             |
|                    |                    |                    | 100              |
|                    |                    |                    | 100              |
|                    |                    |                    | 96,7             |
| ENSBTAP00000015459 | ENSBTAG00000011639 | ENSBTAT00000015459 | 96,6             |
|                    |                    |                    | 99,3             |
|                    |                    |                    | 98,5             |
|                    |                    |                    | 100              |
|                    |                    |                    | 98,1             |
|                    |                    |                    | 91,7             |
|                    |                    |                    | 100              |
|                    |                    |                    | 96,6             |
|                    |                    |                    | 84,8             |
| ENSBTAP00000001500 | ENSBTAG00000001126 | ENSBTAT00000001500 | 98,9             |
|                    |                    |                    | 93,2             |
|                    |                    |                    | 91,3             |
|                    |                    |                    | 88,7             |
| ENSBTAP00000007991 |                    |                    | 97,8             |
|                    |                    |                    | 99,3             |
|                    |                    |                    | 97,8             |
|                    |                    |                    | 100              |
| ENSBTAP00000018430 | ENSBTAG00000013876 | ENSBTAT00000018430 | 92,4             |
|                    |                    |                    |                  |
|                    |                    |                    | 98,7             |
|                    |                    |                    | 96,4             |
|                    |                    |                    | 99,7             |
|                    |                    |                    | 99,3             |
|                    |                    |                    | 99,6             |
|                    |                    |                    | 100              |
|                    |                    |                    | 89,9             |
|                    |                    |                    | 98,8             |
|                    |                    |                    | 100              |
| ENSBTAP00000024029 | ENSBTAG00000018049 | ENSBTAT00000024029 | 99,6             |
| ENSBTAP00000023654 | ENSBTAG00000017788 | ENSBTAT00000023654 | 99,2             |
|                    |                    |                    | 99,6             |
|                    |                    |                    | 99,2             |
|                    |                    |                    | 88,6             |
|                    |                    |                    | 99,6             |
|                    |                    |                    | 98,5             |
|                    |                    |                    | 98,4             |
|                    |                    |                    | 100              |
|                    |                    |                    | 99,2             |
|                    |                    |                    | 99,2             |
| ENSBTAP00000045293 | ENSBTAG00000033983 | ENSBTAT00000048212 | 99,2             |
|                    |                    |                    | 94,2             |
|                    |                    |                    | 96,3             |
| ENSBTAP00000020910 |                    |                    | 97,4             |
|                    |                    |                    | 100              |
| ENSBTAP00000043326 | ENSBTAG00000014351 | ENSBTAT00000045990 | 98,1             |





|                    |                    |                    |      |
|--------------------|--------------------|--------------------|------|
|                    |                    |                    |      |
|                    |                    |                    |      |
|                    |                    |                    | 98,8 |
|                    |                    |                    | 96,9 |
| ENSBTAP00000029173 | ENSBTAG00000022777 | ENSBTAT00000029173 | 100  |
|                    |                    |                    | 98,8 |
|                    |                    |                    | 100  |
| ENSBTAP00000039020 | ENSBTAG00000034436 | ENSBTAT00000039220 | 99,6 |
|                    |                    |                    | 99,6 |
|                    |                    |                    | 100  |
|                    |                    |                    | 100  |
|                    |                    |                    | 94   |
|                    |                    |                    | 99,2 |
|                    |                    |                    | 100  |
| ENSBTAP00000019220 | ENSBTAG00000014456 | ENSBTAT00000019220 | 81,9 |
|                    |                    |                    | 96,9 |
|                    |                    |                    | 97,9 |
|                    |                    |                    | 86,1 |
|                    |                    |                    | 99,2 |
|                    |                    |                    | 100  |
|                    |                    |                    | 98,4 |
|                    |                    |                    | 99,6 |
|                    |                    |                    |      |
|                    |                    |                    | 95,3 |
|                    |                    |                    | 95,6 |
| ENSBTAP00000013805 |                    |                    | 100  |
|                    |                    |                    | 95,6 |
|                    |                    |                    | 90,9 |
|                    |                    |                    | 97,2 |
|                    |                    |                    | 99,6 |
|                    |                    |                    | 93,7 |
|                    |                    |                    | 98   |
|                    |                    |                    | 98,8 |
|                    |                    |                    | 90,2 |
|                    |                    |                    | 89   |
|                    |                    |                    | 100  |
|                    |                    |                    | 99,2 |
|                    |                    |                    | 97,6 |
|                    |                    |                    | 99,6 |
| ENSBTAP00000010716 | ENSBTAG00000008151 | ENSBTAT00000010716 | 93,9 |
|                    |                    |                    | 95,8 |
| ENSBTAP00000032957 |                    |                    | 100  |
|                    |                    |                    | 98,1 |
|                    |                    |                    | 94,2 |
| ENSBTAP00000018325 | ENSBTAG00000013790 | ENSBTAT00000018325 | 98,9 |
|                    |                    |                    | 98,1 |
|                    |                    |                    | 98,2 |
|                    |                    |                    | 96,5 |
|                    |                    |                    | 98,2 |
| ENSBTAP00000015445 | ENSBTAG00000011628 | ENSBTAT00000015445 | 96,9 |

|                     |                     |                     |      |
|---------------------|---------------------|---------------------|------|
| ENSBTAP00000008354  | ENSBTAG00000006359  | ENSBTAT00000008354  | 93,4 |
|                     |                     |                     | 97,7 |
| ENSBTAP00000007991  | ENSBTAG00000006080  | ENSBTAT00000007991  | 98,9 |
|                     |                     |                     | 96,5 |
|                     |                     |                     | 94,8 |
|                     |                     |                     | 98,1 |
|                     |                     |                     | 98,8 |
| ENSBTAP00000009545  | ENSBTAG00000007256  | ENSBTAT00000009545  | 94,5 |
|                     |                     |                     | 96,9 |
|                     |                     |                     | 100  |
|                     |                     |                     | 98,4 |
| ENSBTAP00000009942  | ENSBTAG00000007556  | ENSBTAT00000009942  | 99,6 |
|                     |                     |                     | 100  |
|                     |                     |                     | 95,5 |
|                     |                     |                     | 98,3 |
|                     |                     |                     | 99,6 |
| ENSBTAP00000008672  | ENSBTAG00000006601  | ENSBTAT00000008672  | 88,9 |
| ENSBTAP00000001378  | ENSBTAG00000001037  | ENSBTAT00000001378  | 86,8 |
|                     |                     |                     | 94,9 |
| ENSBTAP000000010653 | ENSBTAG00000008098  | ENSBTAT000000010653 | 100  |
|                     |                     |                     | 93,3 |
|                     |                     |                     | 98,4 |
|                     |                     |                     | 92,7 |
|                     |                     |                     | 93,9 |
|                     |                     |                     | 96,1 |
|                     |                     |                     | 97,9 |
| ENSBTAP000000015986 | ENSBTAG000000012047 | ENSBTAT000000015986 | 100  |
| ENSBTAP000000027857 | ENSBTAG000000020904 | ENSBTAT000000027857 |      |
|                     |                     |                     | 100  |
|                     |                     |                     | 100  |
| ENSBTAP000000024657 | ENSBTAG000000018524 | ENSBTAT000000024657 | 99,2 |
|                     |                     |                     | 99,2 |
|                     |                     |                     | 99,2 |
|                     |                     |                     | 99,6 |
|                     |                     |                     | 99,6 |
|                     |                     |                     | 95,5 |
|                     |                     |                     | 90,9 |
|                     |                     |                     | 82,5 |
|                     |                     |                     | 98,9 |
|                     |                     |                     | 98,6 |
|                     |                     |                     | 91,2 |
|                     |                     |                     | 96,1 |
|                     |                     |                     | 97,9 |
|                     |                     |                     | 99   |
|                     |                     |                     | 99,6 |
|                     |                     |                     | 97,9 |
|                     |                     |                     | 100  |
|                     |                     |                     | 94,3 |
|                     |                     |                     | 98,3 |

|                    |                    |                    |      |
|--------------------|--------------------|--------------------|------|
|                    |                    |                    | 99,7 |
|                    |                    |                    | 99,3 |
|                    |                    |                    | 97,9 |
|                    |                    |                    | 98,6 |
|                    |                    |                    | 97,9 |
|                    |                    |                    | 92,6 |
|                    |                    |                    | 100  |
|                    |                    |                    | 93   |
|                    |                    |                    | 92,6 |
|                    |                    |                    | 96,1 |
|                    |                    |                    | 96,1 |
|                    |                    |                    | 95,8 |
|                    |                    |                    | 95,8 |
|                    |                    |                    | 89,4 |
|                    |                    |                    | 97,2 |
|                    |                    |                    | 100  |
| ENSBTAP00000000016 | ENSBTAG00000000013 | ENSBTAT00000000016 | 99,7 |
|                    |                    |                    | 98,4 |
| ENSBTAP00000026195 | ENSBTAG00000032234 | ENSBTAT00000026195 | 99,7 |
| ENSBTAP00000026189 | ENSBTAG00000019652 | ENSBTAT00000026189 | 99,7 |
|                    |                    |                    | 100  |
|                    |                    |                    | 96,8 |
|                    |                    |                    | 93,9 |
|                    |                    |                    | 99,1 |
|                    |                    |                    | 99,7 |
|                    |                    |                    | 98,2 |
|                    |                    |                    | 98,3 |
|                    |                    |                    | 100  |
| ENSBTAP00000015200 | ENSBTAG00000011437 | ENSBTAT00000015200 | 98,2 |
|                    |                    |                    | 95,6 |
|                    |                    |                    | 98,6 |
|                    |                    |                    | 100  |
|                    |                    |                    | 99,7 |
|                    |                    |                    | 97   |
|                    |                    |                    | 99   |
|                    |                    |                    | 80   |
|                    |                    |                    | 99,7 |
| ENSBTAP00000000744 | ENSBTAG00000000570 | ENSBTAT00000000744 | 99,7 |
|                    |                    |                    | 100  |
|                    |                    |                    | 100  |
|                    |                    |                    | 100  |
|                    |                    |                    | 89,8 |
|                    |                    |                    | 95,4 |
|                    |                    |                    | 94,7 |
|                    |                    |                    | 98,2 |
|                    |                    |                    | 99,3 |
| ENSBTAP00000032957 | ENSBTAG00000012114 | ENSBTAT00000033031 | 91,8 |
|                    |                    |                    | 91,4 |
|                    |                    |                    | 95,3 |
|                    |                    |                    | 96,5 |

|                     |                    |                     |      |
|---------------------|--------------------|---------------------|------|
|                     |                    |                     | 97,2 |
|                     |                    |                     | 96   |
|                     |                    |                     | 86,9 |
|                     |                    |                     |      |
|                     |                    |                     | 87,4 |
| ENSBTAP00000023740  | ENSBTAG00000017860 | ENSBTAT00000023740  | 89,8 |
|                     |                    |                     | 91,8 |
|                     |                    |                     | 89,7 |
|                     |                    |                     | 98,9 |
|                     |                    |                     | 89,7 |
|                     |                    |                     | 100  |
|                     |                    |                     | 99,3 |
|                     |                    |                     | 85,7 |
|                     |                    |                     | 98,5 |
|                     |                    |                     | 97,8 |
| ENSBTAP00000009441  | ENSBTAG00000007173 | ENSBTAT00000009441  | 95,3 |
|                     |                    |                     | 100  |
|                     |                    |                     | 97,3 |
|                     |                    |                     | 90,5 |
|                     |                    |                     | 71,5 |
|                     |                    |                     | 99,6 |
| ENSBTAP00000017759  | ENSBTAG00000013347 | ENSBTAT00000017759  | 86,3 |
|                     |                    |                     | 93,5 |
| ENSBTAP00000020910  | ENSBTAG00000016551 | ENSBTAT00000020910  | 94,1 |
| ENSBTAP00000018430  |                    |                     | 96,1 |
|                     |                    |                     | 94,7 |
|                     |                    |                     | 91,5 |
|                     |                    |                     | 97,3 |
|                     |                    |                     | 90,6 |
| ENSBTAP00000002122  | ENSBTAG00000001618 | ENSBTAT00000002122  | 97,7 |
| ENSBTAP000000025471 |                    |                     | 91   |
|                     |                    |                     | 98,8 |
|                     |                    |                     | 98,4 |
|                     |                    |                     | 96,9 |
|                     |                    |                     | 99,6 |
| ENSBTAP00000029056  | ENSBTAG00000021798 | ENSBTAT00000029056  | 98,9 |
|                     |                    |                     | 80,7 |
|                     |                    |                     | 89,3 |
| ENSBTAP00000013238  | ENSBTAG00000010030 | ENSBTAT00000013238  | 85,8 |
|                     |                    |                     | 83,1 |
|                     |                    |                     | 78,3 |
|                     |                    |                     | 99,7 |
|                     |                    |                     | 99,4 |
| ENSBTAP00000018603  | ENSBTAG00000014000 | ENSBTAT00000018603  | 84,4 |
|                     |                    |                     | 100  |
|                     |                    |                     | 100  |
|                     |                    |                     | 92,4 |
| ENSBTAP000000035173 | ENSBTAG00000010979 | ENSBTAT000000035295 | 99,6 |
|                     |                    |                     | 69,3 |
|                     |                    |                     | 76   |

|                     |                     |                     |      |
|---------------------|---------------------|---------------------|------|
|                     |                     |                     | 80,9 |
|                     |                     |                     | 89,9 |
|                     |                     |                     | 97,4 |
|                     |                     |                     | 97,3 |
|                     |                     |                     | 86   |
|                     |                     |                     | 88,2 |
|                     |                     |                     | 77,8 |
|                     |                     |                     | 70,1 |
|                     |                     |                     | 96   |
|                     |                     |                     | 100  |
|                     |                     |                     | 95,3 |
| ENSBTAP00000038069  | ENSBTAG00000003819  | ENSBTAT000000038254 | 97,2 |
|                     |                     |                     |      |
|                     |                     |                     | 95,7 |
| ENSBTAP00000038339  | ENSBTAG000000020758 | ENSBTAT000000038526 | 99   |
|                     |                     |                     | 84,2 |
|                     |                     |                     | 98,8 |
|                     |                     |                     | 89,5 |
| ENSBTAP00000042949  | ENSBTAG000000014409 | ENSBTAT000000045570 | 98,2 |
| ENSBTAP00000040258  | ENSBTAG00000000785  | ENSBTAT000000042622 | 99,6 |
|                     |                     |                     | 91,7 |
|                     |                     |                     | 95,1 |
|                     |                     |                     | 98,8 |
|                     |                     |                     | 98,9 |
|                     |                     |                     | 97,7 |
|                     |                     |                     | 98,4 |
|                     |                     |                     | 85,9 |
|                     |                     |                     | 97,5 |
|                     |                     |                     | 94   |
|                     |                     |                     | 98,9 |
|                     |                     |                     | 81,1 |
| ENSBTAP000000012303 | ENSBTAG000000009346 | ENSBTAT000000012303 | 100  |
| ENSBTAP000000019230 | ENSBTAG000000014463 | ENSBTAT000000019230 | 99,6 |
|                     |                     |                     | 99,2 |
|                     |                     |                     | 98,1 |
|                     |                     |                     | 96,3 |
|                     |                     |                     | 99,6 |
|                     |                     |                     | 87,2 |
|                     |                     |                     | 92,1 |
| ENSBTAP00000000463  | ENSBTAG000000000357 | ENSBTAT000000000463 | 94,5 |
| ENSBTAP000000012605 | ENSBTAG000000009578 | ENSBTAT000000012605 | 99,3 |
| ENSBTAP000000026780 | ENSBTAG000000020102 | ENSBTAT000000026780 | 96,9 |
|                     |                     |                     | 100  |
| ENSBTAP000000016792 | ENSBTAG000000012647 | ENSBTAT000000016792 | 98,1 |
|                     |                     |                     | 99,2 |
|                     |                     |                     | 96,9 |
|                     |                     |                     | 94,9 |
|                     |                     |                     | 95,5 |
|                     |                     |                     | 98,9 |
|                     |                     |                     | 100  |

|                    |                    |                    |      |
|--------------------|--------------------|--------------------|------|
|                    |                    |                    | 99,2 |
|                    |                    |                    | 98,1 |
|                    |                    |                    | 99,6 |
|                    |                    |                    | 100  |
|                    |                    |                    | 97,4 |
|                    |                    |                    | 100  |
| ENSBTAP00000013549 | ENSBTAG00000010254 | ENSBTAT00000013549 | 99,6 |
| ENSBTAP00000015051 | ENSBTAG00000011322 | ENSBTAT00000015051 | 97,6 |
|                    |                    |                    | 99,2 |
|                    |                    |                    | 99,6 |
| ENSBTAP00000042917 | ENSBTAG00000010639 | ENSBTAT00000045536 | 94,8 |
|                    |                    |                    | 98,1 |
| ENSBTAP00000019139 | ENSBTAG00000014393 | ENSBTAT00000019139 | 99,6 |
|                    |                    |                    | 99,2 |
|                    |                    |                    | 100  |
|                    |                    |                    | 99,2 |
|                    |                    |                    | 97,2 |
|                    |                    |                    | 98,4 |
|                    |                    |                    | 96,9 |
|                    |                    |                    | 98,5 |
|                    |                    |                    | 95,2 |
|                    |                    |                    | 97,4 |
|                    |                    |                    | 99,6 |
| ENSBTAP00000046377 | ENSBTAG00000035028 | ENSBTAT00000049489 | 100  |
|                    |                    |                    | 97,2 |
|                    |                    |                    | 99,6 |
|                    |                    |                    | 99,2 |
|                    |                    |                    | 99,2 |
|                    |                    |                    | 100  |
|                    |                    |                    | 97   |
|                    |                    |                    | 99,2 |
|                    |                    |                    | 100  |
|                    |                    |                    | 93,3 |
|                    |                    |                    | 98,9 |
|                    |                    |                    | 100  |
|                    |                    |                    | 98,4 |
|                    |                    |                    | 91,8 |
|                    |                    |                    | 99,2 |
|                    |                    |                    | 100  |
| ENSBTAP00000040257 | ENSBTAG00000030201 | ENSBTAT00000042621 | 98,5 |
|                    |                    |                    | 90,1 |
| ENSBTAP00000018713 | ENSBTAG00000014064 | ENSBTAT00000018713 | 98,5 |
|                    |                    |                    | 97,8 |
| ENSBTAP00000020866 | ENSBTAG00000015713 | ENSBTAT00000020866 | 94,7 |
|                    |                    |                    | 98,1 |
|                    |                    |                    | 97,4 |
|                    |                    |                    | 99,2 |
| ENSBTAP00000021631 | ENSBTAG00000016260 | ENSBTAT00000021631 | 96,3 |
|                    |                    |                    | 96,6 |
| ENSBTAP00000013808 | ENSBTAG00000010460 | ENSBTAT00000013808 | 97,2 |

|                    |                    |                    |      |
|--------------------|--------------------|--------------------|------|
|                    |                    |                    | 98,1 |
|                    |                    |                    | 98,8 |
|                    |                    |                    | 98,8 |
|                    |                    |                    | 94,6 |
| ENSBTAP00000013805 | ENSBTAG00000010457 | ENSBTAT00000013805 | 93,1 |
|                    |                    |                    | 92,2 |
|                    |                    |                    | 95,7 |
|                    |                    |                    | 100  |
| ENSBTAP00000013238 |                    |                    | 99,6 |
| ENSBTAP00000025471 | ENSBTAG00000019134 | ENSBTAT00000025471 | 98,8 |
|                    |                    |                    | 99,3 |
|                    |                    |                    | 95,7 |
|                    |                    |                    | 98,1 |
|                    |                    |                    | 89,7 |
|                    |                    |                    |      |
| ENSBTAP00000014411 | ENSBTAG00000010855 | ENSBTAT00000014411 | 100  |
| ENSBTAP00000013449 | ENSBTAG00000015670 | ENSBTAT00000013449 | 100  |
|                    |                    |                    | 99,6 |
|                    |                    |                    | 92,3 |
|                    |                    |                    | 97,6 |
|                    |                    |                    | 97,3 |
|                    |                    |                    | 93,3 |
| ENSBTAP00000018603 |                    |                    |      |
|                    |                    |                    | 98,4 |
|                    |                    |                    | 99,3 |
|                    |                    |                    | 99,3 |
|                    |                    |                    | 98,6 |
|                    |                    |                    | 98,6 |
|                    |                    |                    | 98,9 |
|                    |                    |                    | 98,9 |
|                    |                    |                    | 95,6 |
|                    |                    |                    | 98,2 |
|                    |                    |                    | 97,8 |
|                    |                    |                    | 94   |
|                    |                    |                    | 85,7 |
|                    |                    |                    | 93,4 |
|                    |                    |                    | 94,6 |
| ENSBTAP00000012838 | ENSBTAG00000009736 | ENSBTAT00000012838 | 98,8 |
|                    |                    |                    | 97,7 |
|                    |                    |                    | 91,7 |
|                    |                    |                    | 95   |
|                    |                    |                    | 96,4 |
|                    |                    |                    | 97,3 |
|                    |                    |                    | 99,1 |
|                    |                    |                    | 99,4 |
|                    |                    |                    | 98,6 |
| ENSBTAP00000026519 | ENSBTAG00000019907 | ENSBTAT00000026519 | 94,4 |
|                    |                    |                    | 99,3 |
|                    |                    |                    | 94,5 |
|                    |                    |                    | 99,3 |



|                    |                    |                    |      |
|--------------------|--------------------|--------------------|------|
| ENSBTAP00000012197 | ENSBTAG00000009258 | ENSBTAT00000012197 |      |
|                    |                    |                    | 94,4 |
|                    |                    |                    | 85   |
|                    |                    |                    | 92,4 |
|                    |                    |                    | 96,1 |
|                    |                    |                    | 99,6 |
|                    |                    |                    | 96,8 |
|                    |                    |                    | 97,2 |
|                    |                    |                    | 99,6 |
| ENSBTAP00000022534 | ENSBTAG00000016943 | ENSBTAT00000022534 | 99,2 |
|                    |                    |                    | 84,1 |
|                    |                    |                    | 100  |
|                    |                    |                    | 98   |
|                    |                    |                    | 96,4 |
| ENSBTAP00000022347 | ENSBTAG00000016799 | ENSBTAT00000022347 | 94   |
|                    |                    |                    | 99,2 |
|                    |                    |                    | 96,8 |
|                    |                    |                    | 96,8 |
|                    |                    |                    | 89,3 |
|                    |                    |                    | 99,3 |
|                    |                    |                    | 100  |
|                    |                    |                    | 79,4 |
|                    |                    |                    | 98,9 |
|                    |                    |                    | 100  |
| ENSBTAP00000015530 | ENSBTAG00000010408 | ENSBTAT00000015530 | 100  |
|                    |                    |                    | 95,7 |
|                    |                    |                    | 92,3 |
|                    |                    |                    | 96   |
|                    |                    |                    | 87,4 |
|                    |                    |                    | 82,8 |
|                    |                    |                    | 89,2 |
|                    |                    |                    | 94,1 |
|                    |                    |                    | 99,2 |
|                    |                    |                    | 95,9 |
|                    |                    |                    | 96,5 |
|                    |                    |                    | 85,4 |
| ENSBTAP00000030935 | ENSBTAG00000003325 | ENSBTAT00000030970 | 95,1 |
|                    |                    |                    | 98   |
|                    |                    |                    | 97,7 |
| ENSBTAP00000010292 | ENSBTAG00000007825 | ENSBTAT00000010292 | 99,2 |
| ENSBTAP00000004466 | ENSBTAG00000030977 | ENSBTAT00000004466 | 99,6 |
|                    |                    |                    | 98,8 |
|                    |                    |                    | 98,5 |
|                    |                    |                    | 99,2 |
|                    |                    |                    | 96,4 |
|                    |                    |                    | 100  |
|                    |                    |                    | 100  |
|                    |                    |                    | 99,2 |
|                    |                    |                    | 100  |
|                    |                    |                    | 97,7 |

|                    |                    |                    |      |
|--------------------|--------------------|--------------------|------|
|                    |                    |                    | 99,6 |
|                    |                    |                    | 99,6 |
|                    |                    |                    | 96,2 |
|                    |                    |                    | 77,3 |
| ENSBTAP00000009766 | ENSBTAG00000007428 | ENSBTAT00000009766 | 94,8 |
|                    |                    |                    | 71,9 |
| ENSBTAP00000012302 | ENSBTAG00000009343 | ENSBTAT00000012302 | 75,3 |
|                    |                    |                    | 98,3 |
|                    |                    |                    | 100  |
|                    |                    |                    | 100  |
| ENSBTAP00000022500 | ENSBTAG00000016915 | ENSBTAT00000022500 | 99,3 |
|                    |                    |                    | 99,3 |
|                    |                    |                    | 99,7 |
| ENSBTAP00000025356 | ENSBTAG00000019049 | ENSBTAT00000025356 | 99,7 |
|                    |                    |                    | 100  |
|                    |                    |                    | 99   |
|                    |                    |                    | 99,7 |
| ENSBTAP00000024657 |                    |                    | 89,7 |
| ENSBTAP00000031759 | ENSBTAG00000012016 | ENSBTAT00000031813 | 97   |
|                    |                    |                    | 99,2 |
|                    |                    |                    | 71,5 |
|                    |                    |                    |      |

| <b>% identity in Protein</b> | <b>Comments</b>    |
|------------------------------|--------------------|
| 96,3                         |                    |
| 98,1                         |                    |
| 100                          |                    |
| 80,1                         |                    |
| 84,5                         | Insertion in human |
| 97                           | Insertion in human |
| 90,3                         | Deletion in human  |
| 93,9                         |                    |
| 97,8                         |                    |
| 97,2                         |                    |
| 98                           |                    |
| 95,3                         |                    |
| 75,6                         |                    |
| 97,1                         |                    |
| 87,4                         | Insertion/Deletion |
| 85,4                         |                    |
| 83                           |                    |
| 94,6                         |                    |
| 85,9                         | Insertion in human |
| 87,8                         | Deletion in human  |
| 73,6                         |                    |
| 83,8                         |                    |
|                              |                    |
| 94,9                         |                    |
| 70,5                         | Insertion in human |
| 99,4                         |                    |
| 99,1                         |                    |
| 99,4                         |                    |
| 98,9                         |                    |
| 85,6                         | Insertion in human |
| 92,3                         |                    |
| 99,1                         |                    |
| 93,1                         |                    |
| 97,8                         |                    |
| 98,4                         |                    |
| 98                           |                    |
| 87,7                         |                    |
| 99,2                         |                    |
| 98                           |                    |
| 95,9                         |                    |
| 88,5                         | Insertion in human |
| 97,2                         |                    |
| 95,4                         |                    |
| 97                           |                    |
| 89,1                         |                    |
| 90,9                         |                    |
| 95,7                         |                    |
| 99,4                         |                    |
| 93,4                         |                    |

|      |                    |
|------|--------------------|
| 96,7 |                    |
| 99,9 |                    |
| 98,9 |                    |
| 96,1 |                    |
| 88,5 | Insertion in human |
| 72,9 | Insertion in human |
| 81,9 | Insertion in human |
| 96,8 |                    |
| 95,9 |                    |
| 98   |                    |
| 91,8 |                    |
| 84,1 |                    |
| 89,5 | Deletion in human  |
| 94,9 |                    |
| 95,1 |                    |
| 87,3 |                    |
| 87   |                    |
| 87,6 |                    |
| 83,8 |                    |
| 78,4 |                    |
| 96   |                    |
| 83,8 | Deletion in human  |
| 91,2 |                    |
| 73,8 | Insertion in human |
| 57,5 | Insertion/Deletion |
| 74,4 | Deletion in human  |
| 89,1 | Insertion in human |
| 97,4 |                    |
| 93,5 |                    |
| 96,4 | Deletion in human  |
| 79,2 | Insertion in human |
| 90,7 | Insertion in human |
| 79,2 | Insertion in human |
| 95,9 |                    |
| 96,4 |                    |
| 94,7 |                    |
| 97,4 |                    |
| 96,4 |                    |
| 90,8 | Insertion in human |
| 89,8 |                    |
| 93,4 |                    |
| 77,8 |                    |
| 99,5 |                    |
| 98,7 |                    |
| 97,8 |                    |
| 88,4 |                    |
| 87,1 |                    |
| 95,8 |                    |
| 97,1 | Deletion in human  |
| 47,7 | Insertion/Deletion |

|      |                    |
|------|--------------------|
| 95,5 | Insertion in human |
| 49,3 | Insertion/Deletion |
| 95,7 |                    |
| 91   |                    |
| 85,3 | Insertion/Deletion |
| 91,4 |                    |
| 99,6 |                    |
| 98,9 |                    |
| 99,4 |                    |
| 95,6 | Insertion in human |
| 81,4 | Insertion in human |
| 96,5 | Deletion in human  |
| 97,6 |                    |
| 99,1 | Deletion in human  |
| 90,4 | Deletion in human  |
| 95,8 |                    |
| 85,7 | Insertion in human |
| 84,6 | Deletion in human  |
| 95,5 |                    |
| 97,6 |                    |
| 86,6 | Deletion in human  |
| 98   | Insertion in human |
|      |                    |
| 89,4 |                    |
| 93,8 |                    |
| 93,7 |                    |
| 80   | Insertion/Deletion |
| 64   | Deletion in human  |
| 87,9 |                    |
| 89,6 | Insertion in human |
| 84,5 | Insertion in human |
| 90   | Insertion in human |
| 96,1 |                    |
| 75   |                    |
| 93,3 |                    |
| 97,5 | Deletion in human  |
| 94,8 |                    |
| 93,2 | Deletion in human  |
| 94,9 |                    |
| 89,4 |                    |
| 93   |                    |
| 89,4 |                    |
| 95,6 | Insertion/Deletion |
| 76,5 | Deletion in human  |
| 92,8 |                    |
| 95,9 |                    |
| 96,6 |                    |
| 91,2 |                    |
| 95,1 | Deletion in human  |
| 66,5 | Insertion in human |

|      |                    |
|------|--------------------|
| 80,9 |                    |
| 80,6 | Deletion in human  |
| 74,4 | Insertion in human |
|      |                    |
| 94,3 |                    |
| 96,3 |                    |
| 98,7 |                    |
| 84,1 |                    |
| 94,8 |                    |
| 93,5 | Insertion in human |
| 94,5 |                    |
| 97,6 |                    |
| 97,9 |                    |
| 86   | Insertion in human |
| 96,8 |                    |
| 99,1 |                    |
| 81,3 |                    |
| 66,9 | Insertion in human |
| 91,7 |                    |
| 97,1 | Deletion in human  |
| 80,2 | Insertion in human |
| 98,2 |                    |
| 84,1 |                    |
| 90,8 |                    |
| 95,9 |                    |
| 85,3 | Deletion in human  |
|      |                    |
| 99,7 |                    |
|      |                    |
| 97,6 |                    |
| 98,7 | Deletion in human  |
| 96   | Deletion in human  |
| 95,7 |                    |
| 98,4 |                    |
| 88,6 |                    |
| 91,2 |                    |
| 90,9 |                    |
| 73,7 |                    |
| 72,8 | Insertion in human |
| 98,7 |                    |
| 98,7 |                    |
| 88,5 |                    |
| 93,1 |                    |
| 97   |                    |
| 97,5 |                    |
| 99,7 |                    |
| 96,8 |                    |
| 98   |                    |
| 93,3 |                    |
| 98,4 |                    |

|      |                    |
|------|--------------------|
| 96,1 |                    |
| 93,8 |                    |
| 93,6 | Insertion in human |
| 98   |                    |
| 98,5 |                    |
| 86,3 | Insertion in human |
| 98,2 |                    |
| 90,4 |                    |
| 92,5 |                    |
| 89,7 | Insertion in human |
| 76,8 | Deletion in human  |
| 86,3 | Deletion in human  |
| 93,1 | Insertion in human |
| 84,7 | Insertion in human |
| 93,2 |                    |
| 98,6 |                    |
| 98,2 |                    |
| 90,9 | Insertion in human |
| 98,4 | Deletion in human  |
| 98,7 |                    |
| 98,2 |                    |
| 92,5 |                    |
| 80,5 | Insertion in human |
| 98   |                    |
| 96,7 |                    |
| 94,5 |                    |
| 76,2 | Deletion in human  |
| 96,9 |                    |
| 92,9 |                    |
| 95,6 | Deletion in human  |
| 93,1 | Insertion in human |
| 99,7 |                    |
| 97,6 |                    |
| 96,1 | Insertion in human |
| 88,4 | Insertion in human |
| 67,4 | Insertion in human |
| 99,2 | Deletion in human  |
| 99,5 |                    |
| 99,2 | Insertion/Deletion |
| 100  |                    |
| 100  |                    |
| 90,3 | Insertion in human |
| 94,8 |                    |
| 92,9 |                    |
| 91,5 |                    |
| 87   |                    |
| 79,8 |                    |
| 89,9 | Deletion in human  |
| 95,6 |                    |
| 96,5 |                    |

|      |                    |
|------|--------------------|
| 88,9 |                    |
| 93   |                    |
| 80,6 |                    |
|      |                    |
| 78,6 |                    |
| 88,8 |                    |
| 88,2 |                    |
| 91,1 | Insertion in human |
| 90,2 | Insertion in human |
| 89,1 |                    |
| 99,7 |                    |
| 99,1 |                    |
| 70,9 | Insertion in human |
| 96,5 | Insertion in human |
| 93,3 |                    |
| 88   |                    |
| 97,1 |                    |
| 93,3 |                    |
| 85,4 |                    |
| 68,6 | Insertion in human |
| 94,4 | Insertion/Deletion |
| 81,6 | Insertion/Deletion |
| 78,6 | Insertion in human |
| 91,8 |                    |
| 89,9 | Insertion in human |
| 90,2 |                    |
| 80,1 | Insertion in human |
| 92,8 |                    |
| 84,4 | Insertion in human |
| 76,6 | Insertion in human |
| 90,4 | Insertion in human |
| 95,9 |                    |
| 98   |                    |
| 93,2 |                    |
| 96,1 |                    |
| 89,5 | Insertion in human |
| 77,7 |                    |
| 82,5 | Insertion in human |
| 85,4 |                    |
| 78,5 | Deletion in human  |
| 90,4 | Insertion in human |
| 97,3 | Insertion in human |
| 99,4 | Deletion in human  |
| 56,2 | Insertion/Deletion |
| 72,4 | Deletion in human  |
| 99,4 |                    |
| 91,3 | Insertion in human |
| 99,5 |                    |
| 69,6 |                    |
| 54,5 | Deletion in human  |



|      |                    |
|------|--------------------|
| 76,4 |                    |
| 82,5 |                    |
| 95,1 |                    |
| 93,8 |                    |
| 89,4 |                    |
| 89,3 |                    |
| 80,4 |                    |
| 61,6 | Insertion in human |
| 94,9 |                    |
| 98,1 |                    |
| 92,1 |                    |
| 82,4 | Insertion in human |
|      |                    |
| 91,5 |                    |
| 96,1 | Insertion in human |
| 70,6 | Insertion/Deletion |
| 94,6 |                    |
| 94,9 | Deletion in human  |
| 94,7 | Insertion in human |
| 96,8 | Deletion in human  |
| 88,9 |                    |
| 85,5 |                    |
| 88,2 |                    |
| 89,6 |                    |
| 86,8 |                    |
| 97   |                    |
| 83,2 | Deletion in human  |
| 96,6 |                    |
| 87,5 | Insertion/Deletion |
| 91,9 |                    |
| 73   |                    |
| 81   |                    |
| 77,5 |                    |
| 92,3 |                    |
| 87   |                    |
| 92,6 |                    |
| 98,3 |                    |
| 86,6 | Deletion in human  |
| 89,6 |                    |
| 85,3 |                    |
| 93,3 |                    |
| 95,6 |                    |
| 96,9 |                    |
| 91,5 | Insertion in human |
| 95   | Insertion in human |
| 87,4 |                    |
| 83,1 |                    |
| 79,6 | Deletion in human  |
| 97,2 |                    |
| 95,6 | Insertion in human |

|      |                    |
|------|--------------------|
| 94,4 |                    |
| 89,7 |                    |
| 97,4 |                    |
| 97,4 |                    |
| 89,8 |                    |
| 98,6 |                    |
| 93,2 | Deletion in human  |
| 85,4 |                    |
| 97,1 |                    |
| 98,8 | Deletion in human  |
| 85   |                    |
| 95,7 | Insertion in human |
| 98,7 |                    |
| 97,3 | Insertion in human |
| 99,6 |                    |
| 93,8 |                    |
| 94   |                    |
| 93,4 |                    |
| 89,9 |                    |
| 90,1 | Insertion/Deletion |
| 94,9 |                    |
| 93,5 |                    |
| 99,7 |                    |
| 99,2 |                    |
| 97,6 |                    |
| 94,7 |                    |
| 98,6 |                    |
| 93,2 |                    |
| 100  |                    |
| 97   |                    |
| 96,3 |                    |
| 95,9 | Deletion in human  |
| 89,3 | Insertion/Deletion |
| 98,5 |                    |
| 99,2 | Deletion in human  |
| 95,9 |                    |
| 87,4 |                    |
| 88,2 | Deletion in human  |
| 96   |                    |
| 94,1 | Deletion in human  |
| 82,7 |                    |
| 88,9 | Insertion/Deletion |
| 81,2 | Deletion in human  |
| 81,3 |                    |
| 91,7 | Deletion in human  |
| 94,1 | Deletion in human  |
| 98,7 |                    |
| 93,4 |                    |
| 90,8 | Deletion in human  |
| 97,2 |                    |

|      |                    |
|------|--------------------|
| 87,6 |                    |
| 91,3 | Deletion in human  |
| 93,1 |                    |
| 96,8 | Insertion in human |
| 84   | Insertion/Deletion |
| 91,3 |                    |
| 92,9 |                    |
| 97,3 |                    |
| 97,9 |                    |
| 97,7 |                    |
| 98   | Deletion in human  |
| 98,2 |                    |
| 97,3 | Deletion in human  |
| 96,5 |                    |
|      |                    |
| 98,4 | Insertion in human |
| 98   |                    |
| 93,7 | Deletion in human  |
| 91,7 | Insertion in human |
| 95,3 | Deletion in human  |
| 95,5 |                    |
| 94,8 |                    |
|      |                    |
| 92,5 |                    |
| 98,5 |                    |
| 93,9 |                    |
| 93,1 |                    |
| 92,4 |                    |
| 97,7 | Insertion in human |
| 83,1 | Insertion in human |
| 92,9 |                    |
| 96   |                    |
| 94,8 |                    |
| 87,9 |                    |
| 81,6 |                    |
| 74,4 |                    |
| 73,8 |                    |
| 88   | Insertion in human |
| 89,5 |                    |
| 80,1 |                    |
| 94   |                    |
| 90,7 |                    |
| 83,1 |                    |
| 87,2 |                    |
| 94,1 |                    |
| 90,7 |                    |
| 87,2 |                    |
| 97,9 |                    |
| 93,5 |                    |
| 97,2 | Insertion in human |

|      |                    |
|------|--------------------|
|      |                    |
| 86,6 | Insertion in human |
| 81,2 |                    |
| 90   |                    |
| 87   | Deletion in human  |
| 99,6 |                    |
| 90,9 |                    |
| 96,3 |                    |
| 96,9 |                    |
| 97   | Deletion in human  |
| 76,9 |                    |
| 96,9 |                    |
| 88,4 | Insertion in human |
| 93,4 |                    |
| 89,1 | Insertion in human |
| 98,6 |                    |
| 95,5 |                    |
| 86,7 |                    |
| 89   |                    |
| 92,8 |                    |
| 94,9 |                    |
| 75,6 |                    |
| 92,7 |                    |
| 94,2 |                    |
| 97,5 |                    |
| 83,7 | Deletion in human  |
| 87,6 | Deletion in human  |
| 91,1 |                    |
| 80,4 |                    |
| 77,6 |                    |
| 80,7 |                    |
| 89,2 |                    |
| 97,5 |                    |
| 92,2 |                    |
| 94,3 |                    |
| 78,1 | Insertion/Deletion |
| 86,1 |                    |
| 86,3 | Insertion/Deletion |
| 96,5 |                    |
| 92,6 | Deletion in human  |
| 93,8 |                    |
| 94,8 | Insertion in human |
| 79   | Insertion in human |
| 92,6 |                    |
| 80,2 | Deletion in human  |
| 92,5 |                    |
| 94,7 | Insertion in human |
| 96,5 |                    |
| 97,8 | Insertion/Deletion |
| 89,3 | Insertion in human |

|      |                    |
|------|--------------------|
| 83,5 | Insertion in human |
| 94,8 | Deletion in human  |
| 89,9 |                    |
| 74,4 |                    |
| 86,7 |                    |
| 61,7 | Insertion/Deletion |
| 66,1 | Insertion in human |
| 90,5 |                    |
| 99,2 |                    |
| 94,3 |                    |
| 93,5 |                    |
| 97,9 |                    |
| 98,6 |                    |
| 96,4 | Insertion in human |
| 98,6 |                    |
| 97,9 |                    |
| 96,5 | Insertion in human |
| 80,7 |                    |
| 91,5 |                    |
| 99,3 |                    |
| 63,6 |                    |
|      |                    |
